# Supplementary material for: Identification of the biological function of miR-9 in spinal cord ischemia-reperfusion injury in rats
Source: PeerJ. 2021 May 13;9:e11440. doi: 10.7717/peerj.11440 (PMC8126262; doi:10.7717/peerj.11440)
Supplement: Supplemental Information 6 [file peerj-09-11440-s006.xls]

## Sheet: up regulated DEGs in GSE138966
id	foldChange	log2FoldChange	pval	up_down	gene
NM_001003705.2	Inf	Inf	0.0108702	Up	Slc38a7
NM_001003958.1	Inf	Inf	0.00297898	Up	Dnmt3a
NM_001006961.1	Inf	Inf	1.78e-09	Up	Osm
NM_001007013.1	Inf	Inf	0.0010119	Up	Gphb5
NM_001011909.1	Inf	Inf	4.75e-05	Up	Gpatch2
NM_001011957.1	Inf	Inf	0.0473685	Up	Ell3
NM_001012049.1	Inf	Inf	4.29e-13	Up	Mfap3l
NM_001012155.1	Inf	Inf	1.85e-05	Up	Tm9sf1
NM_001013894.1	Inf	Inf	0.0244735	Up	Lilrb4
NM_001014184.1	Inf	Inf	0.00190885	Up	Lpin3
NM_001024354.1	584.76	Inf	0.000432266	Up	Lrrc14
NM_001025680.1	237.522	Inf	0.0204224	Up	Gpr4
NM_001033913.1	152.776	Inf	0.010243	Up	Gimap5
NM_001037357.2	112.586	Inf	1.07e-09	Up	Lilrb3l
NM_001047901.1	90.2992	Inf	0.016417	Up	Ankle2
NM_001100123.1	75.3455	Inf	2.58e-06	Up	Lilrc2
NM_001105973.1	55.9594	Inf	0.000284909	Up	Slamf8
NM_001106054.1	52.6988	Inf	0.0423752	Up	Klhl1
NM_001106496.1	46.9903	Inf	0.0126097	Up	Emc7
NM_001106515.1	46.9585	Inf	0.0021214	Up	Fermt1
NM_001106872.1	42.4289	Inf	0.0238387	Up	Ccr1l1
NM_001106885.1	41.6862	Inf	0.0166761	Up	Trem1
NM_001107592.1	32.9832	Inf	5.99e-14	Up	Loxl4
NM_001107680.1	32.5677	Inf	0.0400872	Up	Mlf1
NM_001107972.1	30.2139	Inf	0.000415856	Up	Hivep3
NM_001107994.2	29.9405	Inf	0.0482073	Up	Spsb1
NM_001108108.1	29.2867	Inf	0.0212196	Up	Ano6
NM_001108303.2	27.8233	Inf	0.00423807	Up	Sdk2
NM_001108757.1	25.4441	Inf	1.94e-06	Up	Pate4
NM_001108966.1	24.2734	Inf	0.00979927	Up	Rab22a
NM_001109880.1	22.2047	Inf	0.00243693	Up	Add2
NM_001169142.1	17.7192	Inf	0.000288218	Up	Nlrp12
NM_001270809.1	15.9967	Inf	3.23e-06	Up	Sphk1
NM_001271240.1	15.613	Inf	0.000202291	Up	Traf1
NM_012525.1	14.7998	Inf	0.021843	Up	Cgm4
NM_012737.1	13.8365	Inf	6.4e-06	Up	Apoa4
NM_012831.1	13.6888	Inf	1.9e-14	Up	Cebpg
NM_012854.2	13.4478	Inf	0.0178476	Up	Il10
NM_013123.3	12.8465	Inf	0.0343138	Up	Il1r1
NM_017128.2	12.1995	Inf	0.0326155	Up	Inhba
NM_017160.1	12.1246	Inf	0.0475315	Up	Rps6
NM_019139.1	11.6112	Inf	4.14e-05	Up	Gdnf
NM_019144.2	11.5815	Inf	0.0299377	Up	Acp5
NM_021689.1	10.7918	Inf	6.74e-17	Up	Ereg
NM_022196.2	10.5007	Inf	2.85e-12	Up	Lif
NM_022276.1	10.3646	Inf	0.00870102	Up	Gcnt1
NM_023021.2	10.0846	Inf	0.000756854	Up	Kcnn4
NM_030834.1	9.77711	Inf	4.51e-05	Up	Slc16a3
NM_031515.3	9.41199	Inf	0.00871903	Up	Kras
NM_031633.3	9.31554	Inf	0.0360173	Up	Foxm1
NM_031634.1	9.31348	Inf	0.0157785	Up	Mefv
NM_031659.1	9.26417	Inf	1.68e-16	Up	Tgm1
NM_053348.2	8.99736	Inf	0.0166313	Up	Fetub
NM_053449.1	8.89073	Inf	5.3e-05	Up	Hdac4
NM_053763.1	8.5475	Inf	0.0186884	Up	Cyp27b1
NM_053852.1	8.43932	Inf	0.0491463	Up	Csf2
NM_057151.1	8.2818	Inf	0.00753687	Up	Ccl17
NM_130753.1	8.179	Inf	0.00758555	Up	Fgf19
NM_130754.1	8.176	Inf	0.0114121	Up	Fgf23
NM_133514.1	8.06412	Inf	3.95e-05	Up	Mmp10
NM_138852.1	7.90636	Inf	0.0110648	Up	Prok2
NM_138879.1	7.85005	Inf	0.00186471	Up	Sele
NM_139038.1	7.77447	Inf	1.31e-05	Up	Rin1
NM_173097.1	7.5229	Inf	0.0299061	Up	Reg3g
NM_181380.2	7.37812	Inf	0.0166599	Up	Rtn4rl2
XM_002727841.4	6.93969	Inf	3.27e-06	Up	Cd300ld
XM_003749231.4	6.81918	Inf	0.00337015	Up	LOC100909879
XM_003750994.4	6.61552	Inf	2.4e-06	Up	LOC103689934
XM_006228020.3	6.47524	Inf	0.000341309	Up	Oscar
XM_006228063.3	6.46272	Inf	2.73e-08	Up	Lilrb3a
XM_006228069.3	6.44969	Inf	0.00246047	Up	Lilrb3b
XM_006228205.3	6.41843	Inf	0.027501	Up	Zfp28
XM_006228447.3	6.37509	Inf	0.0101188	Up	Zfp428
XM_006228822.3	6.3391	Inf	0.000552265	Up	Ffar2
XM_006229237.2	6.28225	Inf	0.000811638	Up	Csrp3
XM_006232179.3	5.69396	Inf	0.000156415	Up	Mtfr1
XM_006232533.3	5.63797	Inf	0.000289523	Up	Fga
XM_006232580.3	5.62515	Inf	1.98e-06	Up	Tpm3
XM_006233006.3	5.5595	Inf	0.0168781	Up	Zfp697
XM_006233636.3	5.48711	Inf	0.029602	Up	Il1rn
XM_006233789.1	5.44538	Inf	0.00131071	Up	Gfi1b
XM_006234273.3	5.37647	Inf	0.0174552	Up	Tank
XM_006234773.3	5.27725	Inf	0.0133646	Up	Rpap1
XM_006236842.3	5.02243	Inf	0.00446334	Up	Anxa4
XM_006238749.3	4.8221	Inf	0.0133934	Up	Mpl
XM_006239376.1	4.71926	Inf	8.99e-05	Up	Nppb
XM_006241072.3	4.53595	Inf	0.00232102	Up	Brd4
XM_006242432.3	4.43712	Inf	0.00083973	Up	Nfe2
XM_006243229.3	4.35975	Inf	0.0202557	Up	Map2k5
XM_006243766.3	4.31949	Inf	0.043548	Up	Atrip
XM_006244155.3	4.28097	Inf	0.0394596	Up	Xirp1
XM_006244562.3	4.25042	Inf	0.00135366	Up	Slc29a1
XM_006244761.3	4.22811	Inf	0.00445466	Up	Zap70
XM_006245362.3	4.16077	Inf	0.00745162	Up	Neu2
XM_006245458.3	4.12982	Inf	0.000220437	Up	Lrrfip1
XM_006245490.2	4.12461	Inf	0.00510699	Up	Csprs
XM_006245539.3	4.12268	Inf	0.00169928	Up	Gpr35
XM_006245667.3	4.12062	Inf	0.00197196	Up	Myl12a
XM_006247614.3	3.95457	Inf	0.0450038	Up	Slc16a6
XM_006247881.3	3.93519	Inf	0.000155582	Up	Sectm1b
XM_006250090.3	3.76601	Inf	2.52e-06	Up	RGD1304622
XM_006250235.1	3.7541	Inf	3.03e-07	Up	Fcgr2b
XM_006250784.3	3.67666	Inf	0.00431443	Up	Rufy3
XM_006252012.1	3.56415	Inf	0.00884316	Up	Ltb4r
XM_006253602.3	3.4507	Inf	0.00166213	Up	Hk3
XM_006254214.3	3.41193	Inf	0.00172088	Up	Sfmbt2
XM_006254757.3	3.38594	Inf	0.032544	Up	LOC102555392
XM_006254769.2	3.38243	Inf	0.00267849	Up	Smim3
XM_008759401.2	3.22909	Inf	0.0396673	Up	Ube3a
XM_008759525.2	3.22694	Inf	0.00555877	Up	Mctp2
XM_008759676.2	3.2176	Inf	0.0477424	Up	Calca
XM_008760536.1	3.16203	Inf	0.00252364	Up	Nhlrc2
XM_008761700.2	3.10514	Inf	0.0201213	Up	Ggta1
XM_008761751.2	3.09983	Inf	0.03934	Up	Fbxw2
XM_008762055.2	3.09319	Inf	0.00729852	Up	Cd44
XM_008762939.2	3.04504	Inf	0.00979798	Up	Hoxa3
XM_008764017.2	3.00326	Inf	0.0370769	Up	Fhl3
XM_008764058.2	3.00309	Inf	2.94e-07	Up	Ybx1
XM_008764644.2	2.96756	Inf	0.00314128	Up	Scin
XM_008764902.2	2.95824	Inf	0.0237906	Up	LOC299277
XM_008765119.2	2.92885	Inf	0.0458014	Up	Mbd3
XM_008765486.2	2.90648	Inf	0.0481376	Up	LOC102551754
XM_008766180.2	2.88413	Inf	0.0100807	Up	Jaml
XM_008766893.1	2.87059	Inf	0.000665171	Up	Tspo2
XM_008768032.2	2.80916	Inf	0.000251239	Up	Slfn13
XM_008768099.2	2.80641	Inf	0.0466263	Up	Myo19
XM_008769490.2	2.75997	Inf	0.00494205	Up	Rab7b
XM_008770049.2	2.73127	Inf	0.012907	Up	Tmprss11b
XM_008770381.2	2.71243	Inf	0.000980675	Up	Cfap99
XM_008770926.2	2.69278	Inf	0.0155291	Up	Naa16
XM_008771064.2	2.68728	Inf	0.0141534	Up	Jak3
XM_008771074.2	2.68623	Inf	0.000415907	Up	Haus8
XM_008772196.2	2.66085	Inf	0.032544	Up	LOC103694226
XM_008772472.1	2.64422	Inf	0.00547202	Up	Ednra
XM_008772516.2	2.636	Inf	0.000941344	Up	Anapc10
XM_008772857.2	2.61183	Inf	0.0278902	Up	Egr2
XM_008772978.2	2.60551	Inf	0.0437402	Up	Pkib
XM_008773086.2	2.59828	Inf	0.034342	Up	Ftsj1
XM_017588676.1	2.58411	Inf	0.0269066	Up	Il16
XM_017588768.1	2.56847	Inf	0.00834078	Up	Ahnak
XM_017588971.1	2.55675	Inf	0.041431	Up	Insc
XM_017589110.1	2.55341	Inf	0.0120881	Up	Fam71e2
XM_017589389.1	2.54156	Inf	0.00947013	Up	Cyp2r1
XM_017589434.1	2.54087	Inf	0.00892922	Up	Lsp1
XM_017589746.1	2.52747	Inf	0.0270268	Up	Tmem86b
XM_017589918.1	2.52181	Inf	0.00490006	Up	RGD1562625
XM_017589925.1	2.52041	Inf	0.00773946	Up	Tarm1
XM_017591056.1	2.46764	Inf	0.0034386	Up	Adam15
XM_017591116.1	2.46649	Inf	4.45e-06	Up	Il31ra
XM_017591341.1	2.46206	Inf	0.00720112	Up	Zgrf1
XM_017591373.1	2.46129	Inf	0.0220898	Up	LOC102546663
XM_017591436.1	2.45885	Inf	0.0237685	Up	Gpr176
XM_017591706.1	2.44668	Inf	0.0147424	Up	Itga4
XM_017592298.1	2.41922	Inf	9.26e-08	Up	LOC102552784
XM_017593045.1	2.38296	Inf	0.0495259	Up	Tead4
XM_017593832.1	2.36044	Inf	0.0436458	Up	Epb41
XM_017594333.1	2.34311	Inf	0.0342025	Up	Pxdn
XM_017595201.1	2.30952	Inf	3.57e-05	Up	LOC108351431
XM_017595249.1	2.30817	Inf	0.00141866	Up	Apol2
XM_017596626.1	2.24413	Inf	0.0114996	Up	Crisp1
XM_017596949.1	2.23214	Inf	0.00215144	Up	Slfn4
XM_017597451.1	2.2187	Inf	0.0341646	Up	Zfp286a
XM_017597798.1	2.21015	Inf	0.00738293	Up	LOC108352181
XM_017597819.1	2.20988	Inf	0.00758811	Up	RGD1565046
XM_017597860.1	2.20839	Inf	4.77e-06	Up	Samsn1
XM_017598121.1	2.19229	Inf	0.0271358	Up	Abi3bp
XM_017598194.1	2.18643	Inf	0.0289256	Up	LOC680329
XM_017598950.1	2.17012	Inf	0.00352552	Up	Sec16b
XM_017598966.1	2.1678	Inf	0.000138464	Up	Il19
XM_017599367.1	2.15241	Inf	0.0458309	Up	Cxcl6
XM_017599607.1	2.14652	Inf	0.0365743	Up	Fam149b1
XM_017599874.1	2.13601	Inf	3.57e-06	Up	LOC102546567
XM_017600214.1	2.12168	Inf	0.0426776	Up	Fam129c
XM_017600472.1	2.11749	Inf	7.66e-05	Up	Npepo
XM_017600660.1	2.10995	Inf	0.0206633	Up	Olah
XM_017600692.1	2.10981	Inf	0.0195609	Up	LOC102556474
XM_017600829.1	2.10742	Inf	0.0126035	Up	Pcdha4
XM_017601016.1	2.09399	Inf	8.52e-06	Up	Synpo
XM_017601134.1	2.08783	Inf	0.00049011	Up	LOC108348812
XM_017601224.1	2.08526	Inf	0.0283517	Up	Elmo3
XM_017601899.1	2.06376	Inf	0.020229	Up	Il2rg
XM_017602443.1	2.04995	Inf	0.000202687	Up	LOC108353314
XM_017602446.1	2.04853	Inf	0.000202687	Up	LOC108353315
NM_017104.2	12.3529	11.936	5.2e-39	Up	Csf3
NM_013037.1	13.0573	11.396	0.00108024	Up	Il1rl1
NM_203493.3	7.08704	10.681	0.0282573	Up	Dmp1
XM_008766983.2	2.86765	10.654	6.52e-06	Up	Il1r2
NM_012589.2	14.4373	10.6419	3.75e-58	Up	Il6
NM_053647.1	8.68396	10.3439	8.6e-39	Up	Cxcl2
XM_006246949.3	3.99771	10.1466	9.86e-07	Up	LOC497963
NM_053822.2	8.46528	9.93923	0.000520228	Up	S100a8
NM_138522.1	7.94434	9.85985	8.34e-20	Up	Cxcl3
NM_053372.1	8.97171	9.61467	6.5e-08	Up	Slpi
NM_207615.2	7.08186	9.59864	9.5e-08	Up	Clcf1
NM_133530.1	8.05762	9.58968	0.0427069	Up	Mmp13
NM_012620.1	14.1898	9.27522	3.06e-15	Up	Serpine1
NM_001105848.2	60.0556	9.1917	2.37e-05	Up	Helz
NM_173141.1	7.44688	9.17862	1.45e-14	Up	Tfpi2
XM_006242055.2	4.46666	9.11226	0.00704278	Up	Pacsin2
XM_006233053.2	5.55502	9.10626	3.6e-06	Up	Ngf
NM_172323.1	7.54011	9.08478	2.44e-09	Up	Has1
XM_006248415.3	3.86989	9.03037	6.49e-09	Up	Stfa2l2
XM_008769495.2	2.75852	8.98006	0.00323248	Up	Serpinb2
NM_012611.3	14.3308	8.9394	7.7e-05	Up	Nos2
NM_030845.1	9.75317	8.92286	2.49e-18	Up	Cxcl1
XM_008763757.2	3.01238	8.7884	0.00534808	Up	Tnc
XM_017595334.1	2.30265	8.68082	2.1e-10	Up	Krt7
NM_001191861.1	16.821	8.64269	0.00300923	Up	Cdk6
NM_001014209.1	Inf	8.63404	0.000524759	Up	Plet1
NM_133385.2	8.08449	8.51921	2.34e-08	Up	Ucn2
XM_006245288.3	4.16543	8.46348	0.00220439	Up	Rufy4
XM_002727718.5	6.9453	8.4132	4.31e-06	Up	Fam83g
NM_001037544.1	111.648	8.33174	0.019286	Up	Slc6a14
NM_031530.1	9.38699	8.32094	1.43e-14	Up	Ccl2
NM_012953.1	13.1975	8.25882	1.03e-17	Up	Fosl1
XM_017592166.1	2.4234	8.24414	3.55e-09	Up	LOC103691841
NM_133519.4	8.06307	8.23258	1e-39	Up	Il11
XM_017596546.1	2.24653	8.20749	3.83e-06	Up	Trem3
NM_017183.1	12.0232	8.20125	6.65e-08	Up	Cxcr2
XM_003750838.4	6.62439	8.12099	0.0473118	Up	Btnl10
NM_134352.1	7.98414	8.08439	1.92e-09	Up	Plaur
NM_001106456.1	47.4365	8.02205	7.29e-08	Up	Mab21l3
NM_001079893.2	77.2351	7.94658	1.66e-06	Up	Dusp14
XM_006250725.3	3.68614	7.94648	2.77e-05	Up	Shroom3
XM_008764273.1	2.98698	7.90955	0.00163746	Up	Fblim1
XM_006246966.3	3.99188	7.90601	4.53e-05	Up	Ccl4
NM_001109536.1	22.6519	7.89549	7.26e-14	Up	Ptx3
XM_006250150.3	3.76601	7.89192	4.74e-05	Up	Selp
NM_001168285.1	17.9903	7.88248	2.01e-11	Up	RGD1559482
NM_053397.1	8.93934	7.80923	7.67e-07	Up	Artn
XM_006246402.3	4.05947	7.69158	1.54e-10	Up	Lypd8
XM_017590294.1	2.49749	7.67619	3.1e-06	Up	Sirpb2
XM_008762469.2	3.06661	7.62776	3.81e-05	Up	Pkig
XM_006229761.3	6.19957	7.62305	0.000896615	Up	Tsku
XM_006251487.2	3.61259	7.61635	3.59e-06	Up	Upp1
XM_006244476.3	4.26346	7.60215	4.49e-06	Up	Mdfi
XM_006256158.3	3.30729	7.58212	6.9e-15	Up	Hmga1
NM_017210.4	11.9393	7.56405	5.11e-09	Up	Dio3
XM_001080739.5	6.94877	7.55069	3.48e-05	Up	Scimp
XM_017602047.1	2.06045	7.54022	0.00040436	Up	Srpx2
NM_001191577.1	17.2776	7.50801	0.014187	Up	Midn
NM_001109531.1	22.6996	7.50163	0.00320637	Up	Mis18bp1
XM_006246376.3	4.06731	7.49882	0.00271339	Up	LOC24906
XM_006254854.3	3.37708	7.4522	0.00263086	Up	Ptpn2
XM_006241132.3	4.53422	7.4079	0.00172936	Up	Pram1
XM_008769773.1	2.74403	7.39203	0.00220358	Up	LOC108348047
NM_017019.1	12.64	7.37959	1.2e-15	Up	Il1a
NM_139341.1	7.72327	7.34262	0.0188962	Up	Slc15a3
NM_053819.1	8.5168	7.32426	9.99e-07	Up	Timp1
XM_008768398.1	2.79847	7.29595	3.63e-15	Up	Socs3
NM_022221.1	10.4678	7.2779	1.53e-10	Up	Mmp8
NM_001024887.1	490.94	7.25528	0.000490835	Up	Sigirr
NM_130425.1	8.20486	7.22645	0.000515657	Up	Runx3
XM_006246277.3	4.08372	7.18426	0.00248127	Up	Rapgef6
XM_017598052.1	2.19714	7.18328	0.000725419	Up	Spidr
NM_001007612.1	Inf	7.05128	1.27e-34	Up	Ccl7
XM_008773690.2	2.58573	7.03455	9.68e-09	Up	LOC102555330
XM_017602444.1	2.04942	7.03455	9.68e-09	Up	LOC103694571
NM_001105822.1	60.2934	7.02894	2.34e-15	Up	Ccl12
XM_008764903.2	2.95237	7.00629	7.76e-13	Up	RGD1565462
XM_006252977.3	3.47142	6.97951	0.00237904	Up	Lrrc25
XM_008769504.2	2.75736	6.95013	0.0387637	Up	LOC100909964
XM_006237954.3	4.93115	6.9387	0.00297185	Up	Mms22l
XM_008768626.2	2.79255	6.91909	0.047931	Up	Cblb
NM_021583.3	10.8516	6.90828	1.12e-07	Up	Ptges
XM_008761639.2	3.10522	6.88884	0.0125016	Up	Med27
NM_201992.1	7.09239	6.8845	6.87e-06	Up	Fcar
XM_006237990.3	4.91835	6.88365	0.0026458	Up	Rngtt
NM_012582.2	14.456	6.8772	0.00012762	Up	Hp
NM_031512.2	9.46632	6.83462	4.68e-10	Up	Il1b
XM_017589488.1	2.53996	6.82642	0.000152729	Up	Mical2
NM_013033.2	13.0588	6.81699	0.0497186	Up	Slc5a1
XM_006239579.3	4.68222	6.81488	0.00097684	Up	RGD1311517
XM_017593288.1	2.3776	6.80294	0.000253929	Up	Csf3r
XM_017600778.1	2.10772	6.80282	0.00331687	Up	LOC108348486
XM_006230501.3	6.0168	6.7983	2.55e-05	Up	Adam8
XM_006247739.3	3.94902	6.77308	4.15e-08	Up	Igsf7
XM_006232780.2	5.5928	6.70715	0.00119418	Up	S100a9
XM_006256727.3	3.28464	6.70049	0.00136528	Up	Tfe3
NM_001005897.1	Inf	6.69263	6.29e-06	Up	Clec4e
XM_008765931.2	2.89116	6.69245	0.004091	Up	Plppr2
NM_001079890.1	77.5318	6.68586	2.43e-14	Up	Gprc5a
NM_001134602.1	19.8121	6.67442	0.000350685	Up	Mcemp1
XM_008772402.1	2.64646	6.66446	0.00210327	Up	Snx20
XM_017598814.1	2.17392	6.6571	0.00171094	Up	Rasal2
NM_031055.1	9.6571	6.65691	1.05e-05	Up	Mmp9
NM_182952.2	7.25011	6.6501	4.83e-21	Up	Cxcl11
XM_008772828.2	2.61253	6.59231	0.00227283	Up	Wdr4
XM_006244483.3	4.2575	6.58694	8.78e-06	Up	RGD1307182
XM_008769723.2	2.7449	6.5822	0.00320733	Up	Rgsl1
XM_006234324.3	5.37337	6.54752	5.57e-09	Up	Ppig
XM_006236764.3	5.04056	6.53975	0.0460943	Up	Dysf
XM_006256153.2	3.31415	6.53531	0.00249626	Up	Rab44
NM_001287114.1	15.2934	6.53373	0.00305342	Up	Vegfa
XM_017592704.1	2.38793	6.51934	3.32e-05	Up	Clec4d
XM_006230917.1	5.96267	6.51616	1.45e-07	Up	Tnfrsf22
XM_006248416.3	3.86917	6.50659	2.99e-11	Up	Stfa2
NM_138541.1	7.92279	6.49664	1.65e-06	Up	Epcam
NM_013025.2	13.0805	6.46306	1.77e-08	Up	Ccl3
XM_008769558.2	2.75491	6.45975	0.005149	Up	Ppp1r12b
NM_001013166.1	Inf	6.44732	0.00568244	Up	Gsg1
NM_001177682.1	17.5287	6.38775	0.000936889	Up	P2ry10
XM_008764211.2	2.99558	6.36246	0.0245897	Up	Pla2g5
XM_006228473.3	6.37163	6.32334	4.92e-05	Up	Bcl3
XM_008764861.2	2.9587	6.28127	0.00851401	Up	Bdkrb1
XM_008765857.1	2.89152	6.27672	3.64e-05	Up	LOC103690317
NM_001005896.1	Inf	6.27119	8.93e-05	Up	Clec4b2
NM_001108965.1	24.3609	6.25163	0.0203017	Up	Rbm38
NM_013195.1	12.6539	6.24942	0.016707	Up	Il2rb
NM_133523.3	8.06246	6.2441	0.00291321	Up	Mmp3
XM_006244493.3	4.25734	6.23791	0.0376577	Up	Treml2
NM_023987.3	9.98637	6.23545	4.21e-06	Up	Birc3
NM_001024979.1	442.153	6.23146	0.00100307	Up	Gpatch4
NM_001004095.1	Inf	6.19625	0.0060042	Up	S100a11
NM_201420.2	7.09891	6.19389	0.0283961	Up	Tfap2c
XM_008770928.2	2.68908	6.18652	0.0238634	Up	LOC103689974
XM_008763778.1	3.00956	6.18155	5.53e-13	Up	Plin2
XM_017597111.1	2.22329	6.14728	0.0480519	Up	Ctns
NM_001145828.1	18.5573	6.14531	0.0465264	Up	Tlr5
XM_008767325.1	2.84051	6.14032	6.34e-19	Up	LOC102556337
XM_017597050.1	2.22478	6.13572	0.0224158	Up	Gjc1
XM_017599430.1	2.14971	6.0997	0.0113007	Up	Prdm8
XM_008763369.2	3.0294	6.08782	1e-05	Up	Emp1
XM_006250305.3	3.74562	6.07904	0.000879444	Up	Fcgr2a
XM_006253865.3	3.41962	6.07286	0.0164272	Up	LOC103689985
XM_017599048.1	2.16429	6.06768	0.000973241	Up	LOC108352650
NM_053373.1	8.97158	6.02707	0.00457415	Up	Pglyrp1
XM_017600988.1	2.09988	6.017	0.0156343	Up	Mocos
XM_006246458.3	4.04918	6.00383	2.87e-06	Up	Nlrp3
XM_008767343.2	2.83649	5.99755	0.00360616	Up	Col6a3
NM_019155.2	11.532	5.98685	4.43e-05	Up	Cav3
NM_001037204.1	120.115	5.94276	3.83e-06	Up	Taf1a
NM_139089.1	7.77281	5.94208	1.95e-20	Up	Cxcl10
XM_017597602.1	2.21183	5.93499	0.0238035	Up	Unkl
XM_001060107.5	7.01204	5.9272	0.00374219	Up	Erfe
NM_001007015.1	Inf	5.92587	0.0319387	Up	Rnase2
NM_001032397.1	175.12	5.92443	0.0296278	Up	Tcf21
XM_017591208.1	2.46212	5.91393	0.0298229	Up	Sirpd
XM_008760073.1	3.20359	5.91245	3.18e-06	Up	LOC108348044
XM_008765397.1	2.91087	5.90823	7.57e-05	Up	Mdm2
XM_006231963.3	5.76883	5.90528	0.0305549	Up	Zfp131
NM_133555.1	8.04129	5.90408	4.97e-08	Up	Csf2rb
NM_013085.3	12.9047	5.86245	4.37e-06	Up	Plau
XM_008760420.2	3.1722	5.85667	0.0325026	Up	Ubtd1
NM_001107808.1	31.3569	5.85181	0.0423724	Up	Zbtb46
XM_008762182.2	3.0913	5.83929	0.0284162	Up	Tmem87b
NM_001107039.1	37.6387	5.82925	0.0312701	Up	Sgca
XM_006251078.3	3.65042	5.80631	0.0305016	Up	Fgfbp1
XM_008761139.2	3.13082	5.79595	0.000120865	Up	Pear1
XM_017591833.1	2.43552	5.78881	0.0435449	Up	Ntng2
XM_017601670.1	2.0711	5.78322	0.0346777	Up	RT1-N2
XM_008764099.2	3.00268	5.7806	0.0378544	Up	Ermap
XM_008769603.2	2.75357	5.75754	7.7e-11	Up	Lamc2
XM_003750048.3	6.72195	5.73346	0.000251008	Up	Sfn
XM_006245070.2	4.19127	5.7197	0.0183324	Up	Creb1
NM_053629.3	8.69948	5.7147	0.000242103	Up	Fstl3
NM_001271143.1	15.6546	5.71459	0.000546714	Up	S1pr3
NM_012559.2	14.5364	5.70899	0.0333682	Up	Fgg
XM_008761426.2	3.1142	5.68532	0.00214372	Up	Csf1
NM_053634.1	8.69283	5.66811	0.00182185	Up	Fcnb
NM_012580.2	14.4934	5.66489	4.95e-30	Up	Hmox1
NM_198775.1	7.16507	5.66229	0.000183838	Up	P4ha3
NM_020542.2	10.9346	5.6594	1.35e-05	Up	Ccr1
XM_008771691.2	2.67491	5.6432	2.41e-06	Up	Crem
XM_017598588.1	2.1798	5.63838	0.00608691	Up	LOC103690102
NM_001109439.1	22.8755	5.63553	3.63e-08	Up	LOC681325
XM_006239081.3	4.76805	5.63247	0.000492644	Up	Fgr
XM_008761099.2	3.14483	5.63098	0.0426351	Up	Fnip2
NM_001012357.1	Inf	5.62562	4.14e-05	Up	Ccl9
XM_006244106.3	4.30274	5.6024	1.41e-07	Up	Klhl40
XM_008760298.1	3.1919	5.591	3.1e-05	Up	Tmem2
XM_017590102.1	2.5114	5.58822	0.00490066	Up	Cd33
XM_006239022.3	4.78087	5.58401	7e-05	Up	Map3k6
NM_181625.1	7.28574	5.57693	0.0310938	Up	Retnlg
XM_008772729.2	2.6207	5.57379	0.0477932	Up	Fgd2
XM_001070063.5	7.00114	5.56792	0.0147858	Up	LOC689230
NM_001013062.1	Inf	5.56632	0.000166806	Up	Thbs1
NM_001002819.2	Inf	5.56596	2.14e-05	Up	Gfpt2
XM_017599475.1	2.14775	5.55429	0.00675416	Up	Lcorl
NM_001033686.1	162.312	5.55332	4.41e-05	Up	Cyp4f18
XM_006251453.2	3.62272	5.51735	0.0268148	Up	LOC100911576
XM_006243725.3	4.32205	5.51651	0.000879986	Up	Parp3
NM_001107762.1	31.8041	5.50726	0.00622007	Up	Nusap1
XM_006250955.2	3.65421	5.49753	0.00388516	Up	Rbm47
XM_006234467.2	5.33661	5.48964	0.000895652	Up	Slc43a3
XM_006246144.1	4.09085	5.47216	0.00715716	Up	Pttg1
XM_008769113.2	2.76949	5.46872	1.6e-06	Up	Sh2b2
XM_017597884.1	2.20742	5.44694	0.0423283	Up	Cd80
XM_006251252.3	3.63908	5.43614	0.00664432	Up	Sh3bp2
NM_001107053.1	37.3036	5.4307	0.00911688	Up	Nags
NM_012945.1	13.2487	5.42918	5.01e-06	Up	Hbegf
XM_006230265.3	6.06675	5.42678	0.00419736	Up	LOC308990
XM_008760001.2	3.20388	5.42207	0.0176938	Up	Ebf3
XM_006240519.3	4.58227	5.41666	0.000149549	Up	LOC100909605
XM_017600936.1	2.1034	5.40045	0.0218416	Up	Cd226
NM_001107430.1	33.6588	5.3815	0.0245616	Up	Pdpr
NM_031670.2	9.25589	5.35177	0.0026328	Up	Napsa
XM_017598519.1	2.18166	5.34715	0.0133508	Up	LOC108352449
XM_008761401.2	3.11961	5.32284	0.0020478	Up	Lrif1
NM_001289737.1	15.2868	5.31706	0.00182589	Up	Cryaa
NM_053464.2	8.87773	5.31217	0.011594	Up	Srm
NM_181382.2	7.36593	5.31015	0.000199333	Up	Gldn
XM_006227988.3	6.47909	5.27732	2.69e-05	Up	Fpr1
NM_001008518.2	Inf	5.25853	0.0011908	Up	MGC105649
XM_006250689.3	3.69279	5.23415	0.0410496	Up	Sec31a
NM_001107639.2	32.6265	5.23088	1.38e-07	Up	Prdm1
XM_006235213.3	5.24261	5.22124	0.000193582	Up	Cst7
XM_006241135.3	4.5329	5.20568	0.0208302	Up	RGD1564744
XM_017601842.1	2.06466	5.17996	4.2e-26	Up	LOC108348108
NM_001109022.1	24.1478	5.17728	7.54e-14	Up	Inmt
XM_006232012.3	5.75431	5.17676	9.59e-08	Up	Osmr
XM_006251218.3	3.6404	5.1626	0.0184761	Up	Myo1g
NM_001106629.1	45.3382	5.15956	1.33e-07	Up	Steap1
NM_001106052.1	53.2039	5.14538	0.00086285	Up	Olfm4
XM_006232337.3	5.64755	5.13963	0.0153419	Up	Postn
NM_001025051.1	340.9	5.1356	0.00901572	Up	Fam110c
XM_017590000.1	2.51473	5.13063	6.4e-05	Up	Ppp1r13l
XM_008769474.2	2.76146	5.11734	0.00404592	Up	Pign
NM_130741.1	8.18728	5.09091	2.6e-18	Up	Lcn2
XM_008767107.2	2.85302	5.07869	0.000327013	Up	Spats2l
NM_022604.2	10.2194	5.07291	0.00638664	Up	Esm1
XM_006230827.3	5.97548	5.06861	0.000291313	Up	Tnfrsf26
XM_008765458.2	2.9102	5.06487	0.033887	Up	Stk3
XM_006237100.3	4.99702	5.0635	0.00045005	Up	Clec7a
NM_017232.3	11.8924	5.05458	0.0029561	Up	Ptgs2
XM_006249820.3	3.78538	5.04736	0.00155378	Up	Ptpn7
XM_006245343.3	4.16258	5.04366	0.030631	Up	LOC100366216
NM_001108118.1	29.2255	5.03602	2.34e-07	Up	Itga5
NM_012603.2	14.3678	5.03065	7.42e-08	Up	Myc
XM_008762226.2	3.09121	5.02921	0.00995146	Up	Atp8b4
NM_017227.1	11.9214	5.02797	0.00909498	Up	Padi4
XM_006246304.3	4.08164	5.02783	1.96e-11	Up	Tnip1
NM_145672.4	7.6793	5.02772	3.05e-09	Up	Cxcl9
NM_001025733.2	197.781	5.02537	1.9e-07	Up	Procr
XM_017595083.1	2.31481	5.00226	0.0346622	Up	Plec
XM_008771523.2	2.678	4.9984	0.0317788	Up	LOC100910978
XM_008764299.2	2.97777	4.99473	0.0353053	Up	E2f2
NM_019177.3	11.4302	4.99327	0.00140979	Up	Sell
XM_008768743.2	2.78423	4.97071	4.51e-05	Up	Cd200r1
NM_001012164.1	Inf	4.97049	0.000182339	Up	Adgre5
NM_001109624.1	22.313	4.96211	0.00377126	Up	LOC691141
XM_017594814.1	2.32373	4.96062	3.3e-17	Up	Sbno2
XM_006247127.3	3.9806	4.94301	0.00243202	Up	Mmd
XM_017591816.1	2.4364	4.93252	4.31e-05	Up	Zfp217
XM_006244122.3	4.29054	4.9234	1.01e-08	Up	Csrnp1
NM_001162408.1	18.4387	4.91926	0.045855	Up	Dusp13
XM_017598697.1	2.17791	4.91749	0.0200227	Up	Kiss1
XM_006252315.3	3.53487	4.91714	2.39e-05	Up	Lrch1
XM_008771884.2	2.668	4.90975	0.0185477	Up	Fam107b
XM_008772911.2	2.60828	4.9089	0.0499644	Up	Col13a1
XM_008765045.2	2.93666	4.90844	0.00217183	Up	Pros1
NM_153733.2	7.59678	4.90599	0.0297929	Up	Serpinb10
XM_017601712.1	2.06825	4.90031	8.82e-11	Up	Egfl8
XM_008759890.2	3.20963	4.87897	0.0173217	Up	Uros
XM_006239424.3	4.71641	4.87382	0.000172433	Up	LOC102552055
XM_001076276.5	6.95022	4.86916	0.00821251	Up	LOC690948
NM_023970.1	10.0261	4.86466	4.06e-07	Up	Trpv4
NM_001108764.1	25.3742	4.86351	3.07e-05	Up	Fam219b
XM_006249400.3	3.82009	4.84166	0.035317	Up	Oas1k
NM_001191932.1	16.6688	4.83927	0.0311097	Up	Slamf6
XM_003748656.3	6.88079	4.80017	1.93e-07	Up	Tnfaip3
XM_008772623.2	2.62897	4.79822	0.0148708	Up	Taf1c
XM_008761102.2	3.13354	4.78458	5.58e-05	Up	Tlr2
XM_006242897.2	4.38715	4.7791	0.000900599	Up	Hmbs
NM_173136.1	7.47119	4.77342	0.000613147	Up	Akr1b8
NM_173840.1	7.4429	4.75181	0.0441387	Up	Lat2
XM_008758601.1	3.2693	4.74468	0.00786186	Up	Stx11
XM_017590686.1	2.47886	4.74206	0.0101952	Up	Lhfpl2
XM_008771283.2	2.68422	4.73398	0.0226391	Up	Slc7a2
NM_001107821.2	31.3522	4.73395	0.00159585	Up	Agpat2
XM_008760851.2	3.15321	4.71875	0.000195636	Up	Sirpb2l1
XM_017595419.1	2.30144	4.71519	0.0105474	Up	Ccr5
XM_008769777.2	2.74383	4.71484	0.000152704	Up	LOC100911825
XM_006241985.3	4.47625	4.70047	0.0258597	Up	C1qtnf6
XM_006242358.2	4.442	4.69914	0.022376	Up	Nr4a1
XM_008767746.2	2.82836	4.69892	0.000282205	Up	Irgm2
XM_017594908.1	2.31927	4.69068	1.84e-05	Up	Sppl2b
XM_017599051.1	2.16178	4.68105	0.0342553	Up	Evi5
NM_001024349.2	619.61	4.67496	0.022482	Up	Tnfrsf18
NM_001191939.1	16.6402	4.67462	0.0127565	Up	Msr1
XM_006232064.3	5.7145	4.66926	0.0138431	Up	Rai14
XM_017595826.1	2.28456	4.66529	0.00868759	Up	Slc37a2
XM_006243538.3	4.34189	4.65176	1.26e-05	Up	Plscr1
NM_012561.2	14.4996	4.64923	0.000330582	Up	Fst
XM_006249889.3	3.78453	4.63817	0.00120264	Up	Mybph
NM_030829.1	9.78265	4.6368	1.91e-06	Up	Grk5
XM_001055833.5	7.04757	4.63499	0.000587036	Up	Tirap
NM_133578.1	8.01697	4.62737	6.06e-15	Up	Dusp5
XM_574569.7	2.0173	4.62373	4.29e-06	Up	Itgax
NM_012904.2	13.3029	4.62253	0.00899219	Up	Anxa1
XM_017595314.1	2.30701	4.61287	0.0112307	Up	Senp1
XM_006233169.3	5.54824	4.60949	0.0472201	Up	Ampd2
XM_006252115.3	3.5527	4.60793	0.0031341	Up	Spata13
XM_006254359.2	3.40624	4.6013	0.00107333	Up	Abi1
XM_006227627.3	6.52304	4.59673	9.35e-05	Up	Ginm1
NM_001256509.1	16.3808	4.56327	3.61e-15	Up	Fosb
XM_017596794.1	2.23337	4.55851	0.000473385	Up	Il18rap
NM_053455.2	8.88334	4.55238	5.87e-05	Up	Fgl2
XM_003748711.4	6.88008	4.53941	0.0417877	Up	Lilrb1
NM_017134.3	12.1492	4.53334	0.0314747	Up	Arg1
XM_008766626.1	2.87546	4.53234	0.0369018	Up	Lrrfip2
XM_017594761.1	2.32903	4.52753	4.43e-08	Up	Nsmce2
NM_001106917.1	39.7302	4.5269	9.45e-17	Up	Pi15
XM_003748839.3	6.85149	4.52547	0.0493158	Up	LOC687679
XM_008764793.2	2.96104	4.52449	0.0169379	Up	Gpatch2l
XM_017589236.1	2.54762	4.52388	0.00029655	Up	Ano1
XM_008773268.2	2.59533	4.51844	5.51e-07	Up	Dlg3
XM_017597613.1	2.21183	4.51815	0.0433481	Up	Hbq1b
NM_153300.1	7.62215	4.51573	0.00783414	Up	Aldh1a3
XM_006234290.3	5.37583	4.51316	0.0140183	Up	Galnt3
XM_017591464.1	2.45885	4.50523	0.0173875	Up	Arfgap1
NM_001107877.1	31.0335	4.50459	2.35e-14	Up	Adamts9
XM_017597347.1	2.22091	4.50346	0.0252199	Up	C1qtnf1
NM_001011979.2	Inf	4.50156	0.0257966	Up	Tardbp
NM_001105800.1	60.7944	4.49782	0.0285623	Up	Zmynd15
NM_139342.1	7.72139	4.49056	2.93e-08	Up	Ripk3
NM_001081980.1	76.0786	4.48606	0.00480009	Up	Tbc1d10c
XM_008772775.2	2.61396	4.48435	4.21e-05	Up	LOC103694380
XM_006230053.2	6.12897	4.48146	0.0163305	Up	Tead1
XM_017593031.1	2.38305	4.48011	0.0160365	Up	Rasgef1a
XM_006230530.2	6.00852	4.47543	0.000152833	Up	Ifitm1
XM_017599572.1	2.14745	4.47353	8.04e-05	Up	Anxa7
NM_021744.1	10.6722	4.47279	8.65e-09	Up	Cd14
NM_053382.1	8.96032	4.45937	2.56e-20	Up	Tnfaip6
NM_001127529.2	21.1091	4.45935	0.0170207	Up	Glb1l
NM_001130573.1	20.2404	4.45412	8.16e-13	Up	Maff
XM_006229409.1	6.25939	4.4534	0.0219578	Up	Anpep
NM_133624.2	8.01554	4.44959	0.000264205	Up	Gbp2
NM_181086.3	7.38431	4.44691	2.7e-07	Up	Tnfrsf12a
NM_001004202.2	Inf	4.43989	0.000664458	Up	Ccl6
NM_133416.1	8.0761	4.43368	8.13e-10	Up	Bcl2a1
NM_012886.2	13.3126	4.43272	0.0202142	Up	Timp3
NM_001105796.2	60.8504	4.43198	0.0195609	Up	Acap1
XM_008759065.2	3.25208	4.4313	0.00665168	Up	Zfp526
XM_006243829.3	4.31368	4.4272	0.00706392	Up	Dhx30
NM_001008765.1	Inf	4.42557	9.13e-05	Up	Igtp
XM_006232557.3	5.6292	4.42195	0.0286404	Up	LOC100910255
NM_001014100.1	Inf	4.41657	0.00485441	Up	Neurl3
NM_199489.4	7.11453	4.40293	0.00110092	Up	Ccr7
XM_008770773.2	2.70283	4.38755	0.0101607	Up	Ptk2b
NM_013026.2	13.0721	4.38305	5.06e-06	Up	Sdc1
NM_031713.1	9.23746	4.37756	0.0115575	Up	Pirb
XM_006241392.3	4.50496	4.36418	0.0252396	Up	Lyc2
NM_013031.1	13.066	4.35898	1.95e-05	Up	Slc18a2
XM_006248482.3	3.86908	4.34144	0.0002217	Up	Lrrc15
XM_017599376.1	2.14974	4.34052	0.0302779	Up	Rbpj
XM_008759354.2	3.23309	4.33917	7.61e-07	Up	Fv1
XM_008772373.2	2.64818	4.33354	0.00119646	Up	Nod2
XM_008769534.2	2.75628	4.33231	0.00230725	Up	Ptprc
XM_017596781.1	2.23665	4.33062	0.00592136	Up	Dst
XM_017596249.1	2.26706	4.3264	0.00224194	Up	Cflar
XM_017592891.1	2.38315	4.32298	0.00109001	Up	Snrpg
XM_006252322.3	3.52941	4.31961	0.000127115	Up	Lcp1
XM_017597041.1	2.22683	4.31848	0.00371063	Up	Slc6a4
XM_008765472.2	2.90699	4.30797	0.0343757	Up	LOC103690326
XM_017595989.1	2.2802	4.29887	0.0291714	Up	Igsf9b
XM_006228047.3	6.47229	4.27994	0.0101199	Up	Lilra3
XM_006250222.1	3.7644	4.27349	0.0101288	Up	Uap1
XM_006237182.3	4.99655	4.27245	0.00877958	Up	Csgalnact2
NM_001024344.1	775.317	4.27089	0.0372793	Up	Sit1
XM_006257127.3	3.27888	4.2625	0.0328742	Up	LOC102556339
NM_017325.2	11.725	4.26214	0.0015803	Up	Runx1
XM_006250710.3	3.68967	4.25075	0.00824983	Up	Cxcl13
XM_006255836.1	3.34399	4.24894	0.0291318	Up	Pard3
XM_006255126.3	3.36409	4.24699	0.0170879	Up	Adgrg3
XM_017597996.1	2.20449	4.23917	0.000112264	Up	Parp9
XM_017589772.1	2.52632	4.23628	4.32e-07	Up	Nup98
NM_001108563.1	26.2607	4.23423	0.000113297	Up	Sypl2
XM_017590343.1	2.49437	4.2279	0.0316677	Up	Ifit1bl
NM_001047954.1	88.0193	4.22022	0.0411319	Up	LOC500028
XM_008769705.1	2.74497	4.21788	0.0165154	Up	Tnfsf18
XM_006237423.3	4.97143	4.21157	0.044111	Up	LOC689519
XM_230857.8	2.03198	4.20674	1.1e-06	Up	Zfp334
XM_006254842.3	3.3771	4.20148	0.000200528	Up	Atp8b1
XM_017600989.1	2.09793	4.19533	1.72e-07	Up	Lims2
NM_057203.1	8.26567	4.19431	0.00910438	Up	Ccl22
XM_003751721.4	6.5421	4.1863	1.69e-06	Up	LOC100909849
XM_008769873.2	2.7375	4.18147	0.0212238	Up	Batf3
NM_031531.1	9.38522	4.17572	1.25e-07	Up	Serpina3n
NM_001115043.1	21.5853	4.1725	0.00183814	Up	LOC684871
NM_183403.2	7.22031	4.17081	3.03e-15	Up	Gpx2
NM_170789.2	7.58079	4.16915	0.0117096	Up	Cd247
XM_006244554.3	4.25404	4.16085	0.0332694	Up	Runx2
XM_017590832.1	2.47201	4.158	0.00144136	Up	Mtmr12
NM_001033062.1	169.968	4.1529	0.0368023	Up	Cldn23
XM_008761501.1	3.11058	4.14793	0.000538633	Up	Sgms2
NM_153737.1	7.58506	4.14724	0.0459897	Up	Sostdc1
XM_006243206.2	4.37292	4.14674	1.54e-06	Up	Uaca
XM_006227848.3	6.49962	4.14148	6.58e-08	Up	Akap12
XM_006247372.3	3.96498	4.13822	0.00843156	Up	Etv4
XM_017597661.1	2.21018	4.13798	4.17e-06	Up	LOC103693389
NM_053663.1	8.63715	4.13784	0.000906349	Up	Vcan
NM_001270689.1	16.2646	4.13779	4.5e-07	Up	Fxyd5
NM_031325.1	9.51157	4.13636	0.00167706	Up	Ugdh
XM_017594892.1	2.31941	4.13473	0.0143586	Up	Racgap1
NM_001047899.2	91.5294	4.13312	0.0462876	Up	Fyttd1
XM_008762374.2	3.0719	4.13252	0.027468	Up	Sla2
NM_001004242.1	Inf	4.13168	7.23e-07	Up	Arhgap8
XM_008769444.1	2.76398	4.13165	0.0248331	Up	Nuak2
NM_001009632.1	Inf	4.13123	0.000259901	Up	G0s2
NM_017221.1	11.9233	4.12987	0.000234843	Up	Shh
XM_017600086.1	2.1266	4.12572	6.34e-09	Up	Arhgap22
XM_008759863.2	3.21228	4.10291	4.77e-05	Up	Il4r
XM_017601690.1	2.07048	4.1024	0.00070577	Up	Hnrnph3
NM_022667.2	10.152	4.10073	0.012011	Up	Slco2a1
XM_006250013.3	3.7756	4.09975	0.000722513	Up	Ncf2
XM_008770614.2	2.70446	4.09646	1.13e-09	Up	Ktn1
XM_017598849.1	2.17176	4.09193	6.48e-08	Up	Rgs16
NM_001009493.1	Inf	4.09041	0.00190659	Up	Oas3
NM_001107190.1	35.9339	4.07798	0.0213349	Up	Rabgap1l
XM_017593412.1	2.37054	4.0759	0.00211832	Up	Rap1gap
NM_130824.2	8.12945	4.0731	0.00767256	Up	Rasgrp4
NM_001108424.1	26.8097	4.0722	2.66e-05	Up	Rnf125
XM_017588741.1	2.58343	4.07208	2.96e-09	Up	Nav2
NM_001109078.1	23.6419	4.07056	0.000436396	Up	Slamf1
NM_030848.1	9.741	4.06983	0.0197262	Up	Bst1
NM_001108950.2	24.3851	4.06744	0.00605693	Up	Gnat2
XM_017593050.1	2.38143	4.0539	0.00548217	Up	LOC689800
XM_017601214.1	2.08699	4.04299	0.0158377	Up	Slc10a7
NM_012735.2	13.8869	4.04153	0.00349526	Up	Hk2
NM_001012008.1	Inf	4.03396	0.00239077	Up	Zfp18
XM_008772663.2	2.62225	4.03003	0.00882496	Up	Zfp469
NM_001009919.1	Inf	4.02918	0.0144134	Up	Ly49si3
NM_031535.2	9.38223	4.02597	0.000328575	Up	Bcl2l1
XM_006248059.2	3.91572	4.02355	0.000312894	Up	Cldn14
NM_001008321.1	Inf	4.02021	8.88e-05	Up	Gadd45b
NM_001105962.3	57.6455	4.01886	0.0477417	Up	Prg4
XM_001068751.5	7.00312	4.01706	0.00263503	Up	Slfn1
XM_006234237.2	5.38321	4.00749	0.00533916	Up	Rbms1
NM_001271480.1	15.5037	3.9997	0.00298257	Up	Themis2
XM_006228688.2	6.34344	3.99807	4.16e-06	Up	Actn4
XM_017590247.1	2.50374	3.99705	0.0190449	Up	Ifitm6
NM_001024282.1	829.956	3.98837	0.0240261	Up	Hist1h2af
XM_006251541.3	3.60773	3.98622	0.000261448	Up	Ahsa2
NM_212505.2	7.0631	3.9825	5.35e-07	Up	Ier3
XM_006249507.3	3.79832	3.98226	0.0321633	Up	Cmklr1
NM_133306.2	8.09795	3.97727	1.16e-05	Up	Olr1
XM_017596440.1	2.24714	3.96468	0.028627	Up	Arid5a
NM_001107043.1	37.5537	3.96321	0.0423214	Up	Tbx21
NM_012987.2	13.1039	3.96132	0.00297838	Up	Nes
NM_021836.2	10.6018	3.95825	1.05e-13	Up	Junb
NM_153473.1	7.60027	3.95642	0.000760378	Up	Myo7a
XM_008762935.2	3.04583	3.95258	0.0362683	Up	Osbpl3
XM_006229717.3	6.23007	3.94996	5.23e-05	Up	P2ry6
XM_006248177.2	3.90557	3.94789	4.72e-06	Up	Ets2
XM_008766243.2	2.88361	3.94754	1.4e-06	Up	Rnf111
NM_001077671.1	82.4928	3.94486	1.71e-05	Up	Zc3h12a
XM_008769106.2	2.77285	3.93775	0.00411217	Up	LOC100910669
XM_006243563.1	4.33972	3.93699	0.0291303	Up	Tfdp2
XM_006246895.3	4.0011	3.93665	0.0245322	Up	Slc43a2
XM_008773003.2	2.60192	3.93626	0.00652751	Up	Zbtb24
NM_012967.1	13.1447	3.93421	7.09e-10	Up	Icam1
XM_017592421.1	2.41104	3.93387	0.0153763	Up	Zfp384
XM_006229807.3	6.17399	3.92918	0.0378373	Up	Emsy
XM_006249998.3	3.78362	3.92596	0.0263324	Up	Rnasel
NM_001015020.1	2502.71	3.92515	7.5e-07	Up	Tgif1
XM_006233536.3	5.50289	3.91981	5.42e-05	Up	Cth
NM_001110491.1	21.8099	3.91782	0.00127642	Up	Fbxo27
NM_001107275.1	35.0326	3.9176	0.0491332	Up	Slc39a14
XM_008767900.2	2.81494	3.91428	0.0350671	Up	Dnah2
NM_001009681.1	Inf	3.9139	2.87e-07	Up	Oasl
XM_008766853.2	2.87137	3.91194	3.89e-08	Up	Enpp4
XM_017599329.1	2.15504	3.90784	0.0412858	Up	Grxcr1
XM_006255474.3	3.35079	3.90619	1.13e-05	Up	Fam65a
XM_008766505.2	2.88079	3.90285	0.0404891	Up	Uba7
XM_008759100.1	3.2481	3.90155	0.00167925	Up	Gmfg
NM_001039007.1	103.439	3.90022	0.0298149	Up	Hrasls5
NM_001077644.1	82.8744	3.89537	0.000130526	Up	Ptgir
NM_001025675.1	239.854	3.89464	1.56e-05	Up	Tubb6
XM_017596275.1	2.26363	3.88751	0.0279192	Up	Uxs1
NM_001012029.1	Inf	3.88149	0.00397122	Up	Mnda
NM_017076.2	12.3807	3.8794	3.69e-06	Up	PVR
XM_003751343.3	6.56986	3.87288	0.0477195	Up	LOC100911104
NM_001168284.1	18.0111	3.86629	0.0122585	Up	RGD1561778
XM_006243527.3	4.34482	3.86504	0.000937694	Up	Adamts7
XM_017602016.1	2.06156	3.85794	0.000368174	Up	Elf4
XM_006239338.3	4.73202	3.8536	2.23e-10	Up	Pdpn
NM_001109203.1	23.3857	3.85347	0.0138903	Up	Prrg4
NM_176856.2	7.42023	3.85173	0.0110484	Up	2018-09-09
XM_017601004.1	2.09619	3.84512	2e-05	Up	Pqlc1
NM_013154.2	12.6942	3.84476	2.19e-16	Up	Cebpd
XM_006233593.3	5.49027	3.84476	0.00526307	Up	Psd4
XM_006232538.3	5.63714	3.84105	0.00397655	Up	Tmem154
XM_006235424.3	5.22634	3.83803	0.0129064	Up	Tgif2
XM_006238043.2	4.89961	3.82678	0.0200858	Up	Trmt10b
NM_001106748.1	43.2954	3.82311	0.0392964	Up	Batf
NM_001270763.1	16.2105	3.81527	0.000397685	Up	Rnh1
XM_006231506.3	5.81392	3.81116	0.0260295	Up	Mfsd13a
XM_017595674.1	2.29528	3.81063	0.00166986	Up	Zbtb38
XM_017592324.1	2.41787	3.79782	0.004103	Up	LOC102554600
XM_008770852.2	2.69931	3.79749	0.0167927	Up	Rcbtb2
NM_001107163.1	36.1711	3.79741	0.000581092	Up	Zswim4
NM_145879.2	7.63602	3.79565	1.76e-10	Up	Socs1
NM_001127304.1	21.4357	3.7904	0.000736118	Up	Ncf4
NM_001191923.1	16.7934	3.79029	0.029558	Up	Pik3r5
XM_006255016.3	3.36796	3.78681	0.0428854	Up	Zfp236
XM_017589212.1	2.54787	3.78507	0.0239404	Up	Il21r
NM_019370.2	10.9598	3.7847	0.000140863	Up	Enpp3
XM_017599939.1	2.13158	3.7809	0.0123711	Up	LOC102554746
NM_001107095.1	36.7113	3.77635	4.74e-11	Up	Nfkbiz
NM_019336.1	11.1552	3.77492	8.66e-06	Up	Rgs1
XM_008771026.2	2.68749	3.7733	0.0197655	Up	Ccdc66
XM_017589854.1	2.52484	3.77133	0.00326402	Up	Epb41l2
NM_199115.2	7.12802	3.76215	3.33e-09	Up	Angptl4
XM_017592589.1	2.39596	3.7493	0.0213064	Up	Spsb2
XM_006250610.3	3.71258	3.74668	0.0126196	Up	LOC102554096
XM_006249059.3	3.83589	3.73829	0.00654732	Up	LOC681341
NM_178094.3	7.41253	3.73472	3.26e-05	Up	Itpkc
XM_006243113.3	4.3804	3.73367	0.000205511	Up	Pstpip1
NM_001106858.1	42.5846	3.73351	0.00377889	Up	Col7a1
XM_006245793.3	4.11347	3.73248	0.0195821	Up	Mgrn1
XM_006237089.3	5.00052	3.72998	0.0257982	Up	Clec1b
XM_006236128.3	5.14241	3.72778	0.00148536	Up	Tfec
XM_017599689.1	2.14561	3.72764	0.00202901	Up	Zc3h13
NM_001191565.1	17.2785	3.72219	0.00302251	Up	Ankrd33b
NM_031771.2	9.21958	3.71751	0.000455516	Up	Thbd
NM_001012086.1	Inf	3.71641	0.033355	Up	Cytip
NM_001137633.1	18.8204	3.71432	0.0225114	Up	Tnfaip2
NM_181476.1	7.3231	3.71198	9.75e-07	Up	Niacr1
NM_031832.1	9.14543	3.7096	5.18e-05	Up	Lgals3
XM_008770826.2	2.70108	3.70957	0.0353637	Up	Dok2
XM_006228220.2	6.41186	3.70934	0.00271782	Up	Leng8
NM_001109885.1	22.1565	3.70842	0.000397721	Up	Fam129b
XM_008772627.2	2.6281	3.70695	0.0112768	Up	Piezo1
XM_345156.7	2.02105	3.70678	0.0147315	Up	Itga2
XM_006253026.3	3.46965	3.70031	0.00311124	Up	Csgalnact1
XM_001072576.6	6.97455	3.69997	0.0169192	Up	Il23r
XM_017592499.1	2.40694	3.69673	0.0154479	Up	Zfand4
XM_017596751.1	2.24103	3.69613	0.0253465	Up	LOC100911548
XM_006241525.3	4.49354	3.69073	2.46e-08	Up	Mtdh
XM_008760275.2	3.1984	3.68983	0.0127469	Up	Ms4a4a
NM_001013146.1	Inf	3.68909	6.17e-08	Up	Fosl2
XM_006253216.3	3.45497	3.68486	9.99e-05	Up	Ppp1r3b
NM_031971.2	9.12473	3.6839	1.4e-14	Up	Hspa1a
NM_024400.2	9.79513	3.6833	0.000199048	Up	Adamts1
XM_008762356.2	3.07361	3.67828	0.000122765	Up	Rbm39
NM_172091.2	7.54048	3.66958	0.0420656	Up	Gcgr
XM_006236663.3	5.05585	3.6661	1.65e-05	Up	Capg
XM_006256105.3	3.32332	3.66552	0.000603579	Up	Daxx
NM_001111295.1	21.6396	3.6639	5.3e-05	Up	Hnrnpa3
NM_001191862.1	16.8197	3.66329	3.95e-13	Up	Flnc
XM_006248659.3	3.85703	3.66151	1.07e-06	Up	Mapk1
XM_017589665.1	2.5339	3.65992	0.0198189	Up	Entpd1
XM_017590468.1	2.48663	3.65543	0.0259525	Up	Dmbt1
XM_006247396.3	3.95992	3.64987	0.012157	Up	Arl5c
XM_008767756.2	2.82578	3.64645	0.0220281	Up	Mapk7
XM_008767893.2	2.81607	3.64645	0.0220281	Up	LOC100912585
XM_006234484.3	5.33161	3.64593	0.00384189	Up	Tnks1bp1
NM_001106903.1	40.7054	3.64491	0.0310289	Up	Mrpl30
NM_001031642.1	180.871	3.64331	0.0236015	Up	Serpinb1a
XM_017597421.1	2.21928	3.64327	0.000297807	Up	Kdm6b
XM_006242033.3	4.46924	3.64326	0.00056019	Up	Cyth4
NM_017119.2	12.3473	3.63976	0.00434937	Up	Gzmk
NM_001135992.1	18.9562	3.63386	2.36e-06	Up	LOC498276
NM_001106434.1	47.5884	3.63002	0.00318712	Up	Tm4sf1
XM_006254225.3	3.4085	3.62996	0.0140561	Up	Il15ra
NM_053619.1	8.71094	3.62678	0.00141334	Up	C5ar1
NM_001109678.1	22.216	3.62613	0.00273798	Up	Nadk
NM_001033703.1	157.145	3.61823	0.0306018	Up	Apobec3b
XM_008772331.2	2.64892	3.61569	1.06e-05	Up	Nlrc5
NM_001126301.1	21.5139	3.60875	0.0292657	Up	Tmc8
XM_017597509.1	2.21376	3.60869	0.00482269	Up	Epn2
XM_006235962.3	5.17626	3.60279	1.1e-06	Up	LOC103690020
NM_017058.1	12.4391	3.6018	0.0242138	Up	Vdr
XM_006248062.3	3.91406	3.59987	0.00158742	Up	Il10rb
NM_012844.3	13.5681	3.59574	0.028393	Up	Ephx1
XM_008760486.2	3.16562	3.59539	0.0276989	Up	Dnmbp
XM_008767586.2	2.8292	3.58348	0.0257366	Up	Traf7
NM_001109416.1	23.0051	3.58173	0.000212749	Up	Cd3eap
XM_006254440.3	3.39534	3.57764	4.32e-05	Up	Taf4b
XM_017595882.1	2.28412	3.57548	7.05e-07	Up	Birc2
XM_006229733.3	6.22421	3.57159	9.89e-05	Up	Dgat2
NM_017123.1	12.3345	3.56758	0.0179346	Up	Areg
XM_017595001.1	2.31646	3.56473	9.12e-06	Up	Cpne8
NM_001013430.1	Inf	3.55954	0.0244568	Up	Rhoh
NM_001191600.1	17.183	3.55893	0.00448666	Up	Fhod1
NM_032055.4	9.10643	3.55023	0.00271323	Up	Tap1
NM_134346.3	8.0027	3.55005	0.0379672	Up	Rap1b
XM_006245106.3	4.18738	3.54276	0.0474098	Up	Rpe
NM_012771.3	13.7854	3.54182	0.0117354	Up	Lyz2
XM_006246722.3	4.04019	3.53744	0.0247939	Up	Mink1
NM_001108873.1	24.6536	3.53374	0.000312899	Up	Tnfrsf10b
XM_008765025.2	2.93679	3.52757	0.0047913	Up	Cd63
NM_053649.1	8.65136	3.52701	0.0282129	Up	Kremen1
XM_017598089.1	2.194	3.52399	0.0123552	Up	Eva1c
NM_017180.2	12.0292	3.52381	1.53e-05	Up	Phlda1
XM_008770160.2	2.72689	3.51405	0.040024	Up	Tmem156
NM_001007694.1	Inf	3.51162	1.42e-08	Up	Ifit3
XM_008767232.1	2.84724	3.51032	9.65e-09	Up	Mff
NM_001144861.1	18.6084	3.49826	0.0161792	Up	Plekha7
NM_001012046.1	Inf	3.49266	2.87e-06	Up	Spry2
NM_017025.1	12.5225	3.49229	0.00192854	Up	Ldha
NM_019280.1	11.2563	3.49039	1.57e-07	Up	Gja5
XM_006234201.3	5.39605	3.49031	3.67e-05	Up	Nr4a2
XM_017600527.1	2.11703	3.48893	0.0110647	Up	Ripk1
XM_006250259.2	3.75119	3.48748	0.018769	Up	Cd244
XM_006254713.3	3.38769	3.48713	0.0103978	Up	Lox
XM_006242383.3	4.44142	3.47678	0.0121453	Up	Itgb7
NM_001109053.1	24.1106	3.46519	3.91e-06	Up	Dtx3l
NM_001011987.1	Inf	3.45984	0.0114328	Up	Glipr1
XM_017601005.1	2.09577	3.45871	3.39e-06	Up	2018-03-03
XM_017601729.1	2.06681	3.45405	0.0121044	Up	RT1-CE10
NM_053374.2	8.96611	3.45289	0.00603093	Up	Il18bp
NM_130819.1	8.14498	3.45083	0.00904512	Up	Dhrs9
NM_053805.1	8.54411	3.43984	0.00453817	Up	Snai1
NM_001034070.1	135.797	3.43957	0.0141162	Up	Tpm1
XM_008762701.2	3.06387	3.43879	0.0113437	Up	ST7
NM_001106207.1	50.643	3.43309	0.0169138	Up	Myct1
NM_020074.2	10.9487	3.43186	0.00908994	Up	Srgn
XM_008759687.2	3.21705	3.42699	1.57e-07	Up	Adm
XM_017589067.1	2.55419	3.42298	0.0112151	Up	Arntl
NM_138882.1	7.83895	3.41579	4.18e-08	Up	Pla1a
XM_017592766.1	2.38709	3.40692	0.0149696	Up	Eogt
XM_006244015.3	4.309	3.40607	0.0415743	Up	Als2cl
NM_134454.1	7.95921	3.4049	2.13e-12	Up	Angpt2
NM_001077675.1	80.0783	3.40483	0.00765304	Up	Trim72
NM_053897.2	8.38746	3.40285	8.66e-07	Up	F2rl1
XM_006235231.3	5.23755	3.40226	3.73e-05	Up	Fam110a
XM_008761583.2	3.10736	3.39335	0.0044503	Up	Fut7
NM_207601.1	7.08586	3.39242	0.00318607	Up	Plp2
NM_022715.2	10.1393	3.39079	0.00502215	Up	Mvp
NM_017208.2	11.9566	3.38788	0.0498523	Up	Lbp
XM_008773675.2	2.58865	3.38776	0.00037864	Up	LOC103694538
XM_006238144.3	4.89185	3.38602	0.0122259	Up	Frmpd1
NM_001009717.1	Inf	3.3808	0.0052754	Up	Lrg1
XM_017600469.1	2.11771	3.38061	0.0173836	Up	Pdlim7
XM_008765723.2	2.89836	3.37955	0.0421471	Up	Prr5
XM_017599002.1	2.16474	3.37526	0.0410069	Up	LOC103693683
XM_008762422.2	3.06872	3.37493	0.00166881	Up	LOC100910882
XM_006240712.3	4.57349	3.3735	0.0111898	Up	Ncapg2
XM_017595100.1	2.31283	3.36591	0.0102208	Up	B4galnt1
NM_001025137.2	307.2	3.36434	9.95e-10	Up	Ier5
XM_017593624.1	2.36736	3.36302	0.000377493	Up	Rcc1
NM_012912.2	13.3014	3.35687	1.85e-09	Up	Atf3
NM_021838.2	10.6006	3.35568	7.26e-05	Up	Nos3
XM_006228565.3	6.36408	3.35416	0.0361609	Up	Numbl
NM_001107159.1	36.1839	3.35324	0.00635412	Up	Mmp19
XM_017594292.1	2.34331	3.34276	3.73e-06	Up	Socs5
XM_008762256.2	3.08632	3.34207	0.00092253	Up	Slx4ip
XM_006233784.1	5.44626	3.33935	0.00277392	Up	Surf6
XM_008764550.2	2.96944	3.33584	0.000685797	Up	Klhl29
XM_017591667.1	2.449	3.33377	0.00241521	Up	Eif6
NM_012830.1	13.7023	3.3329	0.046575	Up	Cd2
XM_006245152.3	4.18655	3.33037	5.55e-07	Up	Fn1
NM_001134560.1	19.9678	3.32727	0.0107819	Up	Rd3l
NM_138854.1	7.89492	3.32568	0.0015679	Up	Slc38a5
XM_006240902.3	4.55565	3.32365	0.0181681	Up	Arid3a
NM_144755.2	7.69448	3.32062	0.000385734	Up	Trib3
XM_006234927.3	5.26431	3.31952	0.0263868	Up	Itpripl1
XM_006229158.3	6.30721	3.31878	0.00251061	Up	Emp3
XM_006246391.3	4.06365	3.317	0.0147387	Up	Zfp672
NM_022197.2	10.492	3.31352	1.56e-08	Up	Fos
XM_006227655.3	6.50301	3.31308	3.76e-11	Up	Bclaf1
XM_006240910.1	4.55004	3.31009	0.000203771	Up	Stk11
NM_001107110.1	36.199	3.30815	1.65e-05	Up	Cbr3
NM_022269.2	10.3766	3.30466	0.00412777	Up	Cd55
NM_001107845.1	31.1706	3.30429	0.00361209	Up	Gsap
XM_006242752.1	4.39919	3.30261	0.0002767	Up	Ets1
XM_575397.7	2.004	3.29281	7.75e-06	Up	Wnt2
NM_001107067.2	36.9035	3.29206	0.000154121	Up	Rhbdf2
NM_001109199.1	23.4641	3.2907	1.09e-05	Up	Ifih1
XM_006239152.3	4.75412	3.29034	0.0212676	Up	Zfp46
NM_001107031.1	37.8721	3.28941	2.44e-11	Up	Slfn2
XM_008762881.1	3.05392	3.28597	0.0178254	Up	Lsm5
NM_012515.2	14.8732	3.28407	0.0116677	Up	Tspo
XM_017591195.1	2.46359	3.28108	0.0439121	Up	RGD1310081
NM_017034.1	12.5091	3.27982	0.00169566	Up	Pim1
XM_006235679.3	5.22012	3.27591	0.0106771	Up	Cass4
XM_006238071.3	4.89599	3.27503	0.0313369	Up	Dnajb5
XM_008759077.2	3.24916	3.27345	0.0113645	Up	LOC103689942
NM_023985.1	9.99097	3.27159	3.45e-12	Up	Trib1
NM_012675.3	14.0318	3.26998	0.0358156	Up	Tnf
XM_006252139.2	3.54883	3.26888	0.0048545	Up	Kctd9
XM_006231863.3	5.79828	3.26	0.00231062	Up	Naip6
XM_006238245.3	4.87469	3.25659	0.000124473	Up	Col27a1
NM_001012071.1	Inf	3.25463	0.0447793	Up	Gsto2
NM_001106045.1	54.9712	3.25267	1.68e-08	Up	Sox7
NM_133542.2	8.0576	3.25114	0.0058171	Up	Igsf6
XM_006252426.2	3.51687	3.24963	2.02e-06	Up	Rbm26
XM_008772647.1	2.62494	3.24592	0.00636069	Up	Zfpm1
NM_130426.4	8.19337	3.24286	0.00211257	Up	Tnfrsf1b
XM_345363.8	2.02015	3.24238	0.000481095	Up	Cers6
NM_175758.3	7.42905	3.2345	0.00127499	Up	Slc1a5
NM_001108353.1	27.4569	3.23377	0.0459049	Up	Plac8
NM_012976.2	13.1044	3.22993	0.0400428	Up	Lgals5
NM_001100674.1	70.8786	3.22575	0.00756078	Up	Map2k3
NM_001170434.1	17.713	3.22521	0.00196482	Up	Lrrc32
NM_019216.2	11.3949	3.22459	0.000628772	Up	Gdf15
XM_006229757.3	6.21639	3.22003	0.0483645	Up	P2ry2
NM_172333.2	7.52429	3.21966	0.0120425	Up	Cthrc1
XM_002729002.3	6.91238	3.21155	0.0115976	Up	Iqgap2
XM_008761127.2	3.13178	3.21037	7.07e-06	Up	Il6r
XM_006239219.3	4.74322	3.2075	6.15e-06	Up	Ifnlr1
NM_022256.2	10.4165	3.20658	0.00131402	Up	Btc
XM_017594385.1	2.3429	3.20124	0.0351699	Up	Begain
NM_001014182.1	Inf	3.19948	0.0169668	Up	Mall
XM_006239681.3	4.6629	3.19771	0.00497512	Up	Eml4
XM_008761786.2	3.09983	3.19404	0.000259194	Up	Prrc2b
NM_053365.1	8.99588	3.19305	0.00770173	Up	Fabp4
XM_003750733.3	6.6518	3.19002	0.030205	Up	Klhl30
XM_006250048.3	3.7726	3.18978	0.0202999	Up	Abl2
NM_133290.3	8.10738	3.18973	6.15e-10	Up	Zfp36
XM_006246828.3	4.01764	3.18766	0.00259379	Up	Gas7
NM_138826.4	7.91245	3.18424	1.15e-07	Up	Mt1
XM_006249273.3	3.82656	3.18365	0.0122287	Up	Sfswap
NM_001002807.2	Inf	3.1835	1.71e-05	Up	Clic1
NM_001108610.1	25.9766	3.1821	0.00263131	Up	Stx16
XM_008771567.2	2.67688	3.18037	0.00621936	Up	Jarid2
XM_003749449.4	6.76295	3.1733	0.00126126	Up	Ptrh1
XM_006243906.3	4.31211	3.17076	0.000389346	Up	Clasp2
XM_006252791.3	3.48863	3.1695	0.000313066	Up	RGD1309676
NM_001301715.1	15.2832	3.16927	5.11e-05	Up	Cebpb
XM_006254048.2	3.4184	3.16538	0.00202099	Up	Map3k8
NM_001001511.2	Inf	3.16536	0.00195951	Up	Gcnt2
NM_001106013.1	55.2847	3.16355	0.00263996	Up	Nop14
NM_057209.1	8.25803	3.16261	0.00844846	Up	Mylk2
XM_017598018.1	2.20279	3.16017	0.00721675	Up	Bach1
NM_019386.2	10.959	3.15727	0.000507811	Up	Tgm2
XM_006231456.3	5.84543	3.1523	0.00100089	Up	Pprc1
XM_002730009.6	6.894	3.15019	0.000486792	Up	Tram2
NM_001025670.1	240.443	3.14956	0.00383309	Up	Gpat3
XM_017592872.1	2.3852	3.14955	0.00658049	Up	Hnrnpf
NM_001004246.2	Inf	3.14668	0.0140578	Up	Ttc12
NM_001025773.1	189.237	3.14534	0.00218766	Up	Tnfrsf9
NM_021578.2	10.8614	3.14533	0.00817339	Up	Tgfb1
NM_001107711.1	32.0645	3.14191	0.000414168	Up	Mov10
XM_017598355.1	2.18581	3.13766	0.0280621	Up	Dtx2
XM_008767528.2	2.83456	3.13371	0.014115	Up	Mmp25
NM_001109377.1	23.0634	3.13064	0.0487131	Up	Clec5a
NM_153294.1	7.6346	3.12826	0.00452462	Up	Npw
NM_133572.1	8.0319	3.12632	0.00496796	Up	Cdc25b
XM_017599930.1	2.1319	3.12283	0.000143327	Up	Ipo5
XM_006252835.3	3.48619	3.12093	0.026887	Up	Myo9b
NM_012588.2	14.4547	3.11983	0.00145085	Up	Igfbp3
XM_006234452.3	5.35243	3.11835	0.0183872	Up	Ctnnd1
NM_031528.2	9.40272	3.11223	0.0113705	Up	Rara
XM_008760456.2	3.16581	3.11056	0.037793	Up	Sorbs1
XM_008771262.1	2.6851	3.10943	0.0490961	Up	Cfap97
NM_001017478.1	1299.61	3.10602	4.73e-11	Up	Cxcl16
NM_001033691.1	160.259	3.0986	0.00133024	Up	Irf7
XM_006254175.2	3.41461	3.09789	7.67e-08	Up	LOC108348069
XM_017600630.1	2.11067	3.09789	7.67e-08	Up	Heatr1
XM_008761985.1	3.09442	3.0952	0.0128462	Up	Tfpi
XM_006229780.3	6.1867	3.09493	0.027979	Up	Relt
XM_008760357.2	3.17988	3.09347	0.000266965	Up	Glis3
NM_017260.2	11.7854	3.07979	0.0144998	Up	Alox5ap
XM_006239631.3	4.67748	3.07713	0.0492304	Up	Prkd3
NM_031123.2	9.56287	3.07561	3.5e-09	Up	Stc1
XM_006236628.3	5.05897	3.07336	0.00461645	Up	Rpia
XM_017601390.1	2.07908	3.07174	0.00405465	Up	Adcy7
NM_022268.1	10.4075	3.06566	0.0432945	Up	Pygl
NM_001024348.1	770.514	3.05996	0.0157558	Up	LOC500567
XM_017596957.1	2.23174	3.05866	0.000254052	Up	Mprip
XM_006247079.3	3.99019	3.05831	1.5e-08	Up	Vmp1
NM_013169.1	12.6695	3.05638	0.0445488	Up	Cd3d
XM_017599277.1	2.15539	3.04938	0.0393708	Up	Slit2
NM_001191659.1	17.1571	3.04713	0.00117551	Up	Parp14
NM_017054.1	12.4646	3.0449	0.0408522	Up	Tbxa2r
NM_012779.1	13.7819	3.04248	0.0188218	Up	Aqp5
NM_181478.2	7.30817	3.041	0.000803882	Up	Rdh10
NM_001109421.1	22.9382	3.03974	0.000749735	Up	Ebi3
NM_001108183.1	28.7419	3.03931	0.00446317	Up	Manf
XM_017595954.1	2.28245	3.03844	0.046946	Up	LOC103689995
XM_017594046.1	2.34527	3.03648	0.00130326	Up	Cyp1b1
XM_006236238.3	5.13425	3.03446	0.00333182	Up	Hilpda
XM_006246988.2	3.99123	3.03192	0.00141075	Up	Psmd11
NM_001011974.2	Inf	3.0314	0.000274107	Up	Akap2
NM_053517.2	8.86928	3.02591	0.0239129	Up	Shc1
XM_017600651.1	2.11034	3.02579	0.00010462	Up	Stam
XM_006250609.3	3.71539	3.02021	0.000723628	Up	Mpa2l
XM_008762299.2	3.0757	3.01856	0.00892207	Up	Ncoa6
NM_012654.1	14.037	3.01756	0.00713566	Up	Slc9a3
XM_008762867.2	3.05516	3.01567	0.00509481	Up	LOC103690059
XM_008767003.2	2.85555	3.01478	0.00491481	Up	Map4k4
NM_001191719.1	17.0527	3.01453	1.35e-06	Up	Jmjd1c
NM_024356.1	9.87849	3.01339	0.00511955	Up	Gch1
XM_002728917.4	6.92202	3.01239	1.33e-08	Up	Mt1m
NM_031327.2	9.51125	3.01152	6.9e-05	Up	Cyr61
NM_001012353.1	Inf	3.01133	0.00464321	Up	MGC108823
NM_001047858.3	92.6508	3.00306	1.4e-11	Up	Srxn1
XM_006245479.3	4.12749	3.0028	0.00607898	Up	Ackr3
NM_001025066.1	322.183	3.00049	1.27e-05	Up	Apol9a
XM_017593933.1	2.35743	2.99872	0.0255413	Up	LOC100910117
NM_053489.2	8.87376	2.99714	0.00549095	Up	Col18a1
NM_024127.2	9.97821	2.99659	1.48e-05	Up	Gadd45a
NM_001109541.1	22.5933	2.99532	6.84e-05	Up	Dnajb2
NM_001025750.1	191.622	2.99527	0.0169968	Up	Plek
XM_006230319.3	6.04192	2.98993	0.0232946	Up	Apobr
NM_001008384.1	Inf	2.98938	0.0378477	Up	Rac2
XM_017593108.1	2.37983	2.98897	0.00784345	Up	Pgd
NM_001037660.1	109.37	2.98865	0.0158952	Up	Csf2ra
XM_006239908.3	4.63731	2.98383	0.000490934	Up	Odc1
NM_001013065.1	Inf	2.98301	0.0322335	Up	Ggn
XM_017589707.1	2.53069	2.97287	0.0180713	Up	Pcgf5
XM_008763960.2	3.00616	2.9727	0.0250441	Up	Foxd3
NM_001009176.2	Inf	2.97066	0.0277258	Up	Trim10
NM_001025739.1	196.223	2.97064	0.0141342	Up	Rpl11
XM_006243258.3	4.35695	2.96974	0.0328524	Up	Parp16
XM_017589529.1	2.53783	2.96625	0.0125371	Up	Il22ra2
XM_006251747.3	3.59283	2.96307	0.0101888	Up	Bmp4
XM_006253929.3	3.41962	2.95887	0.000230439	Up	Fam65b
NM_001047900.1	90.9243	2.95874	0.0303289	Up	Naa25
NM_001106700.1	43.6207	2.95844	9.84e-06	Up	Isg15
XM_006237561.3	4.95438	2.95766	0.00028926	Up	Arhgdib
XM_006236955.3	5.01301	2.95685	0.00135323	Up	Foxp1
NM_001170568.1	17.6058	2.95267	9.51e-05	Up	Baz1a
NM_001044265.1	96.4899	2.95022	0.00305239	Up	Steap4
XM_006253653.3	3.44441	2.94921	0.000393467	Up	Grk6
NM_001037356.1	112.751	2.94886	0.000129721	Up	Pak1ip1
XM_006241038.3	4.53628	2.94832	0.0214533	Up	Cnn2
XM_008763787.2	3.00876	2.94825	0.0483015	Up	Tle1
XM_008772571.2	2.63202	2.94081	0.0140683	Up	Mlkl
NM_138524.2	7.94131	2.93764	3.31e-06	Up	A3galt2
XM_006248915.3	3.84106	2.93282	0.0011005	Up	Mafk
NM_031114.1	9.57981	2.9302	0.00451334	Up	S100a10
NM_001044304.1	93.2339	2.92743	0.00050081	Up	Eid3
XM_006252363.3	3.51886	2.92605	0.00198892	Up	Dgkh
XM_006248501.1	3.86906	2.92546	4.71e-05	Up	St6gal1
XM_006255953.3	3.33299	2.92539	0.0110026	Up	Ppp1r18
XM_017591117.1	2.46583	2.92235	0.0386083	Up	Gpr171
NM_153724.2	7.59716	2.91826	6.48e-07	Up	Rcan1
XM_008762246.2	3.08734	2.9172	0.002974	Up	Bmp2
NM_001034140.1	131.103	2.91528	0.0478424	Up	Baiap2l1
NM_001109236.1	23.1821	2.91156	0.0137642	Up	Nod1
NM_012552.4	14.5838	2.9076	0.0146843	Up	Cela1
NM_001005892.2	Inf	2.90134	0.016528	Up	Spi1
XM_006238978.3	4.78578	2.89664	0.0113092	Up	Tinagl1
NM_001037780.2	107.157	2.89661	0.00931949	Up	Itgb2
XM_003750455.4	6.65467	2.89586	4.02e-06	Up	Adamts8
NM_001008858.1	Inf	2.89264	0.00378056	Up	RT1-T24-1
XM_006237175.3	4.99688	2.89146	3.85e-07	Up	Cacna1c
XM_001068693.4	7.00523	2.88997	0.000603004	Up	LOC691418
XM_006256796.2	3.2843	2.88888	0.0320241	Up	Phf8
XM_008764812.2	2.95931	2.88495	2.61e-05	Up	Wars
XM_006240960.3	4.54433	2.88446	0.000111596	Up	Dot1l
NM_001007691.1	Inf	2.8844	0.000295171	Up	Prss23
NM_001137564.1	18.8472	2.88325	4.21e-11	Up	Mt2A
XM_006244412.3	4.27451	2.88087	0.00682535	Up	Nfya
XM_017589878.1	2.5219	2.87245	0.00156204	Up	LOC108349511
NM_133424.2	8.06902	2.86508	0.0137466	Up	Actn3
XM_008759636.2	3.21816	2.8609	0.000451935	Up	Ctsc
XM_008770275.2	2.71661	2.85329	0.00550488	Up	Limk2
XM_006239459.3	4.71641	2.85249	0.00490312	Up	H6pd
NM_001109535.1	22.6817	2.84994	0.00963064	Up	Rab20
XM_008760352.1	3.1806	2.84973	0.017243	Up	NEWGENE_1565505
XM_017597642.1	2.21081	2.84951	0.0002609	Up	LOC108348082
NM_001002016.2	Inf	2.84701	0.00215477	Up	Lmna
NM_019357.1	11.0989	2.84222	1.5e-05	Up	Ezr
NM_031538.2	9.35505	2.84124	0.037857	Up	Cd8a
XM_008768989.2	2.78145	2.84098	0.00506778	Up	Stard13
XM_017596099.1	2.27142	2.8402	0.0499466	Up	Col12a1
XM_006230811.3	5.98053	2.83866	0.00403944	Up	Fermt3
NM_031776.2	9.19752	2.83847	0.0198733	Up	Gda
XM_006235868.3	5.21186	2.8335	6.26e-07	Up	Ptpn12
XM_006230040.2	6.12952	2.83299	0.00579575	Up	Btbd10
XM_003749932.4	6.73657	2.83251	0.0146419	Up	Slc25a51
XM_006250473.3	3.71942	2.83232	0.00851019	Up	Hsd11b1
XM_006236839.3	5.03163	2.8276	0.000425549	Up	Arhgap25
NM_012931.1	13.2698	2.82518	0.0475029	Up	Bcar1
XM_006235367.2	5.22669	2.82413	0.0197901	Up	Bpifa6
XM_017590783.1	2.47289	2.82401	0.00376686	Up	Usp53
XM_001071128.6	6.99123	2.82139	0.0291461	Up	Mmrn1
NM_053383.1	8.95448	2.8203	4.02e-06	Up	Cd93
XM_006256080.3	3.32666	2.81985	0.016457	Up	Lst1
NM_001271123.1	15.6796	2.81713	0.0055667	Up	Nrg1
NM_001033998.2	141.799	2.81554	0.0145856	Up	Itgal
NM_001031638.1	182.028	2.80843	0.0167661	Up	Cd68
XM_006254758.3	3.3852	2.80759	0.0282611	Up	LOC100910979
XM_017598824.1	2.17339	2.80555	0.0154369	Up	Gorab
XM_006230450.3	6.01857	2.80492	0.000907267	Up	Ptpre
XM_006245220.1	4.16757	2.8021	3.91e-05	Up	Slc11a1
XM_006239772.3	4.6507	2.79706	0.0276359	Up	RGD1304963
XM_006236129.3	5.14213	2.79676	2.22e-07	Up	Met
XM_003749409.4	6.79537	2.7964	0.00263146	Up	LOC685067
XM_008761709.2	3.1009	2.7959	0.0182174	Up	Prpf40a
XM_006251758.2	3.59079	2.79517	0.0112293	Up	Fermt2
XM_008770814.2	2.70253	2.79349	0.0096855	Up	Ppp3cc
XM_001066960.6	7.01055	2.79161	0.00540737	Up	LOC688442
NM_001305240.1	15.2335	2.79119	0.000146325	Up	Xrn1
XM_017589060.1	2.55431	2.78918	0.000398253	Up	Fcgrt
NM_001109077.1	23.9101	2.78862	0.00925847	Up	Arhgap30
XM_017589344.1	2.54564	2.78742	0.0472502	Up	Zfp52
NM_001077640.1	83.5694	2.78534	1.18e-09	Up	Gadd45g
XM_006231503.3	5.81654	2.78257	0.00182292	Up	Nfkb2
NM_001309820.1	14.9927	2.77757	0.000386591	Up	Chi3l1
XM_017591684.1	2.44759	2.77642	0.0017213	Up	2018-03-07
XM_008761535.2	3.10968	2.77353	0.00270273	Up	LOC103691715
NM_001107902.1	30.5377	2.7696	0.0107551	Up	Sox17
XM_017596378.1	2.25406	2.76704	0.00693429	Up	Sp110
NM_019235.2	11.3253	2.76078	0.00872305	Up	Ggt5
NM_001012089.1	Inf	2.75592	0.00196664	Up	Dusp2
XM_006254192.3	3.41439	2.75403	1.63e-09	Up	Pfkfb3
XM_008767238.2	2.84574	2.75398	2.2e-06	Up	Tmbim1
NM_001008385.1	Inf	2.74758	0.000152987	Up	Pmaip1
XM_008765424.2	2.91067	2.74112	2.76e-05	Up	Ptprb
NM_001191859.1	16.8316	2.73948	1.24e-05	Up	Rbm33
XM_006250630.3	3.71248	2.73437	0.00136096	Up	Nudt9
XM_003748825.4	6.85279	2.73388	0.0456613	Up	Nfkbid
XM_017595717.1	2.29075	2.73374	0.00106157	Up	Taf1d
XM_008759054.2	3.25516	2.73102	4.87e-05	Up	Relb
XM_006248588.3	3.8584	2.73067	0.000162095	Up	LOC102551435
NM_030863.1	9.71233	2.72779	0.00169945	Up	Msn
XM_017602192.1	2.05537	2.72621	0.00187876	Up	Tlr13
XM_006230329.3	6.03582	2.72586	1.97e-05	Up	Taok2
XM_006234903.3	5.26449	2.72319	0.00663175	Up	Fgf7
XM_017599156.1	2.16067	2.72095	2.99e-05	Up	Lrrc8d
XM_006251087.1	3.64456	2.71906	0.000157484	Up	Lyar
NM_001009536.1	Inf	2.71701	0.000237168	Up	Trim25
NM_031804.1	9.17304	2.7166	3.75e-06	Up	Cish
XM_006237334.3	4.97885	2.71586	0.011199	Up	Tnfrsf1a
XM_006243692.1	4.32733	2.71169	0.0421599	Up	Rnf123
NM_001191784.1	16.901	2.70975	0.00220315	Up	Srgap1
NM_001012133.1	Inf	2.70574	0.0161139	Up	Sp140
NM_053485.2	8.87382	2.70554	0.0360671	Up	S100a6
XM_008764491.2	2.97074	2.70111	0.00111509	Up	Nlrc4
XM_006241370.3	4.51547	2.70108	0.00882319	Up	Cnot2
NM_012649.2	14.077	2.70074	0.0020353	Up	Sdc4
NM_133546.3	8.0502	2.70001	1.57e-07	Up	Ppp1r15a
XM_017600090.1	2.12652	2.69695	0.00117458	Up	Ell
XM_008769253.2	2.76857	2.69615	0.0147313	Up	Clip1
XM_003751622.4	6.5509	2.69426	0.000344971	Up	LOC100910163
NM_001170541.1	17.6485	2.69267	0.00567684	Up	Natd1
XM_006233597.3	5.48892	2.69223	0.00408555	Up	Zmynd19
XM_017597474.1	2.21537	2.69214	0.00497935	Up	Ern1
NM_133392.1	8.08098	2.69161	2.31e-05	Up	Stk17b
NM_001025283.1	300.782	2.68923	0.00017992	Up	Fam118b
XM_006252903.3	3.476	2.68909	0.0273508	Up	Gmip
NM_001029924.1	187.493	2.68796	2.43e-05	Up	Stra6
NM_001170595.1	17.6034	2.68756	0.0164854	Up	Gpr132
XM_003749135.4	6.8369	2.68227	0.0206556	Up	LOC100912218
XM_017601637.1	2.07168	2.67985	0.0373492	Up	RT1-CE5
NM_001192004.1	16.552	2.67843	6.12e-08	Up	Rps6ka3
NM_031979.3	9.12443	2.67827	0.0373099	Up	Ybx3
NM_080782.3	8.24834	2.67454	3.46e-09	Up	Cdkn1a
NM_001044279.1	96.1317	2.67245	0.0375514	Up	Liph
NM_001077674.1	82.2793	2.67166	0.0237215	Up	Hlx
XM_577868.7	2.00297	2.67114	0.00175332	Up	Npm3
NM_134360.1	7.97409	2.67023	0.0266377	Up	Cd40
NM_001172120.2	17.5662	2.66876	2.54e-05	Up	Tlr1
XM_008766079.2	2.8873	2.66733	9.94e-05	Up	LOC100911068
NM_001308254.1	15.077	2.66428	0.000394759	Up	Ahr
NM_012523.2	14.8143	2.66405	0.00936316	Up	Cd53
NM_198130.1	7.20971	2.66369	1.42e-06	Up	Myd88
XM_008765561.1	2.89918	2.66022	0.0417588	Up	Eef1d
XM_017595113.1	2.31057	2.65965	5.25e-05	Up	Myl6
XM_017594017.1	2.35586	2.65835	0.00906829	Up	Mark3
XM_017594468.1	2.34209	2.657	0.0127883	Up	Plekhg3
NM_001100749.1	70.5375	2.65519	0.00372176	Up	Mxd1
NM_001191828.1	16.8643	2.65212	0.000245033	Up	Scyl3
XM_006243624.3	4.33703	2.65128	0.0193358	Up	Armc8
NM_001202463.1	16.4672	2.65059	0.0290413	Up	Cd300le
NM_001013127.1	Inf	2.64922	0.00721306	Up	Tagln2
XM_006249204.3	3.83081	2.64796	0.00077863	Up	Cux1
NM_001191555.1	17.4325	2.64652	0.00522223	Up	Rab11fip1
NM_183332.1	7.22248	2.64602	0.0421041	Up	Myadm
XM_006247206.1	3.97625	2.64395	0.0235504	Up	Fam117a
NM_001109968.1	21.9191	2.642	0.000824159	Up	Gls
NM_012610.2	14.3677	2.6412	0.00915447	Up	Ngfr
NM_001105924.1	58.9863	2.64022	0.0462275	Up	Zbed5
XM_006241500.3	4.4966	2.63925	0.0119414	Up	Agap2
NM_001108778.1	25.2816	2.63608	0.000597596	Up	Rrp9
NM_019242.1	11.3001	2.63217	3.77e-08	Up	Ifrd1
NM_001129880.2	20.7862	2.62419	0.0203009	Up	Lbh
NM_022266.2	10.4152	2.62408	0.00226918	Up	Ctgf
XM_006228343.3	6.4079	2.62119	0.00258933	Up	Gltscr1
XM_006255917.3	3.33365	2.61938	0.000217068	Up	RT1-S3
XM_006244109.2	4.30082	2.61577	0.00075486	Up	Abhd5
XM_006230837.3	5.964	2.61564	0.0400448	Up	Tmem134
NM_017154.1	12.1339	2.61296	0.0489457	Up	Xdh
NM_019289.2	11.2386	2.61003	0.00953648	Up	Arpc1b
XM_003751077.4	6.61008	2.6095	0.00144292	Up	LOC100360218
XM_008762747.2	3.06354	2.60938	0.0467743	Up	LOC103690019
XM_017588911.1	2.55963	2.60599	0.0349171	Up	Sipa1l3
NM_001169138.1	17.7277	2.60551	3.11e-09	Up	Thbs2
NM_001135009.1	19.1881	2.6041	0.00185392	Up	Col4a1
XM_006247257.3	3.9762	2.60386	1.95e-08	Up	Stat3
NM_001146125.2	18.4652	2.60092	5.99e-06	Up	Fpgs
NM_001108569.3	26.0005	2.59587	0.000683284	Up	Gbp5
XM_017599192.1	2.15605	2.5954	0.0258488	Up	Limch1
NM_001008398.2	Inf	2.59355	0.00311956	Up	Gimap9
XM_017598485.1	2.18208	2.59022	0.0197104	Up	LOC683674
NM_031140.1	9.53128	2.58942	0.024767	Up	Vim
XM_006249578.3	3.79457	2.589	0.0447353	Up	Myo18b
XM_008768102.2	2.80413	2.58849	3.26e-08	Up	Tmem100
XM_006248783.3	3.84901	2.58701	0.0261532	Up	Stxbp2
XM_006234100.1	5.39975	2.58619	0.000575326	Up	Nek6
NM_001025041.1	366.891	2.58512	3.2e-05	Up	Ier5l
XM_006233424.3	5.51473	2.58347	0.042319	Up	Gbp4
XM_341029.7	2.02548	2.58234	0.0166409	Up	Medag
XM_008772057.2	2.66563	2.58092	0.0426934	Up	Ecscr
XM_006238209.2	4.87887	2.58058	0.000127116	Up	Ptbp3
NM_001047871.1	91.7312	2.58044	0.0132427	Up	Ifrd2
XM_017592500.1	2.40684	2.58027	0.020413	Up	Snca
NM_001013147.1	Inf	2.58006	0.00420723	Up	Axl
NM_012935.4	13.269	2.57906	0.00266521	Up	Cryab
XM_006252874.3	3.4813	2.57628	0.015114	Up	Crlf1
NM_019285.2	11.2534	2.57325	6.66e-05	Up	Adcy4
NM_001109411.1	23.0148	2.57009	0.0177756	Up	Plpp5
NM_144752.2	7.71632	2.56922	1.1e-06	Up	Oas1b
NM_019905.1	10.9502	2.56838	0.0127772	Up	Anxa2
NM_013185.3	12.6665	2.56785	0.00108317	Up	Hck
XM_006246823.3	4.03161	2.56733	0.0350602	Up	Alox15
NM_001107760.1	31.851	2.55889	2.21e-06	Up	Dll4
XM_017594481.1	2.34034	2.55835	0.000143939	Up	Susd6
NM_001037201.1	120.62	2.55386	0.000468191	Up	Ddx21
NM_001108977.1	24.2628	2.54972	0.00237525	Up	Epha2
XM_006237708.3	4.94906	2.54731	0.00830191	Up	RGD1309621
NM_001083337.1	76.0044	2.54016	0.00358678	Up	Pinx1
NM_001107907.2	30.3452	2.53951	0.0102108	Up	Fam46b
NM_001007735.1	Inf	2.53895	0.00020804	Up	Sertad1
XM_017599980.1	2.13144	2.53819	0.00773374	Up	Sh3bp5
XM_008759166.2	3.23952	2.53813	0.0255793	Up	Tyrobp
XM_017596709.1	2.24155	2.53652	0.017841	Up	Ticam1
NM_019163.3	11.5275	2.53627	0.0442602	Up	Psen1
NM_001009541.1	Inf	2.53562	4.71e-08	Up	Ier2
XM_006238950.3	4.79096	2.53537	0.0024629	Up	Col16a1
XM_017590238.1	2.51018	2.53495	0.00400792	Up	LOC100911413
XM_006236102.3	5.14871	2.53424	0.00252707	Up	Mdfic
NM_001106268.1	49.8106	2.5297	0.00312523	Up	Chsy1
XM_017600925.1	2.10421	2.52903	0.0252421	Up	Rbbp8
XM_003749295.4	6.8071	2.52828	7.66e-05	Up	LOC100909712
XM_008764464.2	2.97287	2.52693	0.000693427	Up	Ttc7a
NM_001037973.1	103.623	2.52619	0.00889744	Up	Dusp9
NM_017258.1	11.8131	2.52464	0.0347376	Up	Btg1
XM_006241018.2	4.54187	2.52357	0.00479984	Up	Apba3
XM_008762279.2	3.07956	2.51491	2.09e-06	Up	Rrbp1
NM_001008842.1	Inf	2.51265	1.2e-07	Up	RT1-CE4
XM_006229071.2	6.31462	2.51057	0.00115158	Up	Plekha4
XM_008771578.2	2.67509	2.50971	0.00179955	Up	Gcnt6
NM_001007754.1	Inf	2.50943	0.000982739	Up	Rassf1
XM_006247870.2	3.9377	2.50583	0.00967349	Up	Baiap2
XM_017591537.1	2.44912	2.49762	0.000436833	Up	Odf2
XM_006239707.3	4.65973	2.49651	0.0222177	Up	Thada
XM_017591473.1	2.45538	2.49518	0.00621434	Up	Ptpn1
NM_012711.1	13.9077	2.49496	2.14e-05	Up	Itgam
XM_006228881.3	6.33808	2.49292	0.00115271	Up	Cep89
XM_006252878.3	3.47938	2.49207	0.000295347	Up	Mau2
XM_008761404.2	3.11796	2.49189	0.0439399	Up	Slc25a24
XM_006244853.3	4.21623	2.49064	0.0124395	Up	Tpp2
XM_006247314.3	3.96631	2.48915	0.00145588	Up	Dhx58
XM_008759051.2	3.25651	2.48717	0.00412191	Up	Dmpk
XM_006255410.2	3.35184	2.48583	0.0213851	Up	Gypa
NM_001014216.1	Inf	2.48555	8.27e-05	Up	Nabp1
NM_053857.2	8.43043	2.48528	0.00297764	Up	Eif4ebp1
XM_006239122.3	4.76086	2.48357	0.0207624	Up	Fam110d
NM_001014110.1	Inf	2.48309	0.045986	Up	Prickle3
NM_001007667.2	Inf	2.48279	0.00523436	Up	Sat1
NM_001134507.1	20.1209	2.47938	0.0015382	Up	RGD1309350
XM_006247309.3	3.96903	2.47793	0.0436948	Up	Krt16
NM_001014166.1	Inf	2.47496	0.000253988	Up	Il33
NM_001108489.1	26.6109	2.47424	0.00831325	Up	Iqgap1
XM_006233280.3	5.52196	2.47412	0.0197087	Up	Mcub
XM_017593375.1	2.37315	2.47379	0.011442	Up	Mier1
XM_017595626.1	2.29819	2.47353	0.0435441	Up	Ppp2r1b
NM_001107996.1	29.8635	2.47273	0.00844748	Up	Klhl21
NM_001107109.1	36.2512	2.47203	0.0443565	Up	Morc3
NM_001006987.1	Inf	2.47058	0.0447586	Up	Spg21
XM_017600254.1	2.11978	2.47054	0.0211807	Up	Fgfr1
NM_022516.5	10.2389	2.46929	0.0035464	Up	Ptbp1
NM_001111269.1	21.6725	2.46669	9.5e-09	Up	LOC689064
NM_031005.3	9.66956	2.46518	0.000104738	Up	Actn1
NM_012591.1	14.3837	2.4642	8.14e-07	Up	Irf1
NM_053313.1	9.04474	2.46374	0.0226734	Up	F2rl2
XM_006248521.3	3.86335	2.46329	5.77e-05	Up	Rtp4
NM_053696.1	8.61005	2.46142	0.000104359	Up	Rbm3
XM_006229917.3	6.14484	2.46019	0.00593173	Up	Trim30
NM_001107288.1	34.9469	2.4592	0.00087635	Up	Flnb
NM_001106425.1	47.9682	2.45859	0.000101118	Up	Armc1
XM_006251782.3	3.58449	2.45688	0.0393563	Up	Gnpnat1
NM_001106090.1	52.3091	2.45605	0.0178315	Up	Whsc1l1
NM_012862.1	13.4235	2.45435	0.0408932	Up	Mgp
XM_006237572.3	4.95411	2.45322	0.0227075	Up	Ptpro
XM_006251889.3	3.56577	2.4503	0.0135774	Up	Tmem55b
NM_001011898.1	Inf	2.45017	0.0148919	Up	Hcls1
XM_008772291.2	2.65169	2.4499	0.00741032	Up	Kifc3
XM_006252800.3	3.48707	2.4482	0.0129074	Up	Med26
NM_053294.4	9.06538	2.44793	0.000316764	Up	Adora2a
NM_001105971.1	56.8564	2.44526	0.0158959	Up	Slamf9
NM_001129997.1	20.5203	2.44503	0.0114622	Up	Ehbp1l1
NM_012708.2	14.0217	2.44304	0.0389244	Up	Psmb9
NM_001128155.1	20.7904	2.4422	2.68e-05	Up	Tmem88
NM_013153.1	12.7249	2.44065	1.07e-05	Up	Has2
XM_006250998.3	3.65161	2.43827	0.000925832	Up	Rell1
NM_031642.4	9.306	2.43703	1.79e-08	Up	Klf6
XM_008759821.2	3.2137	2.43567	0.017107	Up	LOC499229
NM_177928.3	7.41686	2.43565	0.000312362	Up	Nampt
NM_001008510.1	Inf	2.43333	0.0220679	Up	Isg20
XM_008767561.2	2.83274	2.43289	0.00515882	Up	Stk10
XM_006235126.3	5.24446	2.4319	0.0123968	Up	Sec23b
NM_001107192.1	35.8177	2.42977	0.0211728	Up	Klhl20
NM_001034088.2	133.401	2.42722	1.28e-05	Up	Carm1
NM_053764.1	8.54569	2.42591	0.0240776	Up	Rgs14
XM_008767942.2	2.81181	2.42326	0.0404657	Up	Rph3al
XM_006250633.3	3.70292	2.42213	0.00528514	Up	Aff1
XM_008770296.2	2.71497	2.4217	0.00487353	Up	Eif4enif1
NM_001007721.1	Inf	2.42019	0.0277222	Up	Emp2
XM_006240143.2	4.6222	2.41592	0.0354091	Up	Prpf39
XM_006254223.3	3.4089	2.41457	7.89e-06	Up	Fam208b
XM_017592521.1	2.40127	2.41371	0.00334269	Up	Phtf2
XM_006232019.3	5.75002	2.41084	0.0288143	Up	Fyb
XM_008759616.2	3.22216	2.40888	0.000973127	Up	Cemip
XM_006239770.3	4.65249	2.40836	0.000783145	Up	Wdr43
NM_017244.1	11.8893	2.40583	0.000467471	Up	Crabp2
NM_001134992.1	19.3048	2.40403	0.00542254	Up	Sash3
NM_001136124.1	18.885	2.40062	0.000655549	Up	Ifitm3
XM_008762289.2	3.07892	2.40004	0.000529268	Up	Ralgapa2
XM_006246109.2	4.0913	2.39804	0.00014418	Up	Sh3pxd2b
NM_001270861.1	15.8926	2.39479	0.0168419	Up	Slc4a7
XM_006246469.3	4.04898	2.39437	0.00859461	Up	Shmt1
XM_008758890.2	3.26473	2.39376	0.0012767	Up	Zfp180
XM_008767781.2	2.82365	2.39232	0.0242931	Up	Zfp496
NM_053555.1	8.80095	2.3912	0.00038895	Up	Vamp5
XM_017596404.1	2.2538	2.39079	0.00375057	Up	Satb1
NM_001109585.1	22.4504	2.38816	6.22e-07	Up	Trim47
XM_017595846.1	2.28434	2.38794	0.018565	Up	Il20rb
XM_006229884.2	6.16793	2.38681	0.0330007	Up	Trim21
XM_008770448.2	2.71022	2.3859	0.000781418	Up	Rel
XM_006242724.3	4.40202	2.3858	0.0391514	Up	Herpud2
XM_017600595.1	2.11471	2.38549	0.031235	Up	Rnf44
XM_017594573.1	2.33714	2.38408	0.00109596	Up	Akap8
NM_001109016.1	24.1966	2.38259	0.0350599	Up	Bmx
NM_012618.2	14.276	2.38243	0.00856718	Up	S100a4
XM_006242323.3	4.44214	2.37429	0.0194026	Up	Smagp
NM_001008295.1	Inf	2.37222	0.0267174	Up	Fip1l1
NM_001100836.1	67.8204	2.37187	0.01853	Up	Fcgr1a
NM_001025415.1	295.598	2.36684	1.65e-05	Up	Ch25h
NM_019361.1	10.9945	2.36631	1.78e-06	Up	Arc
XM_017594141.1	2.34361	2.36528	0.0177252	Up	Zbtb1
NM_001014090.1	Inf	2.36421	0.00870438	Up	Oaf
XM_006239185.3	4.75031	2.36244	0.027504	Up	Srrm1
NM_212495.1	7.06372	2.36237	1.68e-07	Up	Brd2
NM_013138.1	12.8018	2.36236	0.00142241	Up	Itpr3
XM_006248573.3	3.8608	2.36048	0.00342087	Up	Ece2
XM_017590894.1	2.472	2.36015	0.043673	Up	Pmvk
XM_017591856.1	2.43408	2.35483	0.0151563	Up	Dennd1a
NM_138847.1	7.91084	2.34703	0.00319475	Up	Nip7
NM_019316.1	11.216	2.34505	0.0102648	Up	Mafb
NM_017365.2	11.6465	2.34398	0.0129966	Up	Pdlim1
NM_134353.3	7.98217	2.34328	0.0425499	Up	Pabpc1
XM_017601317.1	2.08005	2.33817	0.00882467	Up	Ranbp10
XM_006252537.3	3.50421	2.33795	8.26e-05	Up	Zmiz1
XM_006231325.3	5.8919	2.33642	0.0335791	Up	Myof
XM_008760487.2	3.16492	2.33482	0.0370817	Up	LOC681458
NM_001191743.1	17.0347	2.33358	0.0117143	Up	Samhd1
NM_001025643.1	246.694	2.33327	0.000137341	Up	Fbl
XM_008759555.2	3.22303	2.33147	0.0489521	Up	Furin
XM_006233779.2	5.45631	2.32741	0.00215508	Up	Phyhd1
NM_021846.2	10.5914	2.32568	8.01e-07	Up	Mcl1
NM_031237.1	9.52121	2.32497	0.00191614	Up	Ube2d3
NM_031716.1	9.2316	2.32382	0.0257093	Up	Wisp1
NM_053821.2	8.50181	2.32208	0.000669666	Up	Ralb
NM_001109225.1	23.254	2.32107	0.00414714	Up	Zfp800
XM_008771417.2	2.67968	2.32093	0.00530757	Up	Col4a2
XM_008767546.2	2.83403	2.32035	0.0107687	Up	Npm1
NM_001014071.1	Inf	2.31806	7.52e-07	Up	Errfi1
XM_006241819.3	4.48178	2.31581	0.024107	Up	Scrib
XM_006241987.2	4.47395	2.31366	0.000596617	Up	Card10
XM_017592476.1	2.40949	2.31122	0.0101486	Up	Cd9
XM_006236922.2	5.01903	2.30987	0.00416441	Up	Fbln2
XM_017602164.1	2.05755	2.3087	1.13e-05	Up	Pls3
NM_001105947.1	57.9475	2.30862	0.0194523	Up	Wdr83os
XM_006252726.3	3.49021	2.30717	1.36e-06	Up	Wapl
NM_001244867.1	16.3811	2.30715	0.0382205	Up	Crip1
XM_017593257.1	2.37981	2.30458	0.00952949	Up	Bnc2
NM_001011936.1	Inf	2.3036	2.76e-07	Up	Bag3
NM_001134998.1	19.1929	2.30355	0.024401	Up	Zfp951
NM_001025650.1	246.676	2.29817	0.000174787	Up	Dusp11
XM_006235689.1	5.2152	2.29267	0.00215684	Up	Pmepa1
NM_178097.2	7.40696	2.2916	0.045366	Up	Sla
NM_001009678.1	Inf	2.29092	0.00196063	Up	Nepro
XM_006232215.3	5.67981	2.29038	0.033483	Up	Fndc3b
XM_006229570.3	6.23851	2.28989	0.0386911	Up	Flna
NM_001106461.1	47.3836	2.28928	4.2e-06	Up	Rhoc
NM_001008562.1	Inf	2.28764	3.25e-06	Up	Lmcd1
XM_006233447.3	5.50758	2.28747	0.036221	Up	Odf2l
XM_006240152.2	4.61767	2.28655	0.00645519	Up	Frmd6
NM_023092.1	10.0763	2.28531	0.0124558	Up	Myo1c
XM_006248320.3	3.88614	2.28306	1.15e-05	Up	Qtrt2
XM_225259.9	2.04247	2.27973	0.00278289	Up	Dsp
XM_017596521.1	2.24676	2.27917	0.00278115	Up	Wdr12
XM_008760673.2	3.15886	2.27877	0.0470598	Up	Utp15
NM_001013137.2	Inf	2.27872	0.0149975	Up	Cxcl14
NM_176078.2	7.42629	2.27425	0.0173179	Up	Clic6
XM_006252300.3	3.53679	2.27279	0.0239422	Up	Fndc3a
NM_001014078.1	Inf	2.26852	0.00965846	Up	Wdr89
XM_017594640.1	2.3332	2.26819	0.00540434	Up	Giot1
XM_008765376.2	2.91752	2.26586	0.0128365	Up	Usp15
XM_006234571.3	5.30871	2.26476	0.021443	Up	Tp53i11
NM_021691.2	10.7554	2.2634	0.0413709	Up	Twist2
NM_001271710.1	15.4826	2.26031	0.0038614	Up	Angptl8
NM_053652.1	8.65054	2.25989	0.000736405	Up	Flt4
XM_006252603.2	3.5009	2.25927	0.011676	Up	Il17rb
XM_017592427.1	2.41075	2.25875	2.95e-06	Up	Podxl
NM_001108902.1	24.4689	2.25775	1.21e-05	Up	Rab32
NM_001108355.1	27.3491	2.25727	0.00333605	Up	Cnot6l
XM_006255843.1	3.33909	2.25456	0.0428567	Up	LOC102556297
NM_001007677.1	Inf	2.25447	0.0383901	Up	Lyl1
XM_017590592.1	2.48633	2.25299	5.41e-05	Up	Eif4e
XM_006255394.1	3.35492	2.24918	3.71e-05	Up	Smad1
NM_001008773.2	Inf	2.24803	0.000129767	Up	Eif1a
XM_008767868.1	2.82168	2.24802	0.00131234	Up	Clec10a
XM_008764964.2	2.93854	2.24349	0.00387425	Up	Zbtb42
XM_006248535.3	3.86292	2.24336	0.00172619	Up	Eif4a2
NM_030987.2	9.68607	2.24316	0.0331748	Up	Gnb1
XM_008773009.2	2.599	2.24196	0.0177453	Up	Mcm9
NM_017353.1	11.7131	2.23839	0.0186277	Up	Slc7a5
NM_001107407.1	33.7939	2.23832	2.05e-05	Up	Cdh5
XM_006257141.3	3.27888	2.23769	9.79e-05	Up	Rlim
NM_012759.2	13.802	2.237	0.0131824	Up	Vav1
NM_001013158.1	Inf	2.235	1.64e-05	Up	B3galnt1
NM_001024771.1	551.135	2.23211	3.29e-05	Up	Tnip2
XM_017602039.1	2.06073	2.23185	0.00742519	Up	Klhl15
XM_006247184.3	3.98042	2.22927	0.0399051	Up	Phospho1
XM_006232387.2	5.6432	2.22719	0.0185278	Up	Tsc22d2
NM_001106902.1	40.8362	2.22656	0.0136208	Up	Sema4c
NM_133298.1	8.10358	2.22573	1.93e-06	Up	Gpnmb
XM_017594875.1	2.32043	2.22025	0.0274142	Up	Alg12
XM_017589726.1	2.5279	2.21895	0.0331456	Up	Stambpl1
XM_006239006.3	4.78247	2.21876	0.000388469	Up	Gpr3
XM_008761029.1	3.1455	2.21744	5.51e-06	Up	Ccnl1
XM_008760722.2	3.15577	2.21445	0.0113891	Up	Pde4d
NM_001037648.1	111.6	2.21329	0.000554527	Up	Fam105a
XM_017600835.1	2.10663	2.21328	0.0102025	Up	Slc26a2
NM_021754.1	10.6364	2.21105	8.97e-05	Up	Nop58
NM_173100.2	7.50369	2.20858	0.00256566	Up	Bdkrb2
NM_001110055.1	21.9082	2.20713	8.32e-07	Up	RGD1564664
XM_006248504.3	3.86653	2.20226	5.77e-05	Up	Il1rap
XM_017592383.1	2.41562	2.20092	0.000562977	Up	Zyx
NM_001305877.1	15.1141	2.19702	0.00241189	Up	Myh9
XM_006236793.3	5.03913	2.19606	0.0011997	Up	Tet3
XM_006255824.1	3.34406	2.19508	0.00115986	Up	Itgb1
XM_008760546.2	3.16111	2.19398	0.000990894	Up	Casp7
NM_031664.1	9.26347	2.19379	0.0133592	Up	Slc28a2
XM_008772693.2	2.62191	2.19329	0.0140355	Up	Trim26
NM_144739.1	7.71851	2.19084	0.00151226	Up	Fmo5
NM_001108488.1	26.6115	2.18877	0.0351902	Up	Fes
XM_006229685.3	6.2337	2.18769	0.013588	Up	Picalm
NM_001011995.1	Inf	2.18766	0.00352021	Up	Tuba1c
XM_006231248.2	5.89256	2.1859	5.52e-06	Up	Cd274
XM_017590923.1	2.46949	2.18588	3.24e-05	Up	Cttnbp2nl
XM_006246855.2	4.01154	2.18581	0.0274756	Up	XAF1
XM_002728033.4	6.92899	2.18545	0.000494273	Up	Ackr1
NM_022277.1	10.3639	2.18407	0.00321243	Up	Casp8
XM_017593668.1	2.36513	2.18351	4.11e-05	Up	Laptm5
NM_001169103.1	17.8432	2.18329	0.00439405	Up	Crim1
NM_001011904.1	Inf	2.18151	0.0258693	Up	Rnf10
XM_017594811.1	2.32551	2.18141	0.00340562	Up	Rnf126
NM_001106047.2	54.0994	2.18085	0.0430867	Up	Loxl2
XM_017601556.1	2.07663	2.18044	0.032834	Up	Ddr1
NM_012678.2	14.0274	2.18009	0.0194224	Up	Tpm4
XM_006235295.3	5.2341	2.17997	0.000187862	Up	Mapre1
XM_224451.8	2.04279	2.17877	0.030131	Up	Pibf1
NM_053400.1	8.92142	2.17859	0.0213058	Up	Tle3
XM_008770771.2	2.70294	2.17588	0.00211172	Up	Fam167a
XM_008760934.1	3.14991	2.17545	0.0456363	Up	Spata5
NM_001008363.1	Inf	2.17345	6.21e-07	Up	Zfand2a
NM_001108248.1	28.6263	2.17307	0.0484285	Up	Was
NM_001014843.2	2694.81	2.17151	0.0188247	Up	Fcmr
NM_001271340.2	15.5588	2.16884	1.61e-05	Up	RGD1563365
XM_006232346.3	5.64619	2.16785	0.0168401	Up	Supt20h
XM_006239886.2	4.64348	2.16586	0.0295607	Up	Osr1
NM_017126.1	12.2583	2.16522	0.0438958	Up	Fdx1
XM_006256665.3	3.29144	2.16407	0.0353663	Up	Bcor
XM_006233669.3	5.46531	2.16404	0.000918879	Up	Egfl7
XM_006238671.3	4.84409	2.16313	0.0213281	Up	Mast2
XM_017601572.1	2.07421	2.16229	0.0386332	Up	Ly6g6c
XM_017598088.1	2.1945	2.16155	0.00829419	Up	LOC103690154
XM_017601829.1	2.06473	2.16116	0.00467072	Up	Bend3
XM_001054584.6	7.0571	2.16106	1.98e-05	Up	Glipr2
XM_008767283.2	2.84466	2.16003	0.00220321	Up	Kcne4
NM_019305.2	11.2272	2.1592	1.92e-05	Up	Fgf2
NM_022524.1	10.2367	2.15879	0.00740034	Up	Srpx
XM_008770165.1	2.72188	2.15854	0.000616356	Up	Atp8a1
NM_001012065.1	Inf	2.15596	0.0102497	Up	Adck4
XM_008769327.2	2.7664	2.154	0.00379142	Up	Oasl2
NM_001109364.1	23.1404	2.15353	0.000631945	Up	Sowahc
XM_006238512.2	4.84545	2.15196	0.0339002	Up	Pars2
XM_006245933.2	4.09294	2.15188	1.87e-05	Up	Rnps1
XM_008763977.2	3.00551	2.15102	0.000564472	Up	Mob3c
NM_001034944.1	122.521	2.15047	0.0192435	Up	Grap2
NM_001037214.1	118.213	2.14962	0.000249011	Up	Cdca4
XM_017597617.1	2.21165	2.14943	0.00540807	Up	Ubtd2
XM_006247119.3	3.9809	2.14823	0.00858895	Up	Rnft1
NM_053689.3	8.62092	2.14489	0.00161462	Up	Gtpbp4
NM_030854.1	9.7359	2.14395	0.045255	Up	Lect1
XM_006236295.3	5.11533	2.14332	4.28e-05	Up	Zc3hav1
NM_053287.1	9.07626	2.14255	0.00878356	Up	B4galt1
NM_144750.2	7.71814	2.14032	0.00565922	Up	Aspg
XM_006256703.3	3.28671	2.13817	0.034368	Up	Suv39h1
XM_006256083.1	3.32479	2.13724	0.00428296	Up	Bag6
NM_001012048.1	Inf	2.13334	0.0468672	Up	Sh2d4a
XM_017589927.1	2.51934	2.13328	0.0357001	Up	LOC103691005
XM_006255314.3	3.35591	2.13236	9.24e-05	Up	Ddx39a
XM_008770832.2	2.70028	2.13106	0.00814913	Up	Xpo7
NM_012532.2	14.7382	2.1286	3.83e-06	Up	Cp
XM_006249438.3	3.80676	2.1273	0.0468555	Up	Vsig10
XM_006238136.3	4.8937	2.12332	0.0122361	Up	Ccdc107
NM_001169102.1	17.8518	2.12321	0.00327732	Up	Tma16
XM_006233498.2	5.50737	2.12164	0.00191598	Up	Ifi44
NM_001170589.1	17.6042	2.12153	0.00144753	Up	Pus7
XM_006234798.2	5.27088	2.12141	0.000337125	Up	Mga
NM_130407.2	8.23059	2.12125	0.0462007	Up	Ugt1a7c
NM_001270983.1	15.8479	2.12058	0.0490645	Up	Ppp1cc
NM_001004418.2	Inf	2.1193	0.0302798	Up	Tacc2
XM_017595537.1	2.30041	2.11857	0.0242456	Up	Gramd1b
XM_577617.6	2.0032	2.1176	0.0290951	Up	Lvrn
XM_006252579.3	3.50177	2.11681	0.00591029	Up	Chdh
NM_021654.2	10.8009	2.11671	0.00844955	Up	Gja4
NM_001039344.2	101.438	2.11513	0.00272997	Up	Tes
NM_001276711.1	15.4324	2.11436	0.00552085	Up	Nfkb1
NM_001108487.2	26.761	2.11348	0.00210368	Up	Aen
NM_001037657.1	111.299	2.11183	1.11e-05	Up	Rbm12
NM_013058.2	12.9958	2.11114	0.000220103	Up	Id3
NM_001131001.1	20.1616	2.10903	0.0144078	Up	Fcer1g
NM_001025419.1	295.265	2.10722	0.00109359	Up	Tax1bp3
XM_006237916.2	4.93687	2.10526	0.000229695	Up	Nbn
XM_008769463.1	2.76298	2.10461	0.00996432	Up	R3hdm1
XM_017594703.1	2.33039	2.10288	0.0252997	Up	Mgat3
NM_001098216.1	75.4743	2.10155	0.00656841	Up	Tead3
XM_008758596.2	3.27458	2.09875	0.0188187	Up	Utrn
NM_001111098.1	21.7041	2.09794	0.0123012	Up	Lyn
XM_006253669.2	3.43577	2.09721	0.000488289	Up	Nfil3
NM_001013167.1	Inf	2.09691	0.0485848	Up	Wasf2
NM_001006974.2	Inf	2.09578	0.000315213	Up	Ccdc86
XM_006239749.3	4.65494	2.09517	0.0470227	Up	Alkbh8
XM_008773433.2	2.59446	2.09202	0.0047846	Up	Drp2
XM_006242639.2	4.40861	2.09001	0.0293795	Up	Fbxl12
XM_017595936.1	2.28378	2.08956	0.00105969	Up	Ctnnb1
XM_008772508.1	2.6368	2.08883	0.00277885	Up	Ist1
XM_006232890.3	5.58979	2.08853	0.0196658	Up	Tuft1
NM_001108831.2	24.8468	2.08761	0.0306004	Up	Kctd11
XM_017597250.1	2.22154	2.08712	0.0240655	Up	Thg1l
XM_017597471.1	2.21593	2.0842	0.000993976	Up	Med1
NM_001107264.1	35.1535	2.08403	0.0421898	Up	Nfatc4
XM_006249460.3	3.80509	2.08329	0.0109598	Up	Pxn
NM_012551.2	14.6505	2.08319	1.4e-05	Up	Egr1
XM_006238510.3	4.84732	2.08292	0.0118152	Up	Magoh
NM_001106637.1	44.9309	2.08217	8.14e-06	Up	Gem
XM_017601313.1	2.08267	2.07987	0.0110736	Up	Man2b1
NM_001107938.1	30.2212	2.07758	3.53e-05	Up	Polr1e
XM_017596087.1	2.27562	2.07532	0.00397346	Up	Fam63b
XM_006229010.3	6.32128	2.07211	0.0367869	Up	Med25
NM_001011922.1	Inf	2.0714	0.0199348	Up	Nedd9
NM_001006996.1	Inf	2.07097	0.0011245	Up	Ddx18
NM_001112737.2	21.5964	2.06872	0.0228096	Up	Limd1
XM_006255563.3	3.34947	2.06774	0.0416103	Up	Utp4
NM_031514.1	9.46351	2.06755	0.000154081	Up	Jak2
NM_001107883.2	30.7606	2.06739	0.00341019	Up	Il17ra
XM_006240930.1	4.5487	2.06651	0.0394666	Up	Plekhj1
NM_053439.1	8.90279	2.06479	0.0268637	Up	Ran
NM_001127303.1	21.4896	2.06302	0.0352458	Up	Itpripl2
XM_008759228.2	3.23724	2.06249	0.00514038	Up	LOC102547059
NM_031135.2	9.54425	2.06182	0.00128829	Up	Klf10
XM_017590617.1	2.48402	2.05976	0.0156174	Up	Camk2d
XM_017601766.1	2.06565	2.05921	0.0103935	Up	Ppt2
XM_006237529.2	4.95837	2.05818	0.0323237	Up	Hebp1
NM_001010968.2	Inf	2.0578	6.41e-05	Up	Eng
XM_008772264.2	2.65647	2.05748	3.23e-05	Up	Adgrg1
XM_006239982.2	4.63727	2.05322	0.00237587	Up	Bcap29
XM_017594809.1	2.32603	2.05154	0.0083035	Up	Wiz
XM_003749716.3	6.74599	2.05116	0.00132869	Up	Parp12
NM_001107315.1	34.2554	2.04797	0.000100232	Up	Pragmin
XM_006251555.1	3.60696	2.04608	0.00302463	Up	B3gnt2
XM_342028.7	2.02479	2.04604	0.000514727	Up	Ms4a6a
XM_006254895.3	3.37387	2.04526	0.00128066	Up	Rnmt
XM_006239034.2	4.77789	2.04426	0.0026557	Up	Pum1
NM_001134464.2	20.1444	2.04358	0.00644635	Up	Llph
NM_017133.1	12.199	2.04286	0.0178413	Up	Thbs4
XM_017596374.1	2.2565	2.04061	0.0145143	Up	Cul3
XM_006234992.3	5.25901	2.04059	7.01e-05	Up	Slc20a1
XM_006256387.3	3.29631	2.03476	0.000201164	Up	Lims1
NM_001024306.1	783.978	2.03256	0.000776301	Up	Gar1
XM_006249900.3	3.78412	2.0324	0.00022257	Up	Nav1
XM_003749354.4	6.79537	2.03028	0.00350301	Up	LOC100909441
XM_017597167.1	2.223	2.02964	0.000768526	Up	Actg1
XM_001071401.4	6.98818	2.0252	0.00253839	Up	Lsmem2
XM_008765728.2	2.89689	2.02407	0.0256421	Up	Plxnb2
NM_001100538.1	72.833	2.02224	0.000110179	Up	Pabpc4
XM_006241317.3	4.51727	2.02222	0.000251613	Up	Pawr
XM_006249247.3	3.82801	2.02129	0.00319926	Up	Asl
XM_006247502.3	3.95791	2.0212	0.00171946	Up	Fmnl1
XM_006229368.3	6.25946	2.02082	0.0214906	Up	Arrdc4
NM_001105770.1	61.5104	2.01848	0.00178334	Up	Zfp598
XM_006237018.3	5.00655	2.01784	0.00156675	Up	Setd5
XM_008760302.2	3.18862	2.01763	0.000115658	Up	Tjp2
XM_017600775.1	2.10883	2.01756	0.00537325	Up	LOC103690178
NM_032056.3	9.08975	2.0174	0.00919056	Up	Tap2
XM_006232514.3	5.6431	2.01504	4.49e-05	Up	Fam198b
NM_001305276.1	15.1996	2.0148	5.54e-05	Up	Helz2
XM_006233234.3	5.54253	2.01442	0.0021278	Up	Snx7
NM_001048075.1	85.1795	2.01338	0.0105168	Up	Clec2g
NM_001134712.1	19.6493	2.0114	0.000576334	Up	Fam60a
XM_006241710.2	4.48487	2.01135	0.00165009	Up	St3gal1
XM_017596096.1	2.27333	2.00795	0.00137977	Up	Mlip
NM_001107393.2	33.8671	1.99926	0.0199364	Up	Diaph1
XM_008759606.2	3.22225	1.99917	0.00107501	Up	Arnt2
XM_008763725.2	3.01724	1.99707	0.0152704	Up	Fsd1l
XM_008768977.1	2.78215	1.99646	0.00323894	Up	Zfp655
XM_003750141.4	6.70154	1.99367	2.41e-05	Up	Ccdc71l
NM_145789.2	7.66155	1.99298	0.000169673	Up	Il13ra1
XM_017589935.1	2.51875	1.99292	0.0232991	Up	Zfp446
NM_001109514.1	22.7095	1.99141	0.00561192	Up	Pmp2
XM_008759144.2	3.24304	1.99139	2.87e-05	Up	Spred3
XM_008767819.2	2.82283	1.98967	0.0259528	Up	Rai1
XM_008773045.2	2.59896	1.98906	0.000212357	Up	LOC299312
XM_006232641.3	5.61448	1.98879	0.0348766	Up	Sema4a
XM_003749439.4	6.77761	1.9878	0.0307477	Up	LOC100909750
XM_006233918.3	5.42381	1.9878	0.0307477	Up	Abl1
XM_006243969.3	4.31045	1.98547	0.0206411	Up	Cmtm6
NM_001100762.1	68.5794	1.98352	0.017195	Up	Havcr2
XM_017602276.1	2.05188	1.98149	0.00838818	Up	LOC685025
XM_008764706.2	2.96195	1.98136	7.51e-05	Up	Nin
NM_001012007.1	Inf	1.97844	0.00271297	Up	Irgm
NM_001044250.1	97.7263	1.97735	0.0175298	Up	Stat6
XM_008769002.1	2.77601	1.97643	0.000486447	Up	Smurf1
XM_017592646.1	2.39574	1.97602	0.0122532	Up	2018-03-08
NM_173116.1	7.50051	1.97551	0.000681537	Up	Sgpl1
XM_017595748.1	2.28607	1.97508	0.049171	Up	Sema3b
XM_008770899.2	2.69781	1.97371	0.0143933	Up	Elf1
NM_001009671.1	Inf	1.97303	3.23e-05	Up	Coq10b
NM_001039034.1	102.955	1.97085	0.000160477	Up	Wdr5
XM_006242246.3	4.44258	1.96867	0.01606	Up	Syce3
NM_001025422.1	294.322	1.96756	0.0077434	Up	Irak2
XM_006237372.2	4.9754	1.96553	0.0129192	Up	Iffo1
XM_006255965.3	3.33292	1.96424	0.0115626	Up	Hsd17b8
XM_017597892.1	2.20665	1.96295	0.0214644	Up	Ube2v2
XM_003749458.2	6.75519	1.96288	0.00225405	Up	LOC100912604
NM_012733.4	13.9038	1.96176	0.0484175	Up	Rbp1
XM_017590070.1	2.5117	1.95751	0.00189794	Up	Zfp536
NM_001034149.1	130.593	1.95671	3.09e-05	Up	Ddi2
XM_017591750.1	2.44306	1.95448	0.006527	Up	RGD1311739
NM_182674.3	7.28379	1.95229	0.00124657	Up	Bysl
NM_130421.2	8.21601	1.95198	0.0193223	Up	Lcp2
NM_178102.2	7.38679	1.95104	0.000675934	Up	Mapkapk2
XM_017600453.1	2.11858	1.95092	0.000120201	Up	Edn1
XM_017589045.1	2.55504	1.94985	0.0187509	Up	Pik3ap1
NM_001107652.1	32.6208	1.94749	0.000566888	Up	Snx18
NM_053349.1	8.99588	1.94642	0.00199061	Up	Sox11
XM_001070157.7	6.99869	1.94556	0.0227772	Up	Adgrd1
XM_006241543.3	4.49006	1.94554	0.000448121	Up	Pop1
NM_001191785.1	16.8886	1.94475	0.00381575	Up	Nop2
XM_008761193.1	3.13038	1.94453	0.00718251	Up	Clk2
XM_008770083.2	2.72848	1.94449	0.00914486	Up	Antxr2
XM_008767871.2	2.82047	1.94329	0.0420583	Up	Rasd1
NM_001105873.1	59.9329	1.9415	0.0106025	Up	Tm4sf19
XM_006237617.2	4.94912	1.94053	0.00156923	Up	Recql
XM_006254789.3	3.37726	1.93956	0.043965	Up	Pdgfrb
XM_006253555.2	3.4508	1.93765	0.00042751	Up	Hnrnpk
NM_001106835.1	42.7134	1.93605	0.00340929	Up	Bnip2
NM_138907.2	7.83394	1.93435	0.0364726	Up	Acot2
XM_006256988.3	3.28096	1.93341	0.00303725	Up	Gk
XM_006244558.3	4.25314	1.9306	0.00914754	Up	Srf
XM_006249420.3	3.81213	1.93028	0.0071385	Up	Med13l
XM_006246415.3	4.05922	1.92857	0.00401983	Up	LOC102555634
NM_022250.2	10.4543	1.92793	0.00747268	Up	Qtrt1
NM_053966.2	8.36203	1.92661	0.00412426	Up	Lamc1
XM_003750261.1	6.6859	1.92444	0.00662931	Up	LOC100911319
NM_001037793.2	104.003	1.92434	0.0211226	Up	Dock8
NM_001106697.1	44.1263	1.92398	0.00757027	Up	Mrto4
NM_001108718.1	25.6159	1.92394	0.0011329	Up	Alkbh1
XM_216388.8	2.04646	1.92065	5.9e-05	Up	Tmem245
NM_001107973.1	30.0595	1.92044	0.00297971	Up	Exo5
XM_017590638.1	2.48033	1.91989	9.81e-05	Up	Il6st
XM_017595602.1	2.29958	1.91977	0.00701686	Up	Fyco1
NM_001013109.1	Inf	1.91918	0.0196389	Up	Dapk2
XM_003749118.4	6.83831	1.91834	0.000394528	Up	Rrp12
XM_017593852.1	2.35915	1.91556	0.0183596	Up	Hspg2
NM_001014058.1	Inf	1.91549	0.00250763	Up	Usp18
XM_008772660.2	2.62265	1.9135	0.0180956	Up	Gse1
NM_001314068.1	14.9785	1.91304	0.0400527	Up	Mpz
XM_006230723.3	5.9938	1.91242	0.0188788	Up	Ppfia1
NM_017037.1	12.4953	1.91158	0.0404136	Up	Pmp22
XM_228076.9	2.03717	1.90974	0.00205929	Up	Rrp1b
XM_006256402.3	3.2962	1.90714	0.049281	Up	Ranbp2
NM_001012154.1	Inf	1.90577	0.0011971	Up	Tbrg4
XM_008770456.2	2.70953	1.90521	0.0193426	Up	Efemp1
NM_001305463.1	15.1349	1.90284	0.000146029	Up	Rcor1
NM_001033967.2	145.438	1.90075	0.0441019	Up	Ak2
XM_006248268.3	3.89538	1.89508	0.000292529	Up	Cd47
NM_001106521.2	45.8024	1.89351	0.0231333	Up	Nxt1
XM_006243659.3	4.3323	1.88866	0.00228716	Up	Cdv3
XM_017591342.1	2.46155	1.8869	0.0309358	Up	Alpk1
XM_006234447.2	5.35803	1.88451	0.0141022	Up	Serping1
XM_006242140.3	4.4506	1.88211	0.0325243	Up	Nfam1
XM_006247982.3	3.92592	1.87905	0.0213203	Up	Vgll3
NM_001169116.2	17.7888	1.87839	0.00222767	Up	Elmsan1
XM_006234523.2	5.31647	1.87687	0.00116756	Up	Celf1
XM_006238930.3	4.80122	1.87547	0.000399735	Up	Phc2
XM_006245420.2	4.15031	1.87511	0.000473479	Up	Atg16l1
XM_006248107.3	3.91106	1.87508	0.000289974	Up	Ifnar2
XM_017589733.1	2.52769	1.87236	0.0105206	Up	Lrfn4
NM_001025021.1	399.676	1.8711	0.00110178	Up	Dnajc25
XM_575365.6	2.0082	1.87042	2.18e-05	Up	RGD1563091
XM_008763695.1	3.01871	1.86956	0.0287729	Up	Anp32b
XM_017600416.1	2.11915	1.86928	0.00731054	Up	Psd3
XM_006246755.3	4.03744	1.86884	0.0462197	Up	Nlrp1a
NM_080767.2	8.2529	1.86853	0.000378494	Up	Psmb8
NM_053595.2	8.74377	1.86806	0.000168656	Up	Pgf
NM_183330.1	7.22645	1.86574	0.0093293	Up	Ctsz
XM_006250960.2	3.65351	1.86534	0.042963	Up	Tlr6
NM_001106430.1	47.6298	1.86445	0.015651	Up	Mgst2
XM_006249382.3	3.82206	1.86377	0.0145188	Up	Oas1a
XM_017592479.1	2.40936	1.86358	0.00167959	Up	Gata2
XM_006251568.1	3.60608	1.86296	0.0417996	Up	Ehbp1
NM_001106427.1	47.7334	1.86139	0.000420403	Up	Spry1
NM_053883.2	8.4079	1.8604	5.05e-05	Up	Dusp6
XM_006251859.3	3.57551	1.85919	0.0302802	Up	Hnrnpc
XM_017592156.1	2.42446	1.85502	0.00554716	Up	Cobll1
XM_006243518.3	4.3512	1.85304	0.000397895	Up	Syncrip
XM_006243702.3	4.3224	1.85303	0.0209508	Up	Cdc25a
NM_013046.3	12.9988	1.85244	0.0128843	Up	Trh
XM_008768578.1	2.79703	1.85166	0.045095	Up	C2cd2
XM_006248700.3	3.85416	1.85109	0.011726	Up	Klhl22
NM_001108285.1	28.0133	1.85078	0.0165641	Up	Nxn
XM_017594799.1	2.32642	1.85043	0.00377808	Up	Zfp563
NM_001309381.1	15.0526	1.84863	2.7e-05	Up	Flt1
NM_001109651.1	22.2453	1.84694	0.00327264	Up	LOC691931
XM_006232268.3	5.65814	1.84524	0.047279	Up	Anxa5
XM_017591068.1	2.46744	1.84512	0.0360128	Up	Ddah1
NM_001008721.1	Inf	1.84509	0.0277809	Up	Ebna1bp2
NM_001108423.1	26.9208	1.8443	0.0130544	Up	Riok3
XM_006240621.3	4.57505	1.8442	0.00947181	Up	Klc1
NM_001271275.1	15.5972	1.84417	0.00198659	Up	Zswim8
NM_001173427.1	17.5393	1.84079	0.00383177	Up	Dram1
NM_001014044.1	Inf	1.83963	0.020936	Up	Tifa
XM_006250848.1	3.67278	1.83815	5.16e-05	Up	Rest
NM_021584.2	10.8496	1.83394	1.73e-05	Up	Dclk1
NM_021576.2	10.9074	1.83382	5.21e-05	Up	Nt5e
NM_001012005.2	Inf	1.83181	0.00430043	Up	Nid2
XM_006232084.3	5.70667	1.83098	0.0039924	Up	LOC103689968
NM_031614.2	9.32176	1.83052	2.02e-05	Up	Txnrd1
XM_006238903.3	4.80422	1.83031	0.000266502	Up	Map7d1
NM_001145842.1	18.5272	1.82892	0.0183893	Up	Grn
XM_017595672.1	2.29566	1.82395	0.00113055	Up	Plscr2
NM_139194.2	7.74624	1.82166	0.0111845	Up	Fas
XM_017601549.1	2.07749	1.82005	0.0128187	Up	Fyn
XM_006232936.2	5.58512	1.81943	0.0199617	Up	Gabpb2
XM_006234573.3	5.3036	1.81814	0.00330644	Up	Tspan18
NM_001039587.1	100.922	1.81621	0.0142138	Up	Wdr45b
NM_172019.2	7.55411	1.81451	0.00298147	Up	Ifi47
XM_006248505.3	3.86622	1.81399	0.0207888	Up	Lpp
XM_008765536.2	2.9037	1.8129	0.0323213	Up	Phf20l1
XM_008764820.2	2.9592	1.81008	0.0127175	Up	Btbd7
NM_134351.1	7.99291	1.80773	2.63e-05	Up	Mat2a
XM_017599161.1	2.1575	1.8071	0.0204738	Up	Lrrc8b
XM_006238891.3	4.80939	1.80266	0.0382315	Up	Eva1b
XM_006242492.3	4.43283	1.80202	0.0169005	Up	Yap1
NM_198134.2	7.20755	1.80165	0.0065919	Up	Bst2
NM_001105841.1	60.2318	1.80129	0.0225051	Up	Ptrf
XM_008760439.2	3.17045	1.80087	0.0346639	Up	Sh3pxd2a
XM_006242092.3	4.46463	1.80063	0.0418048	Up	Scube1
XM_006241285.1	4.52543	1.79963	7.2e-05	Up	Dcn
XM_017591118.1	2.46567	1.7985	0.0415261	Up	Mtmr11
XM_006246345.3	4.06862	1.79743	0.0338161	Up	LOC103689931
NM_001015022.3	1641.74	1.79644	0.000283223	Up	Tbc1d10a
NM_031797.2	9.17499	1.79553	0.0273733	Up	Cd82
NM_001313843.1	14.9823	1.79542	0.0077049	Up	Mrpl17
XM_006241312.2	4.52528	1.79479	0.000172621	Up	Ppp1r12a
NM_001108295.1	27.861	1.79052	0.00576981	Up	Cwc25
XM_017593921.1	2.35803	1.78799	0.0215439	Up	Adamtsl1
XM_006233277.3	5.52775	1.78693	0.0139027	Up	Sec24b
XM_003750307.4	6.68131	1.78589	0.00104147	Up	LOC100910056
XM_008763674.2	3.0227	1.7852	0.020867	Up	Tln1
XM_006238695.3	4.83256	1.78063	0.025728	Up	Mknk1
NM_022509.1	10.289	1.77888	0.00420316	Up	Smn1
NM_001011980.1	Inf	1.77795	0.000962171	Up	Ppan
XM_006243024.3	4.38664	1.77668	0.00193385	Up	LOC100151767
NM_001109602.1	22.3833	1.77634	0.0314045	Up	Alyref
NM_031818.1	9.17273	1.77499	0.000117954	Up	Clic4
XM_008770388.2	2.7121	1.77494	0.00728534	Up	Prr14l
NM_022500.4	10.289	1.7741	0.0179701	Up	Ftl1
XM_002729553.5	6.90395	1.77316	0.0464337	Up	LOC100360087
XM_006240197.3	4.61756	1.7722	3.94e-05	Up	Hif1a
XM_006255116.3	3.36571	1.77197	0.0187464	Up	Ccdc102a
NM_053561.2	8.77691	1.77163	9.19e-05	Up	Nap1l1
NM_001010945.1	Inf	1.77159	9.31e-05	Up	Tmem120a
XM_017601859.1	2.06463	1.77144	0.0403236	Up	LOC108348139
XM_006248236.3	3.90393	1.77059	0.025264	Up	Tfg
XM_008770981.2	2.68802	1.76937	0.00798703	Up	Slmap
NM_053715.2	8.57174	1.76931	0.000335256	Up	Slc5a3
NM_012875.2	13.3313	1.76914	0.0356892	Up	Rpl39
XM_006231905.3	5.79726	1.76899	0.00115445	Up	Dimt1
NM_001108516.1	26.3383	1.76888	0.00606417	Up	Dpf2
NM_001100501.1	74.85	1.76811	0.00139636	Up	Usp16
XM_017589612.1	2.53742	1.76668	0.0144475	Up	Zfp260
NM_001037179.1	121.007	1.76356	0.00701889	Up	Lrrc8c
NM_001039020.1	103.426	1.76281	0.00013503	Up	Zfp207
NM_001105928.1	58.0423	1.76256	0.000136159	Up	Vps37b
XM_006231246.3	5.90509	1.7603	0.00125891	Up	Pum3
XM_006254381.3	3.40608	1.75985	0.00729947	Up	Mtmr1
XM_006236050.2	5.15622	1.75806	0.00718038	Up	Ankib1
NM_001079700.1	77.7767	1.75777	0.0429172	Up	Cdc42ep1
NM_019290.1	11.238	1.75596	0.000710835	Up	Btg3
XM_008763795.2	3.00871	1.75578	0.0353379	Up	Hacd4
XM_006238561.2	4.8452	1.75441	0.0199176	Up	Glis1
XM_006232301.3	5.64861	1.75235	0.0239493	Up	Jade1
XM_003749698.3	6.75482	1.75116	0.0059108	Up	LOC100912034
XM_017595447.1	2.30129	1.75021	0.00238344	Up	Phldb1
NM_001105879.1	59.7303	1.74982	0.00101559	Up	Arhgap31
XM_006241459.3	4.50038	1.74926	0.00522946	Up	Nab2
XM_006242425.3	4.43971	1.74758	0.0146712	Up	Pcbp2
XM_008761797.2	3.09957	1.74526	0.00964918	Up	Gapvd1
XM_017599013.1	2.16465	1.74495	0.0462823	Up	LOC100911428
XM_006251376.3	3.63358	1.74458	0.0378321	Up	Whsc1
NM_183056.2	7.23979	1.74416	7.9e-05	Up	Stk40
NM_001100771.1	68.2873	1.74302	0.011206	Up	Esf1
XM_017597531.1	2.21366	1.74222	0.0091227	Up	Ccdc137
XM_003751133.2	6.60329	1.74183	0.0139477	Up	Brat1
XM_006230278.3	6.04356	1.74157	0.0196353	Up	Fbxl19
NM_199372.2	7.12312	1.74087	0.000274824	Up	Eif4a1
XM_017595137.1	2.3104	1.73865	0.000738759	Up	Socs2
XM_008765295.2	2.92064	1.7371	0.0105549	Up	LOC103692813
XM_017598829.1	2.17254	1.73679	0.000129758	Up	Atf6
NM_001108933.1	24.4115	1.73457	0.00132773	Up	Dse
XM_017592670.1	2.39015	1.73326	0.045577	Up	Ppfibp1
NM_001108901.1	24.6332	1.73263	0.0408193	Up	Samd5
NM_001102408.1	65.6458	1.73156	0.00190214	Up	Uck2
XM_017599461.1	2.14794	1.72864	0.0133229	Up	N4bp2
NM_001012014.1	Inf	1.72599	0.00138724	Up	Ftsj3
XM_017596126.1	2.27077	1.72573	0.0366673	Up	LOC102552166
NM_013059.1	12.9667	1.72565	0.0303181	Up	Alpl
NM_001191624.1	17.1769	1.72441	0.0304053	Up	Lrrk1
XM_006238965.3	4.7875	1.72316	0.04055	Up	RGD1561149
XM_008772815.2	2.61367	1.7218	0.00108807	Up	Anks1a
NM_198767.1	7.17864	1.72173	0.0155561	Up	Pde8a
NM_001008847.2	Inf	1.72123	0.000558977	Up	RT1-Da
XM_017602005.1	2.06308	1.71963	0.0464026	Up	Ap1s2
NM_001037208.1	118.508	1.71943	0.000336136	Up	Creld2
XM_006253730.3	3.42636	1.71942	0.00449494	Up	Card19
NM_001105793.1	61.1801	1.71941	0.0197548	Up	Aloxe3
XM_006232103.3	5.69844	1.71872	0.0382534	Up	Rsl1
XM_219845.9	2.04625	1.71829	0.00260863	Up	Prrg3
NM_001011944.1	Inf	1.71664	0.0352258	Up	Slc37a1
NM_175580.2	7.44287	1.71639	0.000716673	Up	Gnl3
NM_001108475.2	26.777	1.71527	0.00392085	Up	Vasp
NM_053736.2	8.56163	1.71412	0.0007555	Up	Casp4
XM_006227893.2	6.48071	1.71352	0.0391103	Up	Wtap
NM_017259.1	11.7904	1.7132	0.00651911	Up	Btg2
XM_008768120.2	2.8031	1.7132	0.0456044	Up	Rps6kb1
XM_008764388.2	2.97473	1.71236	0.00205441	Up	Dvl1
XM_017601730.1	2.06616	1.71233	0.00768191	Up	RT1-CE3
XM_017602145.1	2.05816	1.71194	0.0129403	Up	Ctps2
XM_008769656.2	2.75293	1.71131	0.0024021	Up	Smg7
NM_001107453.1	33.4716	1.70898	0.0486828	Up	Brd9
XM_006254438.3	3.40551	1.70818	0.02396	Up	Ss18
NM_001105736.2	62.9816	1.70724	0.0109131	Up	Chic2
NM_001109882.1	22.1858	1.70718	0.00826381	Up	Bsg
NM_001014113.2	Inf	1.70696	0.00124568	Up	Utp14a
XM_006245083.3	4.18872	1.70381	0.0370158	Up	Mettl21a
XM_003750817.3	6.63925	1.70333	0.0156246	Up	Hnrnpab
XM_008763362.2	3.03089	1.70327	0.006565	Up	Plekha5
XM_008763381.2	3.02782	1.70273	0.0245401	Up	Rassf8
XM_006231208.3	5.90549	1.70252	0.000237566	Up	Rcl1
XM_006239223.3	4.73542	1.69951	0.00127065	Up	Srsf10
NM_053321.2	9.02105	1.69761	0.0127479	Up	Ptafr
XM_215206.10	2.047	1.69735	0.0251607	Up	Ccdc88b
NM_199267.2	7.1239	1.69639	0.000909441	Up	Rela
NM_001168653.1	17.8872	1.69578	0.00386269	Up	Pwp2
XM_006255620.3	3.34848	1.69476	0.00311568	Up	Sf3b3
NM_001106876.1	42.2375	1.69354	0.000895661	Up	Mllt1
NM_024151.1	9.93884	1.69286	0.0129609	Up	Arf4
NM_001105966.1	57.2534	1.69229	0.0255808	Up	Creg1
NM_001024781.1	542.989	1.69017	0.0408229	Up	Sox18
XM_225927.8	2.03881	1.68842	0.00845912	Up	Malt1
NM_013069.2	12.9253	1.68833	0.0002763	Up	Cd74
NM_021587.1	10.8437	1.68807	0.00548125	Up	Ltbp1
NM_001109133.1	23.564	1.68803	0.00676194	Up	Spata2L
NM_001164142.3	18.3068	1.68623	0.0220862	Up	Cnr2
NM_001191548.1	17.4869	1.68605	0.00553329	Up	Ddx54
NM_001109584.1	22.4798	1.68598	0.00675465	Up	Vangl1
XM_008759140.2	3.24363	1.68574	0.0432917	Up	Sptbn4
NM_001277178.1	15.4286	1.68565	0.0272837	Up	Kdm5a
XM_006228175.3	6.41865	1.68445	0.00270534	Up	LOC102546678
XM_017597573.1	2.21258	1.68424	0.0347644	Up	Clec16a
NM_001127534.1	21.0009	1.6836	0.00349859	Up	Nle1
XM_017592822.1	2.38699	1.68316	0.00027345	Up	Aak1
XM_006235069.2	5.25527	1.68241	0.0328971	Up	Slc23a2
NM_001013938.1	Inf	1.68062	0.000910077	Up	Vwa1
NM_001130536.1	20.2724	1.67982	0.00915376	Up	Fzd6
XM_008769858.1	2.74118	1.67857	0.01445	Up	Ahctf1
NM_001106075.1	52.5126	1.6749	0.0475553	Up	Klhl26
XM_008761297.2	3.12466	1.67117	0.0104237	Up	Pogz
NM_017062.2	12.4325	1.6693	0.000184838	Up	Pdlim4
NM_031628.1	9.31567	1.66897	0.0113662	Up	Nr4a3
XM_017595101.1	2.31231	1.6673	0.0188725	Up	Scamp4
NM_001309453.1	15.0098	1.66652	0.00357004	Up	Sec24d
XM_008767165.2	2.85284	1.66651	0.0139383	Up	Ccnyl1
XM_006249137.3	3.83243	1.66469	0.0278674	Up	Vgf
NM_030989.3	9.68216	1.66443	0.0011382	Up	Tp53
XM_006242943.3	4.387	1.66322	0.0171991	Up	Sidt2
XM_006241905.3	4.47878	1.66258	0.0227025	Up	Zfp623
XM_006240139.3	4.62346	1.66217	0.010502	Up	Fam179b
XM_006243256.3	4.35838	1.66085	0.00325262	Up	Dpp8
XM_003750329.4	6.67831	1.66043	0.00231482	Up	Mettl1
NM_001276477.1	15.4545	1.65943	0.0221282	Up	Rps27l
XM_008769658.2	2.75111	1.6594	0.00979734	Up	Suco
NM_001106040.1	55.0711	1.65813	0.000797471	Up	Nop9
XM_017595702.1	2.29416	1.65799	0.0364261	Up	Trak1
XM_017593455.1	2.3696	1.65758	0.0457774	Up	Ptprf
NM_024403.2	9.78586	1.65755	0.000105366	Up	Atf4
NM_001108707.1	25.6529	1.65708	0.00127598	Up	Twistnb
XM_017596176.1	2.26904	1.65693	0.000501801	Up	Amotl1
NM_001106762.1	43.1323	1.65682	0.00542605	Up	Syne3
NM_001007707.1	Inf	1.65583	0.000760702	Up	Hgh1
XM_006230642.3	6.00064	1.65329	0.000906653	Up	Sf1
NM_013083.2	12.9128	1.64913	8.97e-05	Up	Hspa5
XM_006233911.3	5.42798	1.64832	0.0300481	Up	Ass1
NM_001108822.1	24.9017	1.64716	0.00219693	Up	RGD1305537
XM_008767891.2	2.81699	1.64654	0.00101888	Up	Lrrc75a
XM_006251339.3	3.63577	1.64634	0.0240441	Up	Thoc5
NM_001009720.2	Inf	1.6437	0.00014981	Up	Srsf2
NM_001106095.1	51.9975	1.64136	0.00948352	Up	Lig4
NM_019191.2	11.4244	1.63886	0.0025495	Up	Smad2
NM_012598.2	14.3714	1.63872	0.00112547	Up	Lpl
XM_003750935.4	6.61715	1.63718	0.00128146	Up	Rundc1
XM_017601314.1	2.08186	1.63574	0.0240418	Up	Dnajb1
NM_031524.1	9.40722	1.63573	0.00335016	Up	Pdgfb
NM_001013184.1	Inf	1.63569	0.00359662	Up	Hmgn1
NM_001005883.1	Inf	1.6332	0.00125815	Up	Pi4k2b
XM_017599334.1	2.15432	1.63269	0.00447522	Up	Sertad2
XM_017596247.1	2.26792	1.63238	0.0175117	Up	Epb41l3
XM_008770679.1	2.7032	1.63207	0.00138603	Up	Irf9
XM_006234396.3	5.36965	1.63106	0.000299901	Up	Nfe2l2
XM_006241227.3	4.52711	1.63075	0.000452059	Up	Utp20
XM_008764147.1	2.9982	1.63063	0.00388336	Up	Rnf19b
XM_006246575.3	4.04589	1.62967	0.0114706	Up	Ndel1
XM_006232707.2	5.60158	1.62933	0.000761703	Up	Slc39a1
NM_173314.2	7.44674	1.6291	0.0182156	Up	Zfp455
NM_199099.2	7.14802	1.62887	0.00407503	Up	Impdh2
XM_017594796.1	2.32893	1.62821	0.0175546	Up	Arl13b
NM_001039035.2	102.141	1.62817	0.000547844	Up	Srsf7
NM_139324.1	7.72867	1.62779	0.000387625	Up	Ehd4
XM_017590057.1	2.51305	1.62637	0.018182	Up	LOC108348106
NM_017172.1	12.09	1.62589	0.000295574	Up	Zfp36l1
XM_006245750.3	4.1142	1.62242	0.034383	Up	Carhsp1
NM_024159.1	9.90496	1.62204	0.000405915	Up	Dab2
NM_053699.1	8.6012	1.62	0.0339317	Up	Cited4
XM_006248835.3	3.84891	1.61993	0.00144536	Up	Lnx2
XM_006229164.3	6.29929	1.61913	0.00360982	Up	Nucb1
XM_008760400.2	3.17445	1.61861	0.013117	Up	Bloc1s2
XM_003750763.4	6.64048	1.61764	0.00564697	Up	LOC100911685
XM_006230355.3	6.03358	1.61577	0.0420655	Up	Sh2b1
NM_013141.2	12.7821	1.6155	0.000477133	Up	Ppard
XM_002727709.4	6.94705	1.61535	0.000325324	Up	LOC100362027
NM_001127659.1	20.8077	1.6152	0.00138189	Up	Mars
XM_017591799.1	2.4413	1.61362	0.00283729	Up	Nfatc2
NM_031773.1	9.2139	1.61336	0.00659481	Up	Polr1b
NM_001191609.1	17.183	1.61125	0.0079108	Up	Lama5
NM_053812.1	8.53547	1.60881	0.00156755	Up	Bak1
XM_002727774.2	6.94111	1.60872	0.00097425	Up	Tsr1
NM_053394.2	8.94272	1.60646	0.00260076	Up	Klf5
XM_017596429.1	2.25088	1.60644	0.0327134	Up	Tjap1
XM_008768096.1	2.80819	1.60533	0.0475238	Up	Fam222b
XM_006252908.3	3.47543	1.60484	0.000520492	Up	Nr2c2ap
XM_017599796.1	2.14081	1.60381	0.0445172	Up	Ctsb
XM_006246802.2	4.03172	1.60379	0.000194896	Up	Mybbp1a
NM_031981.2	9.11129	1.60288	0.00456669	Up	Nsfl1c
XM_017593810.1	2.36099	1.60117	0.00296949	Up	LOC108348080
XM_006227873.3	6.49806	1.60029	0.00739308	Up	Map3k4
XM_001074653.5	6.95866	1.59982	0.000514137	Up	Ttll4
NM_001107705.1	32.0678	1.59974	0.00551734	Up	Wdr3
NM_001135708.1	19.0264	1.59903	0.000902522	Up	Urb2
XM_006255482.3	3.35	1.59724	0.0195528	Up	Slc12a4
XM_017595388.1	2.30203	1.59642	0.0177583	Up	LOC100910885
XM_017588937.1	2.55879	1.59535	0.0121982	Up	Zfp592
XM_006246400.2	4.06209	1.59393	0.0162116	Up	Gemin5
NM_001079699.1	78.818	1.59305	0.0005738	Up	Rrs1
NM_017361.1	11.6541	1.5909	0.000926044	Up	Nup54
NM_001106150.1	51.458	1.59049	0.000663408	Up	Spry4
XM_008771543.2	2.67776	1.58955	0.0201972	Up	Fgd3
NM_001107454.1	33.4636	1.58917	0.00197508	Up	Nkd2
NM_001108146.1	28.8592	1.58914	0.00227588	Up	Zc3h12c
XM_006231922.2	5.79556	1.58761	0.0134253	Up	Gpbp1
XM_006246935.3	3.99796	1.58703	0.0324606	Up	Ift20
XM_017597823.1	2.20973	1.58645	0.00182469	Up	Rnf213
NM_138526.1	7.9391	1.58625	0.000323821	Up	Noct
NM_001107069.1	36.7675	1.58538	0.00171731	Up	Usp36
NM_001107465.1	33.4399	1.5843	0.00542353	Up	Chd1
XM_017590241.1	2.50999	1.58424	0.0202708	Up	Adam12
XM_017593329.1	2.37618	1.5841	0.0153658	Up	Tgs1
NM_001106340.1	49.3719	1.58137	0.0018165	Up	Mphosph10
XM_006231109.3	5.95149	1.58012	0.0172018	Up	LOC100912573
NM_001270802.1	16.1903	1.57869	0.00309595	Up	Kpna2
XM_006247957.2	3.92733	1.57848	0.0499831	Up	LOC102550455
NM_001106204.1	50.7343	1.57265	0.00107318	Up	Rnf217
NM_199083.2	7.15354	1.57082	0.000740278	Up	Pno1
NM_022615.1	10.2068	1.57044	0.000428519	Up	Top1
XM_006239276.3	4.73432	1.57019	0.0103395	Up	Ece1
NM_001105720.2	63.4194	1.56759	0.000308201	Up	Nfkbia
XM_006232675.3	5.6072	1.56655	0.0175141	Up	Kirrel
NM_001106943.1	38.7823	1.56526	0.0274445	Up	Foxo4
NM_181375.1	7.38396	1.56497	0.00684853	Up	Robo4
NM_001029915.1	187.554	1.56474	0.000868496	Up	Brix1
XM_006230784.3	5.9818	1.56058	0.00508786	Up	Tpcn2
NM_130812.3	8.17479	1.56039	0.0182088	Up	Cdkn2b
XM_017597321.1	2.22133	1.55424	0.0117603	Up	Nbr1
NM_001007741.1	Inf	1.55418	0.00406347	Up	Isg20l2
XM_006230747.3	5.9891	1.55268	0.0292581	Up	Mus81
XM_017596110.1	2.27088	1.55251	0.00424539	Up	LOC100910069
[truncated: 651 more rows]

## Sheet: downregulated DEGs in GSE138966
id	foldChange	log2FoldChange	pval	up_down	gene
NM_001012112.1	0.00487105	-7.68155	0.00377641	Down	Ankrd9
XM_017600715.1	0.00549243	-7.50834	1.06e-13	Down	LOC102553010
NM_012705.1	0.00677347	-7.20589	0.0251597	Down	Cd4
XM_017599444.1	0.00710476	-7.137	0.000145736	Down	Aasdh
NM_001271135.1	0.00790176	-6.98361	0.00215131	Down	Ulk3
XM_017592918.1	0.00820207	-6.9298	0.000487074	Down	Crot
XM_017602365.1	0.00874668	-6.83705	0.000795313	Down	Zcchc16
XM_008760819.2	0.00970161	-6.68756	0.000603272	Down	Cdh18
XM_017594898.1	0.0100838	-6.63182	0.00940104	Down	Slc4a8
XM_017596528.1	0.0116317	-6.4258	0.00134043	Down	Speg
XM_017591071.1	0.0117463	-6.41165	0.00231309	Down	Pde4dip
XM_017601425.1	0.0124145	-6.33183	0.00329123	Down	RGD1306072
XM_017602402.1	0.0126712	-6.3023	0.00817611	Down	Arhgap36
XM_017593174.1	0.0126783	-6.30149	0.000836341	Down	St18
NM_001108762.1	0.0131541	-6.24835	0.0178565	Down	Commd4
XM_017601648.1	0.0148889	-6.06962	0.00015546	Down	Cpne5
NM_001108774.1	0.0149958	-6.05929	0.0258697	Down	Mrap2
XM_008767236.2	0.0150494	-6.05415	0.00273207	Down	Smarcal1
XM_017600045.1	0.0151208	-6.04732	0.0026938	Down	Tmem255b
XM_006248539.3	0.0154125	-6.01976	0.0136513	Down	Dgkg
XM_008771301.2	0.0160038	-5.96544	4.9e-05	Down	RGD1304810
NM_138893.1	0.0161148	-5.95547	5.4e-05	Down	Myo16
XM_017596058.1	0.0162252	-5.94562	0.00427924	Down	Megf11
XM_008762479.2	0.0168528	-5.89087	0.0295047	Down	Zmynd8
XM_008760338.2	0.0170008	-5.87825	0.000831341	Down	Smarca2
XM_008763171.2	0.01752	-5.83485	0.00174336	Down	Itpr1
NM_001008893.1	0.0182351	-5.77714	0.0391888	Down	Ldhd
XM_006250947.3	0.0182699	-5.77439	0.00815296	Down	Nsun7
XM_006251073.3	0.0182826	-5.77338	0.0401737	Down	C1qtnf7
XM_017599311.1	0.0187125	-5.73985	0.0257438	Down	Ablim2
XM_017591701.1	0.0188123	-5.73218	0.0017649	Down	Zfp385b
XM_017590075.1	0.019382	-5.68914	3.26e-07	Down	LOC102548231
NM_001109117.1	0.0195392	-5.67748	0.00353407	Down	Rnf182
NM_001010965.1	0.0195692	-5.67527	0.0314166	Down	Mok
XM_006252678.3	0.0196505	-5.66929	0.0297696	Down	Duxbl1
XM_017595890.1	0.0200353	-5.64131	0.0341037	Down	Csnk1g1
NM_001127594.1	0.0208043	-5.58697	0.000396687	Down	Zfp786
XM_008772444.2	0.0213391	-5.55036	0.011622	Down	LOC102557368
XM_008769306.2	0.021464	-5.54194	0.0438578	Down	P2rx2
XM_006238693.3	0.0218831	-5.51404	0.0468551	Down	RGD1305347
XM_006235121.2	0.022055	-5.50275	0.00481289	Down	Mgme1
XM_006256226.3	0.0223659	-5.48255	0.000980978	Down	Rnf8
XM_008766722.2	0.0228873	-5.44931	0.0233769	Down	Tcaim
NM_001304734.1	0.0229746	-5.44382	0.0232128	Down	Oprm1
XM_017599351.1	0.0244758	-5.3525	0.00586836	Down	Prom1
XM_017590776.1	0.0260402	-5.26312	0.00108744	Down	Ntng1
XM_017592462.1	0.0262294	-5.25267	0.0299205	Down	Plekha5
XM_006253133.3	0.0268508	-5.21889	0.00973042	Down	Ing2
XM_003749315.4	0.0268514	-5.21886	5.8e-12	Down	LOC100910284
NM_001014099.1	0.0274428	-5.18743	0.0465439	Down	Paqr8
XM_006248053.3	0.0276929	-5.17434	9.83e-06	Down	Grik1
XM_006242625.3	0.0277839	-5.16961	0.000968359	Down	Tmem205
NM_199269.1	0.0278802	-5.16461	0.0164807	Down	Mdga2
NM_001009967.2	0.0288773	-5.11392	0.00278861	Down	Pip5k1c
XM_008762909.1	0.0295487	-5.08076	0.0226055	Down	Creb5
XM_221965.8	0.0301194	-5.05316	0.00977862	Down	Iqce
XM_017596020.1	0.0310015	-5.01152	0.0107826	Down	LOC102546809
XM_008768142.2	0.0312136	-5.00168	5.04e-05	Down	LOC103693393
XM_017589782.1	0.0316678	-4.98084	0.000900221	Down	Kcnj11
XM_017600483.1	0.0327095	-4.93415	0.000250946	Down	Gpld1
XM_017589244.1	0.032773	-4.93135	0.0432301	Down	Ppp6r3
XM_017592895.1	0.034421	-4.86057	0.0304166	Down	Fam19a4
XM_006252443.3	0.0346796	-4.84977	1.74e-07	Down	Slitrk6
XM_006248951.3	0.0347145	-4.84832	0.0322794	Down	Sun1
XM_017596471.1	0.0348535	-4.84255	0.0195035	Down	Mdh1b
XM_008765454.2	0.0360755	-4.79284	0.00868729	Down	Rspo2
XM_017601905.1	0.0360827	-4.79255	0.0135558	Down	Glra2
XM_017601354.1	0.0362303	-4.78666	0.0182349	Down	Clgn
XM_006241735.3	0.0362363	-4.78642	0.0139953	Down	Gpr20
NM_080786.1	0.0373467	-4.74288	0.0098454	Down	Slco2b1
XM_017591119.1	0.037394	-4.74105	0.00707771	Down	Sertm1
XM_008770346.2	0.0389116	-4.68366	0.0481415	Down	Hus1
XM_008762961.2	0.0389458	-4.68239	1.06e-08	Down	Abcg2
XM_017596407.1	0.0391533	-4.67472	0.0133961	Down	Lrfn2
XM_017593041.1	0.0405538	-4.62402	0.0244734	Down	Parp11
XM_006241591.3	0.0437143	-4.51575	0.0215028	Down	Rims2
XM_008767307.2	0.0441816	-4.50041	0.00659909	Down	Usp37
XM_017594652.1	0.0442795	-4.49722	3.67e-07	Down	Gls2
XM_008761179.2	0.0447036	-4.48347	0.0185031	Down	Rrnad1
XM_017596233.1	0.0448079	-4.4801	0.000943646	Down	Epb41l3
XM_006234180.3	0.0452777	-4.46506	0.00364986	Down	Neb
XM_006230047.3	0.046465	-4.42771	0.0296828	Down	Mrvi1
XM_006251004.3	0.0469797	-4.41182	4.1e-06	Down	Tbc1d1
XM_008760646.2	0.0477106	-4.38955	4.28e-11	Down	Ssbp2
XM_017600017.1	0.048048	-4.37938	1.3e-13	Down	Slmap
XM_017598795.1	0.0485231	-4.36518	0.0226777	Down	Ppp1r12b
XM_006244991.3	0.0497492	-4.32918	0.000259537	Down	Spats2l
XM_017593064.1	0.0501288	-4.31822	0.0134192	Down	Lmo3
XM_008760898.2	0.0521387	-4.2615	0.0285464	Down	Tmem212
XM_006238887.3	0.0531042	-4.23503	0.00965989	Down	Meaf6
XM_006248833.3	0.0532474	-4.23115	0.00142961	Down	Slc46a3
XM_008762257.2	0.053747	-4.21767	0.00061215	Down	Slx4ip
NM_001004260.1	0.0546616	-4.19333	0.0296958	Down	Slc22a18
XM_017594680.1	0.055347	-4.17535	0.0270721	Down	Ppara
XM_008762497.1	0.056158	-4.15437	0.0170301	Down	Nkain4
XM_017590634.1	0.0564856	-4.14597	5.69e-05	Down	Tnfsf10
NM_001191594.1	0.0568551	-4.13657	0.0233201	Down	Mgst3
XM_006232722.2	0.0572385	-4.12687	0.0476777	Down	Slc25a44
XM_008761389.1	0.0573568	-4.12389	0.0279601	Down	Slc16a4
XM_006257361.3	0.058902	-4.08554	0.000818392	Down	Nxt2
XM_017600297.1	0.0600547	-4.05758	0.0464099	Down	Frmpd2
XM_008770445.2	0.0613328	-4.0272	1.1e-05	Down	Ehbp1
NM_001037369.1	0.0620855	-4.0096	0.0318402	Down	Popdc3
NM_001024259.1	0.0627043	-3.99529	0.0340604	Down	Bmpr1b
XM_017592507.1	0.06325	-3.98279	0.00981016	Down	Dync1i1
XM_006237072.3	0.0636527	-3.97363	0.0157397	Down	Tmcc1
XM_006245460.3	0.065438	-3.93373	3.05e-06	Down	Lrrfip1
NM_021853.1	0.066691	-3.90636	6.99e-08	Down	Kcnt1
XM_008766373.2	0.0674059	-3.89098	0.02072	Down	Islr2
XM_006234915.2	0.067825	-3.88204	0.0186574	Down	Dtwd1
XM_017588662.1	0.0683728	-3.87043	1.52e-05	Down	Nrxn2
XM_006236134.3	0.0684434	-3.86894	0.0467368	Down	ST7
XM_017591514.1	0.0686265	-3.86509	0.00477477	Down	Oprl1
XM_006238427.3	0.0689298	-3.85873	0.0355053	Down	Dock7
NM_001025765.1	0.0692595	-3.85184	0.0108026	Down	Zfp90
XM_017594359.1	0.0694152	-3.8486	0.000701814	Down	Hdac9
XM_006233483.3	0.069506	-3.84672	0.00191332	Down	Nexn
XM_017589282.1	0.0701263	-3.8339	0.00725944	Down	Sec31b
XM_008761322.2	0.0709625	-3.8168	0.0117002	Down	Celf3
NM_031787.1	0.071154	-3.81291	0.00247215	Down	Hipk3
XM_008761900.2	0.0714518	-3.80689	5.94e-06	Down	Osbpl6
NM_001107323.1	0.0714627	-3.80667	0.00192248	Down	Tubgcp3
XM_006252108.3	0.0715861	-3.80418	0.00465251	Down	Adra1a
XM_017602163.1	0.0721845	-3.79217	0.0174154	Down	Pls3
XM_008766683.2	0.0739936	-3.75646	0.0191956	Down	Pomgnt2
XM_017599923.1	0.074225	-3.75195	0.00251028	Down	LOC108352965
XM_008764830.2	0.0749684	-3.73757	0.0413707	Down	Bbof1
XM_017599207.1	0.0759335	-3.71912	0.0289672	Down	Zfyve28
XM_017595384.1	0.0760104	-3.71766	0.00189341	Down	LOC680875
XM_006244378.3	0.0762894	-3.71237	0.00146508	Down	Plin4
XM_006244937.3	0.0764747	-3.70887	6.98e-07	Down	Slc39a10
NM_001106276.1	0.0770842	-3.69742	0.0343844	Down	Cpeb1
XM_017601365.1	0.0772423	-3.69447	0.00143734	Down	Pard3
XM_006246347.3	0.0788103	-3.66547	1.02e-06	Down	Kif3a
NM_173140.1	0.0799697	-3.6444	0.0309076	Down	Cryba2
NM_012575.3	0.080446	-3.63584	0.012738	Down	Grin2c
NM_001163002.1	0.0808844	-3.62799	0.00452427	Down	Smim5
XM_008770064.2	0.0810225	-3.62553	0.046367	Down	LOC679894
XM_017595758.1	0.0815262	-3.61659	0.0105753	Down	Arpp21
XM_006235043.3	0.0826209	-3.59735	0.0195389	Down	Gfra4
XM_017595053.1	0.0850086	-3.55625	1.59e-05	Down	Lrrc14
XM_006232076.3	0.0855076	-3.5478	0.00603163	Down	Cdh9
XM_017597124.1	0.0856951	-3.54464	0.00679346	Down	2018-09-04
NM_001191752.1	0.0857029	-3.54451	0.0306896	Down	Ccdc77
XM_006240354.2	0.0858172	-3.54259	0.0196826	Down	Aldh6a1
XM_006250548.3	0.0861724	-3.53663	0.0380958	Down	Rpap2
XM_008773414.1	0.0862232	-3.53578	0.00580942	Down	Tceal1
XM_017595867.1	0.0864381	-3.53219	0.0410682	Down	Ntm
XM_017600706.1	0.0868066	-3.52605	0.03565	Down	Ogn
XM_008763587.2	0.0868905	-3.52466	0.0401391	Down	Epha7
NM_001106819.1	0.0869135	-3.52428	1.53e-05	Down	Nnmt
XM_006232543.1	0.0877329	-3.51074	0.000211099	Down	Arfip1
XM_006245926.2	0.0878299	-3.50914	0.00120342	Down	Tbc1d24
XM_006237620.3	0.088443	-3.49911	0.0289982	Down	Recql
XM_008761833.2	0.0895568	-3.48105	0.00405249	Down	Ccdc148
XM_017591454.1	0.0898676	-3.47605	0.0191067	Down	Gad1
XM_006250801.3	0.0911206	-3.45608	0.00273808	Down	LOC100360977
XM_017588938.1	0.0932351	-3.42298	0.0160449	Down	Rlbp1
NM_001107397.2	0.0932609	-3.42258	0.0147665	Down	Epb41l4a
XM_006241846.2	0.0939988	-3.41121	0.0499055	Down	Rbfox2
XM_006235878.3	0.0944282	-3.40464	0.00012052	Down	Slc4a2
XM_006242959.3	0.0951645	-3.39343	0.00203883	Down	Tmem25
XM_006238494.3	0.0956868	-3.38554	0.0462435	Down	Dab1
XM_008759665.2	0.0960632	-3.37987	0.00688191	Down	Neu3
XM_006252712.3	0.0961819	-3.37809	1.17e-07	Down	Zfp488
XM_006249765.3	0.0963096	-3.37618	0.00103811	Down	Slc45a3
XM_017589926.1	0.0969457	-3.36668	0.0169597	Down	LOC103691005
XM_006256676.3	0.0976174	-3.35672	5.95e-06	Down	Gpr34
XM_017593996.1	0.0979686	-3.35154	0.00784515	Down	Trim9
XM_006242226.3	0.0986105	-3.34212	0.038726	Down	Rabl2a
NM_001107869.1	0.0988188	-3.33907	0.0404885	Down	Dysf
XM_017595407.1	0.099422	-3.33029	3.92e-06	Down	Clasp2
XM_006235854.2	0.0998985	-3.32339	0.0256144	Down	Rnf32
NM_001100653.1	0.10023	-3.31861	0.0385182	Down	Sidt1
XM_017600249.1	0.101376	-3.30221	0.00129463	Down	Dcun1d2
XM_017600393.1	0.101376	-3.30221	0.00129463	Down	NEWGENE_1582994
XM_017592966.1	0.101591	-3.29916	0.0129042	Down	Ccdc136
XM_017592103.1	0.102072	-3.29234	0.0147844	Down	Rapgef1
XM_017591912.1	0.102102	-3.29192	0.0165524	Down	Syndig1
XM_017594831.1	0.102163	-3.29106	3.34e-08	Down	Anks1b
NM_175579.3	0.102692	-3.2836	0.0248325	Down	Wnk4
XM_006247887.3	0.103274	-3.27546	0.0222039	Down	Notum
NM_012703.2	0.10365	-3.27021	0.00948919	Down	Thrsp
XM_006256897.3	0.103745	-3.26889	0.0450874	Down	Ctps2
NM_001170336.1	0.104248	-3.26191	0.00597352	Down	Ltbp4
XM_006256527.2	0.104394	-3.25989	0.0264743	Down	Rev3l
XM_017598062.1	0.104873	-3.25329	7.8e-05	Down	Robo1
XM_017595692.1	0.104959	-3.25211	0.0225707	Down	Sema3f
XM_006243208.3	0.105698	-3.24198	0.00729448	Down	Paqr5
XM_017590518.1	0.106527	-3.23071	5e-08	Down	Sytl2
XM_017590750.1	0.106799	-3.22703	0.037837	Down	Ccna1
XM_006237430.3	0.107277	-3.22059	0.0083011	Down	LOC100362909
XM_008771335.2	0.108159	-3.20878	0.00303454	Down	LOC681180
NM_022707.2	0.108794	-3.20033	0.0363461	Down	Pln
XM_006236431.3	0.108954	-3.1982	0.0239157	Down	Zfp467
NM_001109096.1	0.110624	-3.17626	0.00271144	Down	Gpr75
XM_006234633.3	0.111118	-3.16984	0.012206	Down	Pax6
XM_017597952.1	0.111317	-3.16726	0.00139837	Down	Slc7a4
NM_001134410.1	0.113704	-3.13664	4.93e-07	Down	Tmem132e
XM_006242476.2	0.114759	-3.12332	0.00855316	Down	Kbtbd3
XM_006252944.3	0.115374	-3.11561	0.0187389	Down	Mast3
XM_006255933.2	0.115412	-3.11514	6.34e-05	Down	Vars2
NM_001109285.1	0.116906	-3.09658	0.00217796	Down	C2cd4c
XM_006254497.2	0.117248	-3.09236	0.0145386	Down	Bin1
NM_001013969.1	0.117385	-3.09068	0.00179754	Down	Slc46a1
XM_006252444.3	0.117541	-3.08877	0.00203784	Down	Slitrk5
XM_017597067.1	0.118185	-3.08088	0.00220069	Down	Rpusd1
XM_017595965.1	0.119164	-3.06898	0.0133921	Down	LOC108348070
XM_017598573.1	0.119909	-3.05999	0.020143	Down	Zfp605
NM_001271365.1	0.120091	-3.0578	2.1e-05	Down	Ldlrad4
XM_006246279.2	0.120548	-3.05232	0.000270487	Down	Rapgef6
NM_001108958.1	0.120625	-3.0514	0.049361	Down	Rtf1
XM_008766249.2	0.120626	-3.05138	0.00600282	Down	Lca5
XM_006253184.3	0.120983	-3.04713	0.0121462	Down	Pcm1
NM_134377.1	0.121956	-3.03557	0.000781031	Down	Clstn2
XM_006245953.2	0.122089	-3.03399	0.00501105	Down	Mapk8ip3
XM_006247295.3	0.12248	-3.02938	0.00409951	Down	Atp6v0a1
XM_008771392.2	0.122915	-3.02427	0.0387721	Down	Tmco3
XM_008768992.2	0.124072	-3.01076	0.00105613	Down	N4bp2l1
XM_008761169.2	0.124105	-3.01037	0.0237269	Down	Fam189b
XM_017599765.1	0.124533	-3.0054	0.023401	Down	Gjb2
XM_008763201.2	0.125029	-2.99966	2.62e-07	Down	Wnk1
XM_008759321.2	0.125353	-2.99593	0.00376287	Down	Abcc8
XM_008768263.2	0.125396	-2.99543	0.0343755	Down	Higd1b
XM_017591651.1	0.126076	-2.98764	0.00431855	Down	Mapkap1
NM_001012126.1	0.12621	-2.9861	0.0181974	Down	Slc35g2
XM_017595433.1	0.126703	-2.98048	0.00587184	Down	Acsbg1
XM_017589221.1	0.126752	-2.97992	0.0260793	Down	Tacc2
XM_006239500.2	0.12715	-2.97539	0.0149482	Down	Per3
XM_017590286.1	0.12758	-2.97053	0.00292434	Down	Klc2
XM_008762381.2	0.128248	-2.96299	0.00063617	Down	Epb41l1
XM_017595584.1	0.128408	-2.96119	0.00246133	Down	Tfdp2
XM_006247499.3	0.128612	-2.9589	4.57e-06	Down	Fmnl1
NM_031741.1	0.128774	-2.95709	1.97e-06	Down	Slc2a5
XM_017589997.1	0.129396	-2.95013	0.000221396	Down	Dmwd
NM_001109073.1	0.129726	-2.94647	0.0337628	Down	Ccdc190
NM_001106263.2	0.130174	-2.94148	0.0221711	Down	Htatip2
XM_006237573.3	0.131277	-2.92932	0.0244133	Down	Atf7ip
XM_017598302.1	0.131368	-2.92832	9.27e-06	Down	Cux2
XM_008767063.2	0.13222	-2.91899	0.0193165	Down	Bivm
NM_053755.2	0.132388	-2.91716	0.0364778	Down	Slc26a3
XM_017592942.1	0.133616	-2.90383	0.0130506	Down	Adam22
XM_008766708.2	0.133695	-2.90298	0.0123308	Down	Zbtb47
XM_006255711.3	0.134777	-2.89136	0.005906	Down	Kcng4
XM_006228628.3	0.136045	-2.87785	0.00641444	Down	Lrfn1
XM_017595190.1	0.136046	-2.87784	0.00473275	Down	LOC100910134
XM_006235009.3	0.136228	-2.8759	0.00184345	Down	Lzts3
NM_001025718.1	0.136342	-2.8747	0.00440027	Down	Tfdp1
XM_017601998.1	0.136641	-2.87154	0.0465403	Down	Frmpd4
XM_017590624.1	0.136836	-2.86948	0.0207506	Down	Camk2d
XM_006255307.3	0.137739	-2.85999	0.00129588	Down	Nf1x
XM_017596454.1	0.138312	-2.854	0.0101469	Down	Fam126b
NM_001302089.1	0.138689	-2.85007	0.00400242	Down	Slc1a2
NM_001109223.1	0.139195	-2.84482	0.00465233	Down	Wnt16
XM_008773274.2	0.1392	-2.84477	0.0141887	Down	Gk
XM_008762782.2	0.139758	-2.839	0.0171609	Down	Adck2
XM_006239589.3	0.139825	-2.8383	0.0193161	Down	Mib2
XM_008766152.2	0.140459	-2.83178	8.78e-06	Down	Slc37a4
XM_006238448.3	0.14059	-2.83043	0.0233341	Down	Dnajc6
NM_017336.1	0.140944	-2.8268	0.00301611	Down	Ptpro
NM_057134.1	0.141968	-2.81636	0.00176319	Down	Chrd
XM_017600640.1	0.142149	-2.81452	0.0457709	Down	Aaed1
XM_006250276.3	0.143274	-2.80315	0.000600123	Down	Vangl2
NM_053824.2	0.143896	-2.7969	0.0120437	Down	Csnk2a1
NM_001006993.1	0.144354	-2.79231	0.00797664	Down	Sgcg
XM_017593456.1	0.145388	-2.78202	0.00641985	Down	Ptprf
NM_131906.1	0.145701	-2.77892	2.79e-09	Down	Slco1a2
NM_001012748.1	0.146441	-2.77161	0.000423556	Down	Cdh20
XM_017595977.1	0.147936	-2.75695	0.00159457	Down	RGD1561444
XM_017596659.1	0.147965	-2.75667	0.0263893	Down	Rims1
XM_006228681.3	0.148077	-2.75558	0.0141551	Down	Dpf1
XM_017589387.1	0.148118	-2.75518	0.00215675	Down	Trim66
XM_006241888.3	0.149368	-2.74306	0.0357522	Down	Hsf1
XM_006252738.2	0.149697	-2.73989	0.0381051	Down	Ercc6
XM_006235289.3	0.149729	-2.73957	0.0357478	Down	Kif3b
XM_006246425.3	0.150213	-2.73492	2.04e-08	Down	Mprip
XM_008770663.2	0.150895	-2.72838	0.00735684	Down	Homez
NM_019329.2	0.151033	-2.72707	0.00135048	Down	Cntn3
XM_017596084.1	0.151534	-2.72229	0.0362153	Down	LOC108348205
XM_017600517.1	0.152384	-2.71422	0.000400815	Down	Wnk2
XM_008769562.2	0.153469	-2.70398	9.58e-06	Down	Lmod1
XM_006237812.3	0.154216	-2.69697	0.000160288	Down	Sox17
XM_006233963.1	0.154292	-2.69627	0.0252084	Down	Rabepk
XM_006228271.2	0.154928	-2.69033	0.0216349	Down	Nat14
XM_008773521.2	0.155406	-2.68589	0.0284163	Down	Stag2
XM_017597203.1	0.156515	-2.67562	4.95e-05	Down	Rbfox1
XM_006257528.1	0.157071	-2.67051	8.71e-06	Down	Ocrl
XM_017595439.1	0.158965	-2.65322	0.0151722	Down	Phldb1
XM_006239390.3	0.159811	-2.64556	0.0178787	Down	Mad2l2
XM_003750126.4	0.159867	-2.64505	4.48e-07	Down	Itsn2
NM_017011.1	0.160104	-2.64292	2.14e-06	Down	Grm1
XM_008772621.2	0.16129	-2.63227	7.84e-05	Down	Spg7
XM_017599040.1	0.161566	-2.62981	0.0286448	Down	Nckap5
NM_001107859.1	0.162205	-2.62411	0.0337408	Down	Zfp775
XM_006241442.3	0.162562	-2.62094	0.00171906	Down	Gli1
XM_008767322.1	0.16307	-2.61643	2.45e-06	Down	LOC102556337
XM_008762212.2	0.163102	-2.61615	2.55e-05	Down	Frmd5
NM_001106845.1	0.163433	-2.61323	0.0222961	Down	Ankrd34c
XM_017594785.1	0.163576	-2.61196	0.016507	Down	Rpap3
XM_006229574.3	0.163723	-2.61067	0.0494669	Down	Pnck
XM_006231198.3	0.164564	-2.60328	0.044653	Down	Vldlr
XM_006233134.3	0.164903	-2.60031	0.00475135	Down	Kcna2
XM_008769604.2	0.165577	-2.59442	0.0129034	Down	Fmo2
XM_017600892.1	0.165943	-2.59124	0.0218613	Down	Trim36
XM_006231855.3	0.166753	-2.58422	0.0202052	Down	Ocln
XM_017593419.1	0.167162	-2.58068	0.036715	Down	Crocc
XM_006234275.3	0.167429	-2.57838	0.000292678	Down	Slc4a10
XM_006229504.2	0.167824	-2.57498	0.0224706	Down	Zfand6
XM_017591943.1	0.168462	-2.5695	0.0179881	Down	B3galt1
XM_008771876.2	0.168767	-2.5669	0.0288108	Down	Ero1b
XM_017590847.1	0.169315	-2.56221	0.0238719	Down	Egfem1
NM_012868.1	0.170372	-2.55324	0.0238958	Down	Npr3
XM_006232407.3	0.170444	-2.55263	0.0289684	Down	P2ry12
XM_008767775.2	0.171578	-2.54306	0.00376355	Down	Rnf112
XM_008767469.1	0.171589	-2.54297	0.0351137	Down	LOC100362572
NM_001162935.1	0.172036	-2.53921	8.03e-05	Down	Ctxn2
XM_006251094.2	0.17281	-2.53274	0.00240421	Down	Jakmip1
XM_017595956.1	0.172963	-2.53146	0.00673812	Down	LOC103689995
XM_006248167.2	0.17307	-2.53057	0.0107801	Down	Zfp295
XM_006235867.3	0.173287	-2.52876	0.000223891	Down	Kcnh2
NM_133623.1	0.173364	-2.52812	0.0103448	Down	Slc6a13
NM_001105811.1	0.173437	-2.52751	0.0235108	Down	Rilp
XM_002730053.5	0.174114	-2.5219	0.0158524	Down	LOC100362216
XM_006232296.3	0.174126	-2.5218	0.0193378	Down	Sclt1
NM_053746.1	0.174252	-2.52076	0.0141114	Down	Cntn5
XM_006242534.3	0.174322	-2.52017	0.0365041	Down	Mre11a
NM_053441.1	0.17502	-2.51441	1.06e-07	Down	Slco1c1
XM_006243540.3	0.176147	-2.50515	0.0238204	Down	Plscr5
XM_017600922.1	0.176173	-2.50493	0.00142428	Down	Chst9
XM_017599274.1	0.176466	-2.50254	0.000737314	Down	Slit2
XM_008763026.2	0.177416	-2.49479	0.0112921	Down	Lrrtm4
XM_008760891.2	0.177431	-2.49467	9.98e-05	Down	Pld1
XM_006249702.3	0.177778	-2.49185	0.000421323	Down	Zranb3
XM_017591145.1	0.17791	-2.49078	3.02e-05	Down	Smad9
XM_017597592.1	0.177967	-2.49032	0.0388153	Down	Flywch2
XM_017598528.1	0.178415	-2.48669	0.00404122	Down	Atxn2
XM_008762484.2	0.178877	-2.48296	0.00415325	Down	Kcng1
XM_008768173.2	0.178893	-2.48283	0.0484095	Down	Mbtd1
XM_008770846.2	0.178929	-2.48254	0.00305762	Down	Rcbtb2
XM_017593720.1	0.179172	-2.48058	0.000579236	Down	Phf24
XM_006237774.3	0.17933	-2.47931	0.0169349	Down	Cspp1
XM_008759526.2	0.17978	-2.4757	0.00211195	Down	Mctp2
NM_198778.2	0.182499	-2.45404	0.0128283	Down	Mpped2
XM_008764534.2	0.183232	-2.44826	0.016626	Down	Otof
XM_006247520.3	0.18352	-2.44599	0.00561469	Down	Hexim2
XM_017596716.1	0.183967	-2.44248	0.00165851	Down	LOC360998
NM_020094.2	0.184103	-2.44142	0.00206648	Down	Kcnip2
XM_006250670.3	0.185059	-2.43394	0.00622413	Down	Tmem150c
XM_017596208.1	0.185719	-2.42881	0.0031637	Down	Rbms3
XM_008769313.2	0.185744	-2.42862	0.013485	Down	Acacb
XM_008758812.2	0.186005	-2.42659	0.0269057	Down	Wdr27
XM_006240501.3	0.186007	-2.42657	0.0197385	Down	Unc79
XM_006250471.2	0.186512	-2.42266	0.000117206	Down	Hsd11b1
XM_008762301.2	0.186956	-2.41923	0.0194731	Down	Ggt7
XM_006237749.3	0.187496	-2.41507	0.00130725	Down	Mybl1
XM_017598977.1	0.187598	-2.41428	0.00391963	Down	Lgr6
XM_006246924.3	0.188733	-2.40558	0.00955001	Down	Ksr1
NM_133420.1	0.18908	-2.40293	0.0289093	Down	Chrna2
XM_006231982.3	0.189118	-2.40264	0.0036055	Down	Nim1k
XM_006239296.3	0.190241	-2.3941	1.68e-06	Down	Klhdc7a
XM_006240318.3	0.190897	-2.38913	0.00519272	Down	Rps6kl1
XM_017591994.1	0.192302	-2.37856	0.0108086	Down	Tti1
NM_001109435.1	0.192668	-2.37581	0.0350594	Down	Nxpe3
NM_001107431.1	0.192937	-2.3738	0.041389	Down	Chst5
XM_008760963.2	0.193126	-2.37239	0.00128517	Down	Rslcan18
XM_008768428.2	0.193191	-2.3719	5.81e-05	Down	LOC100911734
XM_017595642.1	0.193468	-2.36983	0.00120379	Down	Elmod1
NM_001107988.1	0.193492	-2.36965	0.00695236	Down	Vwa5b1
XM_017593712.1	0.193576	-2.36903	0.000362473	Down	Nol6
XM_017602376.1	0.193609	-2.36878	0.00873878	Down	Akap17b
XM_017597689.1	0.194302	-2.36362	0.0206741	Down	Msi2
XM_006249354.3	0.194464	-2.36242	6.69e-05	Down	Clip1
XM_017599667.1	0.194985	-2.35857	7.64e-05	Down	Zfp219
XM_017601608.1	0.195042	-2.35814	0.0447136	Down	Pcbp3
XM_008773651.2	0.195143	-2.35739	8.54e-05	Down	Arhgef6
XM_006231538.3	0.195446	-2.35516	0.000602347	Down	Btrc
XM_017594676.1	0.195492	-2.35482	0.025261	Down	Trhr
XM_006243415.3	0.196068	-2.35058	0.0100453	Down	Hmgcll1
XM_017599085.1	0.196453	-2.34774	0.0335322	Down	Ppia
XM_006255302.3	0.196547	-2.34705	0.000927088	Down	Elmod2
XM_006256381.3	0.197187	-2.34237	0.018888	Down	Edar
XM_006253331.3	0.197234	-2.34202	0.00184808	Down	Rnf170
XM_008771126.2	0.197594	-2.33939	0.00247057	Down	Sugp2
XM_017599291.1	0.198091	-2.33577	0.0118834	Down	Pcdh7
XM_006235653.1	0.198254	-2.33458	3.84e-05	Down	Nfatc2
NM_001014190.1	0.198357	-2.33383	3.31e-05	Down	Tmem246
XM_006256587.3	0.198455	-2.33311	0.0434803	Down	Wasf1
XM_017598868.1	0.199827	-2.32317	0.0315917	Down	Esrrg
XM_006253741.3	0.199928	-2.32245	0.00190302	Down	Ecm2
XM_008763477.2	0.2001	-2.32121	0.0159165	Down	Crispld1
XM_017597960.1	0.200466	-2.31857	0.00474405	Down	Arvcf
XM_017598680.1	0.200584	-2.31772	0.00263237	Down	Brinp3
XM_008768045.2	0.20069	-2.31696	0.0388419	Down	Abi3
XM_017590140.1	0.200929	-2.31524	0.0312572	Down	Ano5
XM_008764394.2	0.20105	-2.31437	0.00179629	Down	Plch2
NM_133606.1	0.201137	-2.31375	0.000301455	Down	Ehhadh
XM_006228978.3	0.201977	-2.30774	0.0216701	Down	Syt3
XM_017592440.1	0.202059	-2.30715	0.00970269	Down	Grm3
XM_017594319.1	0.202518	-2.30387	0.00452243	Down	Tmem229b
NM_001025064.1	0.202536	-2.30375	0.0012983	Down	Tigar
XM_008761769.2	0.203381	-2.29775	0.012708	Down	Lypd6b
NM_080780.2	0.204271	-2.29144	0.000409562	Down	P2rx5
XM_017589753.1	0.204501	-2.28982	0.043438	Down	Shisa7
NM_001191891.1	0.204847	-2.28738	0.010578	Down	C1qtnf9
NM_001197023.1	0.204898	-2.28702	3.78e-05	Down	RGD1307443
NM_001128185.1	0.204968	-2.28653	0.00133901	Down	Myadml2
XM_017591130.1	0.20538	-2.28363	0.000619035	Down	Mef2d
XM_006241454.3	0.205418	-2.28337	0.0092166	Down	Arhgef25
XM_017602165.1	0.206463	-2.27605	0.0174768	Down	Sh3kbp1
XM_006245377.3	0.2067	-2.27439	0.0222617	Down	Trip12
XM_006244091.3	0.206942	-2.2727	0.000157421	Down	Hhatl
XM_006250417.2	0.206953	-2.27263	0.0374012	Down	Lin9
XM_017596482.1	0.207084	-2.27171	0.000605801	Down	Slc19a3
XM_017598627.1	0.20717	-2.27111	0.00957331	Down	LOC100362819
XM_017588735.1	0.207288	-2.27029	0.0123768	Down	Psd
XM_006227982.3	0.208912	-2.25904	0.00136178	Down	Rgmb
XM_017590589.1	0.209225	-2.25687	0.00199972	Down	Nlgn1
XM_017597392.1	0.20957	-2.2545	0.0308548	Down	Luc7l3
XM_006252490.3	0.209573	-2.25448	0.0135044	Down	Dock9
XM_003751096.4	0.210912	-2.24528	0.0472762	Down	Lrrc74b
XM_006235754.3	0.210985	-2.24479	8.55e-06	Down	Tpd52l2
NM_024394.2	0.211367	-2.24218	0.0131621	Down	Htr3a
XM_017596627.1	0.211538	-2.24101	2.43e-05	Down	Dlgap1
NM_001191845.1	0.212147	-2.23687	0.00124957	Down	Hey1
NM_001271118.1	0.212687	-2.2332	0.00393175	Down	Nrg1
XM_006248046.3	0.212917	-2.23164	0.00137082	Down	Cryzl1
XM_008763849.2	0.213693	-2.22639	0.00199324	Down	Elavl2
XM_008763166.2	0.213753	-2.22598	0.0475703	Down	Cntn4
NM_001134498.2	0.21408	-2.22378	5.12e-05	Down	Rbfox3
NM_053324.1	0.214945	-2.21796	0.0137375	Down	Syt9
XM_017590857.1	0.215293	-2.21562	0.0134768	Down	Plk4
NM_001107401.1	0.215341	-2.21531	0.00165111	Down	Nol4
XM_017594336.1	0.215358	-2.21519	0.00106743	Down	Fkbp1b
NM_080688.1	0.215436	-2.21467	0.000632753	Down	Plcd4
XM_003751297.4	0.215707	-2.21285	0.0063043	Down	Syt14
XM_017595708.1	0.215939	-2.21131	0.00117427	Down	Myrip
NM_001163723.1	0.215951	-2.21123	0.0370933	Down	Smim1
XM_008771766.2	0.216026	-2.21072	0.00950173	Down	Arid4b
XM_006257444.3	0.216166	-2.20979	0.00366132	Down	Klhl13
XM_006254301.3	0.216293	-2.20894	0.0312871	Down	Cacnb2
XM_008765128.2	0.216502	-2.20754	0.00211365	Down	Matk
XM_017598374.1	0.216651	-2.20656	0.0160434	Down	Brca2
XM_006245276.1	0.217034	-2.20401	3.52e-05	Down	Dnajb2
NM_001109233.2	0.217052	-2.20389	0.0016396	Down	Hoxa7
XM_008760379.2	0.21743	-2.20138	0.0108174	Down	Cpeb3
XM_006240243.3	0.217984	-2.1977	0.0445851	Down	Zbtb1
XM_008759492.2	0.217991	-2.19766	1.73e-05	Down	Sv2b
XM_006232164.3	0.218411	-2.19488	0.00235216	Down	Zfhx4
XM_017599823.1	0.218734	-2.19275	0.0102302	Down	NEWGENE_621802
XM_006240727.2	0.218904	-2.19163	0.0347124	Down	Dnajc14
NM_001033955.1	0.219084	-2.19044	1.67e-05	Down	Calca
XM_017597686.1	0.21931	-2.18896	3.45e-05	Down	Tspoap1
XM_006240545.3	0.219529	-2.18752	0.00259767	Down	Wdr25
XM_008762193.2	0.219541	-2.18744	0.00597003	Down	RGD1565616
XM_008764304.1	0.219981	-2.18455	0.00954607	Down	RGD1566083
XM_008761140.2	0.22019	-2.18318	0.0197026	Down	Pear1
XM_017592722.1	0.220241	-2.18285	0.00753464	Down	C2cd5
XM_017595547.1	0.220503	-2.18113	0.000469558	Down	Tecta
XM_017597460.1	0.220599	-2.1805	0.0410436	Down	Trpv3
XM_017593120.1	0.220936	-2.1783	0.00019335	Down	Ptpru
XM_008765331.2	0.221248	-2.17626	0.0183662	Down	Ppfia2
XM_017602111.1	0.221256	-2.17621	0.00698145	Down	Armcx6
XM_006247602.3	0.22128	-2.17606	0.0378444	Down	Arsg
NM_001071777.1	0.221368	-2.17548	2.79e-05	Down	Gpr17
XM_006233692.1	0.222352	-2.16908	0.015243	Down	RGD1564379
XM_006242337.3	0.222505	-2.16809	0.0129056	Down	Csrnp2
XM_006245179.3	0.222678	-2.16697	0.00220863	Down	Glb1l
NM_199106.1	0.223186	-2.16368	0.00638808	Down	Galnt13
NM_031349.2	0.223208	-2.16354	5.67e-05	Down	Aplnr
XM_006243865.3	0.223901	-2.15907	0.000291159	Down	Dock3
NM_001126273.1	0.224249	-2.15682	0.00923936	Down	Alkbh2
XM_008769668.2	0.225813	-2.1468	0.0424819	Down	Fam163a
XM_006230294.3	0.22594	-2.14599	0.0144868	Down	LOC361646
XM_017602070.1	0.226929	-2.13968	0.0025494	Down	Wnk3
XM_017589151.1	0.227031	-2.13904	0.00774808	Down	Tmem143
NM_001013965.1	0.227581	-2.13555	0.0423068	Down	Tekt4
XM_006252330.2	0.227649	-2.13512	0.0131387	Down	Kctd4
XM_001056825.5	0.229512	-2.12336	1.53e-05	Down	Golm1
XM_017594151.1	0.229529	-2.12325	0.0177755	Down	Entpd5
NM_198791.1	0.230393	-2.11783	0.0015096	Down	Tlr3
XM_006244425.3	0.230499	-2.11717	0.00268753	Down	Trem2
XM_008770942.1	0.231018	-2.11392	0.00127977	Down	Sox21
NM_031696.1	0.23141	-2.11147	0.0218375	Down	Gpr88
XM_006236526.3	0.231464	-2.11114	0.00498227	Down	Hoxa3
XM_236272.7	0.231711	-2.1096	0.00222521	Down	Exph5
XM_006252369.3	0.231748	-2.10937	0.0391516	Down	Mtrf1
XM_017600950.1	0.231887	-2.10851	0.00935781	Down	Ablim3
XM_006230893.3	0.232131	-2.10699	0.000226726	Down	Dhcr7
XM_006238094.2	0.232157	-2.10683	0.00159672	Down	RGD1309821
XM_006233578.3	0.232289	-2.10601	0.000308275	Down	Cacna1b
XM_017589174.1	0.232636	-2.10386	0.000396519	Down	Tenm4
XM_017591445.1	0.232835	-2.10262	0.000121487	Down	Kcnq2
XM_002729579.4	0.232838	-2.1026	0.0312489	Down	Tmem52
NM_001004132.1	0.233166	-2.10057	0.00455533	Down	Cdk16
NM_001107683.1	0.233292	-2.09979	0.00126534	Down	Slitrk3
XM_017589322.1	0.233699	-2.09728	0.00102195	Down	Ptprk
XM_006236798.3	0.234096	-2.09483	0.000447362	Down	Nat8f3
XM_017598853.1	0.234107	-2.09476	0.0234137	Down	Enah
XM_006242930.3	0.234752	-2.09079	0.00340588	Down	Ift46
NM_001025048.1	0.235523	-2.08606	0.003593	Down	Setmar
NM_001100473.1	0.235591	-2.08564	6.11e-05	Down	Wnt7a
XM_006234996.2	0.235737	-2.08475	0.0382938	Down	RGD1561442
XM_006251170.3	0.236157	-2.08218	0.0130541	Down	Camk2b
XM_006243510.3	0.236461	-2.08033	0.00281557	Down	Zfp949
XM_008761603.2	0.23656	-2.07972	0.000145149	Down	Rabl6
XM_017591691.1	0.236705	-2.07884	0.000932716	Down	Klhl23
XM_006244088.3	0.236733	-2.07867	0.000796737	Down	Exog
NM_001127657.2	0.237719	-2.07267	0.0277399	Down	Spin2a
NM_001108692.1	0.238564	-2.06755	0.00377441	Down	Arhgef19
XM_017592938.1	0.23966	-2.06094	0.0312323	Down	Fastk
XM_006253232.3	0.240272	-2.05726	0.00873844	Down	Dusp26
XM_006244437.3	0.240305	-2.05706	0.00229246	Down	Frs3
NM_001033675.1	0.24092	-2.05337	0.00012068	Down	Cabp1
XM_017588651.1	0.241296	-2.05112	8.05e-05	Down	Asah2
XM_017599810.1	0.241401	-2.0505	0.000707231	Down	Gjb6
XM_017589074.1	0.242025	-2.04677	0.000457916	Down	Gabra5
XM_017599251.1	0.242276	-2.04527	0.0426309	Down	RGD1305110
NM_001168631.1	0.242339	-2.0449	0.000134535	Down	Cdh10
XM_006256717.3	0.242392	-2.04459	0.0347388	Down	Porcn
XM_008769229.1	0.242598	-2.04336	0.0366248	Down	Kntc1
XM_017595072.1	0.242832	-2.04197	0.00499455	Down	Nxph4
XM_017600165.1	0.24307	-2.04056	0.00343279	Down	Vstm4
XM_017598641.1	0.243124	-2.04024	0.0463632	Down	Nfasc
NM_001106739.1	0.243152	-2.04007	0.010095	Down	Six4
XM_017592406.1	0.243257	-2.03944	0.0116382	Down	Sox5
XM_008770489.2	0.243655	-2.03709	0.00369789	Down	Camk2g
XM_006247588.2	0.243709	-2.03677	0.00382318	Down	Strada
XM_006229031.3	0.244046	-2.03478	0.0201504	Down	Sult2b1
XM_017588779.1	0.244391	-2.03274	0.00246669	Down	Grm5
XM_006253860.2	0.244449	-2.03239	0.00060932	Down	Ppp1r3g
NM_001013953.1	0.244825	-2.03018	0.0158789	Down	Ccdc153
XM_008770813.2	0.245016	-2.02905	0.0109546	Down	Ppp3cc
NM_053937.1	0.245702	-2.02502	0.0284625	Down	Kcnh6
XM_008768124.2	0.246488	-2.02041	0.00224032	Down	Cntnap1
XM_006232596.3	0.246634	-2.01956	6.31e-05	Down	Bcan
NM_053880.2	0.247082	-2.01694	0.000810945	Down	Dync1i2
XM_017592534.1	0.247545	-2.01424	0.0410692	Down	Thnsl2
XM_006252176.3	0.248002	-2.01158	0.00675427	Down	Dleu7
NM_001012032.1	0.248508	-2.00864	0.00496806	Down	Arhgap24
XM_006236092.3	0.24881	-2.00688	0.0121074	Down	Ica1
NM_024375.1	0.248922	-2.00623	0.0496695	Down	Gdf10
XM_008767249.2	0.249099	-2.00521	0.0109884	Down	Epha4
XM_006248699.3	0.249396	-2.00349	0.0141064	Down	Klhl22
NM_001270592.1	0.249426	-2.00332	0.0106295	Down	Tmem176b
XM_017594276.1	0.249472	-2.00305	0.000649097	Down	Nrcam
NM_134463.1	0.249505	-2.00286	0.0051799	Down	Sgk2
NM_001108358.1	0.249718	-2.00163	0.00208319	Down	Lnx1
NM_001034925.2	0.249756	-2.00141	0.000191657	Down	Cpt1c
XM_006246888.3	0.250305	-1.99824	0.00699745	Down	Coro6
NM_001025038.1	0.251358	-1.99218	0.0430619	Down	Mettl24
XM_006240647.3	0.251429	-1.99178	0.0399826	Down	Zbtb42
XM_006240172.3	0.251522	-1.99124	0.000562939	Down	Cdkl1
XM_008770252.2	0.252304	-1.98677	0.00160584	Down	Ddc
NM_001271210.1	0.252403	-1.9862	0.012329	Down	Ralgapb
XM_008762730.2	0.252417	-1.98612	0.00442303	Down	Zfp804b
NM_001107070.1	0.252435	-1.98602	0.0001342	Down	Engase
XM_006243800.1	0.2526	-1.98507	0.000806927	Down	Pik3r4
NM_053832.1	0.252633	-1.98489	0.000392404	Down	Foxj1
XM_008764524.2	0.25285	-1.98365	0.0352625	Down	Agbl5
NM_139090.1	0.253568	-1.97955	0.0408005	Down	Acvr1c
NM_199118.1	0.254231	-1.97579	4.82e-06	Down	Gaa
XM_017593238.1	0.254505	-1.97424	0.0452644	Down	Galt
XM_017589942.1	0.254716	-1.97304	0.000337438	Down	Zfp606
XM_017600944.1	0.25501	-1.97137	0.0172606	Down	Kcng2
XM_006231183.2	0.255029	-1.97127	0.00237639	Down	Smc5
XM_006248451.3	0.2554	-1.96917	0.046099	Down	Osbpl11
XM_006243491.3	0.255563	-1.96825	0.00144753	Down	Snap91
XM_017594645.1	0.255724	-1.96734	0.007269	Down	Tnrc6b
XM_006253273.3	0.2559	-1.96635	0.0287897	Down	LOC302192
XM_017592425.1	0.256247	-1.96439	0.00112755	Down	Grip2
NM_001109173.1	0.256604	-1.96238	0.0104277	Down	Gpr150
XM_017590817.1	0.257256	-1.95872	0.0270878	Down	Pde8b
XM_008762771.2	0.257395	-1.95794	0.0457394	Down	Ahcyl2
XM_006241243.1	0.257663	-1.95644	0.0082248	Down	Actr6
XM_017595700.1	0.258028	-1.9544	0.000341379	Down	Entpd3
XM_006252410.3	0.258878	-1.94965	0.00557919	Down	Klf12
XM_006248571.2	0.258979	-1.94909	0.0403561	Down	Vwa5b2
XM_017601638.1	0.259034	-1.94878	0.0019474	Down	Vwa7
XM_017592688.1	0.259056	-1.94866	0.0239032	Down	Herc3
NM_001107496.1	0.259322	-1.94718	0.00338473	Down	Dyrk1b
NM_001109243.1	0.260035	-1.94322	0.0003736	Down	Eva1a
XM_017589165.1	0.260104	-1.94284	0.0351304	Down	Man2a2
XM_017596784.1	0.260388	-1.94127	0.000215434	Down	Dst
NM_001012237.1	0.260804	-1.93896	0.00556489	Down	Fam20a
XM_006249500.3	0.260892	-1.93847	0.00895526	Down	Tmem119
XM_006246817.3	0.260987	-1.93795	0.0158525	Down	Aspa
XM_006233845.2	0.261221	-1.93666	0.017849	Down	Tsc1
XM_008761220.2	0.261295	-1.93625	0.00059096	Down	Arhgef11
XM_017588697.1	0.261344	-1.93598	0.000424817	Down	Rps6ka2
XM_008769013.2	0.261375	-1.93581	0.000377296	Down	Pnpla6
XM_006253754.2	0.261826	-1.93332	0.00213236	Down	Cap2
NM_001107964.1	0.262346	-1.93046	0.0186084	Down	Tmem53
NM_001107796.1	0.262767	-1.92814	0.000943924	Down	Fam83d
NM_001107520.1	0.263528	-1.92397	0.00546417	Down	Herc2
XM_006238459.3	0.263898	-1.92195	0.0468098	Down	Tctex1d1
XM_017592058.1	0.263967	-1.92157	0.0335663	Down	Scn1a
NM_001113357.1	0.264131	-1.92068	0.0216233	Down	Npy1r
XM_006240878.3	0.26429	-1.91981	5.04e-05	Down	Apc2
XM_017601459.1	0.264336	-1.91956	7.82e-05	Down	Pcnx2
XM_017599227.1	0.264777	-1.91715	0.0225679	Down	Cobl
XM_006256367.3	0.264874	-1.91662	0.000390249	Down	Rtkn2
XM_006251774.3	0.265138	-1.91518	0.000388456	Down	Ddhd1
XM_006233841.2	0.265181	-1.91495	0.00996447	Down	LOC499770
XM_008768463.1	0.265288	-1.91437	0.0347166	Down	Gps1
NM_198758.2	0.265462	-1.91342	0.0180118	Down	Rundc3a
XM_017592637.1	0.265827	-1.91144	9.3e-05	Down	Prickle2
XM_017595274.1	0.266111	-1.9099	0.0173269	Down	RGD1566029
XM_017597951.1	0.266135	-1.90977	0.000275976	Down	Aifm3
XM_017596698.1	0.266396	-1.90836	0.0190757	Down	LOC691414
XM_006240299.3	0.266398	-1.90834	0.00312247	Down	Pcnx1
XM_006238921.3	0.266948	-1.90537	0.0293718	Down	Hpca
XM_220517.7	0.267136	-1.90435	0.0119729	Down	Pld6
XM_017594748.1	0.267154	-1.90426	0.0372373	Down	Trps1
XM_006242599.3	0.267238	-1.9038	0.00269758	Down	Smarca4
XM_017591196.1	0.267249	-1.90374	0.00409473	Down	Ranbp3l
XM_008760321.2	0.267355	-1.90317	0.000545057	Down	Lipa
XM_017588739.1	0.268255	-1.89832	4.14e-05	Down	Dkk3
XM_017593403.1	0.268487	-1.89708	0.00261675	Down	Zmym4
XM_236724.7	0.269094	-1.89382	0.00105904	Down	Fam198a
XM_017593343.1	0.269194	-1.89328	0.00150191	Down	Fbxl4
XM_017596511.1	0.269307	-1.89268	0.00264897	Down	Aff3
NM_080898.2	0.269414	-1.8921	0.00612043	Down	Trpc5
XM_006241294.3	0.269565	-1.8913	0.000260964	Down	Atp2b1
XM_006247203.3	0.269565	-1.89129	0.00260216	Down	Epn3
XM_008765551.2	0.269884	-1.88959	0.000865395	Down	Eef1d
NM_001191874.1	0.269967	-1.88914	0.000589844	Down	Garem2
XM_017590994.1	0.270221	-1.88779	0.00010833	Down	Fstl5
NM_001169133.2	0.270245	-1.88766	0.000162966	Down	Tenm3
XM_017588870.1	0.270402	-1.88682	0.0300931	Down	Armt1
NM_001305047.1	0.271238	-1.88237	0.0230721	Down	Nfe2l3
NM_053988.1	0.271339	-1.88183	4.78e-05	Down	Calb2
XM_017600489.1	0.271362	-1.88171	0.000124738	Down	Hecw1
XM_008768843.2	0.271505	-1.88095	9.66e-05	Down	Dnm1l
XM_001053512.5	0.271796	-1.8794	0.0388169	Down	Lypd6
XM_001071392.6	0.272565	-1.87533	0.0106019	Down	Nrip2
XM_006255588.2	0.272691	-1.87466	0.000510495	Down	Zfp612
XM_017593438.1	0.273216	-1.87189	0.0284782	Down	Mast2
XM_006246448.3	0.27333	-1.87128	0.0305286	Down	Wnt9a
XM_017595065.1	0.273559	-1.87008	0.0301786	Down	Ncald
XM_008762784.1	0.273685	-1.86941	0.00309277	Down	Tspan12
XM_006253399.2	0.27403	-1.8676	0.0341775	Down	Tdrp
NM_001106784.1	0.274246	-1.86646	0.0155426	Down	Lgr5
NM_001276708.1	0.274824	-1.86342	0.000108486	Down	Srebf1
NM_001277160.1	0.275272	-1.86107	0.0194468	Down	Rbm26
XM_006246434.3	0.275431	-1.86024	0.00217705	Down	Prpsap2
XM_017597621.1	0.275731	-1.85867	0.0340284	Down	Atp10b
XM_017592568.1	0.276246	-1.85598	0.0277416	Down	Sema3a
XM_008762390.2	0.276251	-1.85595	0.0168587	Down	Nnat
NM_001134839.1	0.276256	-1.85592	0.000898102	Down	Ly6h
NM_203367.2	0.277377	-1.85008	0.00049792	Down	Zmynd11
XM_017597871.1	0.277634	-1.84875	0.010125	Down	Casr
XM_008763188.2	0.27768	-1.84851	0.0257078	Down	Setd5
XM_006255051.3	0.277776	-1.84801	0.0177451	Down	Car7
XM_006255187.2	0.278354	-1.84501	0.0284654	Down	Tox3
XM_017601950.1	0.278359	-1.84498	0.0298967	Down	Gria3
XM_017596276.1	0.278468	-1.84442	8.35e-05	Down	Slc4a3
XM_006247041.3	0.278557	-1.84396	0.0223293	Down	Tada2a
XM_006248003.3	0.278634	-1.84356	0.000279452	Down	Chodl
XM_006241183.3	0.278894	-1.84221	0.00114648	Down	Rfx4
XM_008762944.2	0.279242	-1.84041	0.000717492	Down	LOC100909604
NM_001100524.1	0.279445	-1.83936	0.0427644	Down	Pcdh18
NM_001109237.1	0.27962	-1.83846	0.0152058	Down	Neurod6
NM_031699.2	0.279696	-1.83807	0.000882656	Down	Cldn1
XM_017600992.1	0.280081	-1.83608	0.0493531	Down	Paip2
XM_017589152.1	0.280313	-1.83489	0.0336457	Down	Cyfip1
XM_008765780.2	0.280915	-1.83179	0.00856111	Down	Rapgef3
XM_006236777.3	0.281034	-1.83118	0.00555774	Down	Wdr54
XM_017598775.1	0.281481	-1.82889	0.0307193	Down	Kcnj10
XM_017601306.1	0.281486	-1.82887	0.0432169	Down	Def8
XM_008764109.1	0.282	-1.82623	0.045534	Down	Kcnq4
XM_006245284.3	0.282091	-1.82577	0.00228366	Down	Tmem169
NM_001108963.1	0.282292	-1.82474	0.023804	Down	Slc2a10
NM_001135603.1	0.283236	-1.81992	0.0169416	Down	Celf5
XM_006247128.3	0.284043	-1.81582	0.0357822	Down	Stxbp4
XM_006232517.3	0.284211	-1.81497	0.00139778	Down	Tmem144
XM_008766012.2	0.284263	-1.8147	0.000168388	Down	Zfp717
XM_003751958.4	0.284364	-1.81419	0.00623952	Down	LOC100910795
XM_008767199.2	0.284401	-1.814	0.000235391	Down	Map2
XM_008768800.2	0.284619	-1.8129	0.0394535	Down	Atp13a5
NM_001107587.1	0.284639	-1.81279	0.0118707	Down	Slitrk2
XM_017588968.1	0.285286	-1.80952	0.0251347	Down	Sox6
XM_008759047.2	0.285314	-1.80938	0.0279418	Down	Dmpk
NM_001191811.1	0.286038	-1.80572	0.0023864	Down	Sgpp2
XM_008764895.2	0.286512	-1.80333	0.00307066	Down	Ism2
NM_012869.1	0.286754	-1.80211	0.0135968	Down	Npy5r
XM_017600137.1	0.286938	-1.80119	0.01442	Down	Unc5d
NM_001164103.1	0.28695	-1.80113	0.0146345	Down	Add3
XM_006239570.3	0.287019	-1.80078	0.00917024	Down	Mmel1
NM_001030045.1	0.287172	-1.80001	0.0246018	Down	Magi1
XM_008767055.2	0.287185	-1.79995	0.0102065	Down	RGD1310819
XM_017594232.1	0.287337	-1.79918	0.0071193	Down	Ttc7b
NM_001270655.1	0.287572	-1.79801	0.00476643	Down	Ntrk3
NM_175578.3	0.287912	-1.7963	8.57e-05	Down	Rcan2
XM_017591161.1	0.28905	-1.79061	0.012382	Down	Adgrv1
NM_001024341.1	0.289291	-1.78941	0.00184064	Down	Fam110b
XM_008761130.2	0.28945	-1.78861	0.0157995	Down	Gpatch4
XM_006244971.2	0.289578	-1.78798	0.00175226	Down	Carf
XM_006232990.3	0.28998	-1.78598	0.00726219	Down	Car14
NM_001106940.1	0.290137	-1.78519	0.0028978	Down	Lpar4
XM_006237844.3	0.290583	-1.78298	0.010624	Down	Tox
XM_006252671.3	0.290712	-1.78234	0.0308588	Down	Dnah12
XM_006244260.3	0.290889	-1.78146	0.0362978	Down	St6gal2
XM_002728195.5	0.291009	-1.78086	0.0285442	Down	Klhl33
XM_006253053.3	0.291198	-1.77993	0.00022838	Down	Psd3
XM_006245812.3	0.291285	-1.7795	0.0277726	Down	Cdip1
XM_006234507.3	0.291327	-1.77929	0.00580755	Down	Kbtbd4
XM_017598080.1	0.291379	-1.77903	0.0331671	Down	Robo2
NM_001100637.1	0.291572	-1.77807	0.0471695	Down	Trim23
XM_017601970.1	0.291864	-1.77663	0.0111325	Down	Hs6st2
XM_006238585.3	0.291982	-1.77605	0.0160968	Down	LOC108348114
XM_017599604.1	0.292224	-1.77486	0.0492043	Down	Fam149b1
NM_001098724.1	0.292623	-1.77288	0.000298261	Down	Necab3
XM_006244636.3	0.292967	-1.77119	0.00137513	Down	LOC100911625
XM_006237330.3	0.293084	-1.77061	0.00146845	Down	Eno2
NM_001025128.1	0.293392	-1.7691	0.0187061	Down	Gatsl3
XM_006237906.3	0.293488	-1.76863	0.0358959	Down	Triqk
NM_001309463.1	0.293602	-1.76807	0.00686985	Down	Prrt3
NM_001008880.1	0.294385	-1.76422	0.000106018	Down	Scn4b
XM_017591412.1	0.294452	-1.7639	0.00158576	Down	Cdh12
NM_001177326.2	0.294468	-1.76381	0.00697761	Down	Hoxc8
NM_001107522.1	0.294561	-1.76336	0.00243828	Down	Slc35d3
XM_017594343.1	0.294705	-1.76266	0.0057221	Down	Akap6
XM_017593340.1	0.294875	-1.76182	0.00198703	Down	Adgrb2
XM_008773426.1	0.295792	-1.75734	0.00135828	Down	Tmem164
XM_006247864.3	0.296111	-1.75579	0.0495594	Down	Tbcd
NM_001007668.1	0.297177	-1.7506	0.0431879	Down	Ubald1
XM_017591722.1	0.297304	-1.74999	0.00740936	Down	Lrrc4c
XM_017595425.1	0.29734	-1.74982	0.0146752	Down	Snrk
XM_006257362.3	0.297466	-1.74921	0.0141868	Down	Ccdc65
NM_001103354.2	0.29748	-1.74914	0.00020106	Down	LOC100125362
XM_006232871.3	0.297596	-1.74857	0.00118469	Down	Tdrkh
XM_017593801.1	0.298262	-1.74535	0.013801	Down	Rnf220
XM_006246854.3	0.298601	-1.74371	0.0204695	Down	LOC100912483
XM_017593606.1	0.298631	-1.74356	0.0349703	Down	Tmeff1
XM_008769687.2	0.298643	-1.74351	0.000947432	Down	Colgalt2
XM_006255587.3	0.298781	-1.74284	0.0157093	Down	Chst4
XM_006239641.3	0.298984	-1.74186	0.00071672	Down	Atl2
NM_001039505.2	0.300127	-1.73636	0.0268641	Down	Irx2
XM_017596377.1	0.300339	-1.73534	0.000210904	Down	Mff
XM_017594131.1	0.301046	-1.73195	0.00198028	Down	Mboat2
XM_017595086.1	0.301178	-1.73131	0.000518872	Down	Plec
XM_006242279.3	0.301769	-1.72848	0.00021188	Down	Slc38a1
NM_022860.2	0.301852	-1.72809	0.00132286	Down	B4galnt1
XM_017592712.1	0.301882	-1.72795	0.00274525	Down	Fam234b
XM_017597289.1	0.301928	-1.72772	0.00271164	Down	Rap1gap2
NM_001245978.1	0.302383	-1.72555	0.0114421	Down	Frem2
XM_017589548.1	0.302433	-1.72531	0.000384053	Down	Tulp4
NM_053521.1	0.302665	-1.72421	0.000132641	Down	Slc5a7
XM_006247691.3	0.302668	-1.72419	0.00220579	Down	Btbd17
NM_001109189.1	0.302695	-1.72406	0.00163535	Down	Lingo4
NM_001014098.1	0.303079	-1.72224	0.0335404	Down	Ccdc51
XM_017593214.1	0.303451	-1.72046	0.000206811	Down	Kcnab2
XM_006235887.3	0.303734	-1.71912	0.014924	Down	Smarcd3
NM_053506.2	0.303983	-1.71794	0.00362398	Down	Hrh3
NM_001111056.1	0.304058	-1.71758	0.0308403	Down	Adarb1
XM_006246801.3	0.304285	-1.71651	0.00015532	Down	Camkk1
XM_017599064.1	0.304319	-1.71635	0.000439677	Down	Add1
XM_003750609.4	0.304525	-1.71537	0.00488818	Down	Clec3b
XM_006236283.3	0.304683	-1.71462	0.00879819	Down	Slc13a4
XM_017595428.1	0.304813	-1.714	0.0231628	Down	Cyb5r4
XM_341993.8	0.305606	-1.71026	0.00169258	Down	Snx32
NM_001100862.1	0.305621	-1.71018	0.0317933	Down	Fam13a
NM_001106892.1	0.305767	-1.7095	0.000114566	Down	Enpp4
XM_006246477.3	0.30617	-1.70759	0.00497952	Down	Guk1
XM_006246835.3	0.306691	-1.70514	0.00500255	Down	Arhgap44
XM_017600822.1	0.306898	-1.70417	0.0101826	Down	Pcdha4
XM_017595067.1	0.306957	-1.70389	0.01938	Down	Sult4a1
XM_008766331.2	0.307154	-1.70297	0.00298438	Down	Tmod2
XM_006246954.3	0.307203	-1.70274	0.000972198	Down	Sez6
NM_001170439.1	0.307816	-1.69986	0.00293706	Down	Evc
XM_017597318.1	0.308117	-1.69845	0.048625	Down	Krt25
NM_001107693.1	0.30827	-1.69774	0.0331648	Down	Pogz
XM_017589105.1	0.308676	-1.69583	0.0189953	Down	Zim1
XM_017597547.1	0.308701	-1.69572	0.0447987	Down	Myh10
XM_006238793.3	0.308836	-1.69509	0.00476933	Down	Mycl
XM_006244664.2	0.30893	-1.69465	0.00529446	Down	Fam135a
XM_008762854.1	0.308997	-1.69434	0.0029155	Down	LOC102556178
NM_031783.1	0.309008	-1.69428	0.000128784	Down	Nefl
XM_006247443.3	0.309852	-1.69035	0.0045226	Down	Krt222
XM_006238104.2	0.309934	-1.68997	0.0111819	Down	Clta
XM_006248266.3	0.309952	-1.68989	0.0440016	Down	Cd47
XM_006233822.3	0.309975	-1.68977	0.00427632	Down	Sh3glb2
XM_017593985.1	0.310432	-1.68765	0.0255059	Down	Nrxn3
XM_017593765.1	0.310536	-1.68717	0.00822181	Down	Sgip1
XM_017595464.1	0.310738	-1.68623	0.00133348	Down	Ncam1
NM_001309404.1	0.310846	-1.68573	0.0105285	Down	Kcnn2
XM_017599746.1	0.311098	-1.68456	0.00378108	Down	Dmtn
XM_006233555.3	0.311239	-1.6839	0.0191256	Down	Grin1
NM_017029.2	0.311752	-1.68153	0.000144487	Down	Nefm
XM_017591064.1	0.31179	-1.68135	0.0406414	Down	Trpc3
XM_017591290.1	0.311802	-1.6813	0.0174064	Down	Dchs2
NM_171996.3	0.31183	-1.68117	0.0176049	Down	Decr2
XM_017589493.1	0.3121	-1.67992	0.00667297	Down	Jakmip3
XM_006242058.2	0.312176	-1.67957	0.00136605	Down	Pacsin2
NM_080884.1	0.312529	-1.67794	0.0356639	Down	Nat8f5
NM_001108234.1	0.313888	-1.67168	0.00188881	Down	Neu4
NM_001044233.2	0.313951	-1.67139	0.000503977	Down	Clec2l
XM_008762165.2	0.31414	-1.67052	0.00152373	Down	Smox
XM_006241634.1	0.314249	-1.67002	0.00997979	Down	Fam49b
XM_017594742.1	0.314259	-1.66997	0.00120511	Down	Dctn2
XM_017589448.1	0.314528	-1.66874	0.0489179	Down	Rfx3
XM_017601540.1	0.314585	-1.66848	0.0012107	Down	Mog
XM_006249668.3	0.314638	-1.66824	0.0239997	Down	Insig2
XM_008761919.2	0.314826	-1.66737	0.0394422	Down	Scn3a
XM_008761996.2	0.314909	-1.66699	0.00329678	Down	Zfp804a
NM_001282336.1	0.315509	-1.66425	0.000356665	Down	Enho
NM_001159656.1	0.315635	-1.66367	0.00164439	Down	Gnas
XM_017595389.1	0.315697	-1.66339	0.0368255	Down	Eppk1
XM_006230715.3	0.315915	-1.66239	0.0178857	Down	Ppfia1
XM_006250597.3	0.315996	-1.66202	0.00609827	Down	Btbd8
XM_017591564.1	0.316073	-1.66167	0.0331596	Down	Chst1
NM_145769.3	0.316192	-1.66113	0.000565104	Down	Lgi1
XM_006231843.3	0.316902	-1.65789	0.0344843	Down	Cartpt
XM_006246521.3	0.317222	-1.65643	0.00248044	Down	Epn2
XM_017595119.1	0.317451	-1.6554	0.0151176	Down	Mapk11
NM_001105819.1	0.317992	-1.65294	0.000861933	Down	Rhbdl3
NM_001271301.1	0.318099	-1.65245	0.00241683	Down	Sptssb
XM_017602049.1	0.318115	-1.65238	0.00976322	Down	Zdhhc15
NM_001144870.1	0.319208	-1.64743	0.00804476	Down	Vstm5
XM_006228887.3	0.319958	-1.64405	0.00125014	Down	Rhpn2
XM_006257074.3	0.3201	-1.6434	0.0342635	Down	Stard8
XM_017598763.1	0.320128	-1.64328	0.00135177	Down	Cdh7
XM_008767829.2	0.320393	-1.64209	0.00776112	Down	Neurl4
XM_006254233.2	0.320704	-1.64069	0.0120781	Down	Usp6nl
XM_006236032.3	0.321221	-1.63836	0.00209522	Down	Steap2
XM_017595545.1	0.321755	-1.63597	0.000625028	Down	Gramd1b
XM_006236833.3	0.321989	-1.63492	0.000623957	Down	Aak1
XM_006229670.3	0.322092	-1.63445	0.00781037	Down	Picalm
XM_006252451.3	0.322703	-1.63172	0.0016343	Down	Cldn10
XM_006232934.3	0.322958	-1.63058	0.0214609	Down	LOC100363361
XM_017595126.1	0.323043	-1.6302	0.00970017	Down	Asic1
XM_017592162.1	0.323297	-1.62907	0.00887749	Down	Ubr3
NM_017107.2	0.323387	-1.62867	0.000425041	Down	Ogt
XM_017601026.1	0.323424	-1.6285	0.0067445	Down	Ppp2r2b
XM_006239846.3	0.323562	-1.62788	0.0386422	Down	Ncoa1
XM_008764951.2	0.323734	-1.62712	0.00425031	Down	Mta1
XM_017594737.1	0.323911	-1.62633	0.0151049	Down	Mgat4c
NM_001107266.1	0.324072	-1.62561	0.00869897	Down	Ift88
NM_012607.2	0.324082	-1.62557	0.000239271	Down	Nefh
XM_017596490.1	0.324203	-1.62503	0.022323	Down	Agap1
XM_017593593.1	0.324532	-1.62357	0.0117138	Down	Fbxo44
XM_006228857.2	0.324579	-1.62336	0.00141826	Down	Lsm14a
NM_001197907.1	0.324645	-1.62306	0.000576415	Down	Oxr1
XM_006257432.3	0.324892	-1.62197	0.0469292	Down	Agtr2
XM_017598690.1	0.325072	-1.62117	0.00812336	Down	Thsd7b
XM_006234472.3	0.325661	-1.61856	0.00298903	Down	Lrrc55
XM_006243305.3	0.325809	-1.6179	0.0305329	Down	Snx22
XM_017592323.1	0.326016	-1.61698	0.0330418	Down	LOC108350550
XM_006247390.3	0.32628	-1.61582	0.0411885	Down	Krt26
XM_006241616.2	0.32644	-1.61511	0.00189788	Down	Sybu
XM_017599079.1	0.326833	-1.61337	0.0425284	Down	Mapk10
XM_017598033.1	0.326903	-1.61307	0.00229158	Down	Tango2
NM_001122644.1	0.327413	-1.61081	0.000809984	Down	Galnt9
XM_006244279.3	0.327476	-1.61054	0.0226197	Down	LOC100360856
NM_001106816.1	0.327788	-1.60916	0.00466021	Down	Abcg4
XM_006230186.3	0.327859	-1.60885	0.0017163	Down	Slc5a11
XM_017592514.1	0.32811	-1.60775	0.00214131	Down	Srpk2
XM_008773209.2	0.328142	-1.60761	0.00102255	Down	Reps2
XM_017596975.1	0.328423	-1.60637	0.000863053	Down	Fgf11
XM_006228967.3	0.328562	-1.60576	0.000472214	Down	Kcnc3
XM_008769315.2	0.328565	-1.60575	0.000842264	Down	Svop
XM_017600853.1	0.328664	-1.60531	0.00403549	Down	Myo5b
NM_001014163.1	0.328912	-1.60423	0.000486636	Down	Cend1
XM_006249558.3	0.329472	-1.60177	0.0397703	Down	Ep400
XM_006246744.3	0.329644	-1.60102	0.0181297	Down	Sat2
NM_182822.3	0.329682	-1.60085	0.000946287	Down	Tmem255a
XM_017599439.1	0.329701	-1.60077	0.00328358	Down	RGD1311575
XM_017600796.1	0.329857	-1.60009	0.0404124	Down	Etl4
XM_017591471.1	0.329861	-1.60007	0.0387089	Down	Slc25a25
XM_017598176.1	0.330479	-1.59737	0.022064	Down	Tmem44
XM_006245896.2	0.33079	-1.59601	0.0325132	Down	Caskin1
NM_001276762.1	0.330915	-1.59547	0.0482764	Down	Epm2a
XM_017601331.1	0.331065	-1.59482	0.021744	Down	Rnaseh2a
XM_017594047.1	0.331665	-1.5922	0.0436797	Down	Khk
XM_017598739.1	0.331769	-1.59175	0.0361875	Down	Rps6kc1
NM_153305.1	0.331775	-1.59172	0.00232774	Down	Fzd9
XM_017599396.1	0.332055	-1.59051	0.000168896	Down	Slc4a4
XM_017591900.1	0.332293	-1.58947	0.0169441	Down	Prr5l
XM_006231994.2	0.332335	-1.58929	0.00255601	Down	Ttc33
XM_008770645.1	0.3325	-1.58857	0.000755859	Down	LOC103690082
XM_017597408.1	0.332904	-1.58682	0.00707829	Down	Cdc27
NM_001081972.1	0.332957	-1.58659	0.000968479	Down	Klc1
NM_031117.2	0.333003	-1.58639	0.0043041	Down	Snrpn
NM_019281.2	0.333023	-1.58631	0.00835901	Down	Gjd2
NM_001037193.1	0.333121	-1.58588	0.0466158	Down	Acd
XM_006229666.2	0.333164	-1.5857	0.00512938	Down	Me3
NM_001109239.1	0.333178	-1.58564	0.0192519	Down	RGD1560028
XM_017589552.1	0.333453	-1.58445	0.0177079	Down	Smim17
NM_001012116.1	0.333455	-1.58444	0.0109756	Down	Spag1
XM_017591937.1	0.3335	-1.58424	0.00105047	Down	Ptprt
XM_017598466.1	0.333531	-1.58411	0.00202466	Down	LOC302022
NM_001108398.1	0.333645	-1.58362	0.000565207	Down	Hapln4
XM_006251155.3	0.334224	-1.58111	0.00526803	Down	Inpp5j
XM_006246721.3	0.334453	-1.58012	0.0141327	Down	Mink1
XM_006231277.3	0.334726	-1.57895	0.0111387	Down	Pank1
XM_017590727.1	0.334843	-1.57844	0.00473629	Down	Ralyl
XM_017596315.1	0.334971	-1.57789	0.00646413	Down	Ptprm
XM_017590979.1	0.335327	-1.57636	0.0107522	Down	Ndst4
XM_017598407.1	0.335435	-1.57589	0.00959498	Down	Caln1
XM_006250525.3	0.335449	-1.57584	0.00225911	Down	Evi5
XM_017592959.1	0.335579	-1.57527	0.0024047	Down	Cadps2
XM_008772413.2	0.335997	-1.57348	0.00113322	Down	Nkd1
XM_008767089.2	0.336039	-1.5733	0.000456598	Down	Adam23
NM_001191804.1	0.336082	-1.57312	0.0015512	Down	Tmem151b
NM_080409.1	0.336305	-1.57216	0.00856527	Down	Ppfia4
XM_006241436.3	0.336466	-1.57147	0.032509	Down	Slc16a7
NM_012813.2	0.336547	-1.57112	0.00357829	Down	St8sia1
XM_006228452.3	0.336931	-1.56947	0.00199223	Down	Mypop
XM_006250289.3	0.337067	-1.56889	0.00478052	Down	Igsf8
XM_017600373.1	0.33711	-1.56871	0.0113322	Down	Smim18
XM_006236066.3	0.337179	-1.56841	0.00120869	Down	Ppp1r9a
NM_031672.2	0.337277	-1.56799	0.000528507	Down	Slc15a2
XM_008763893.2	0.33739	-1.56751	0.00339453	Down	Elavl4
XM_017591757.1	0.337727	-1.56607	0.0284574	Down	Pak7
NM_001109017.1	0.337777	-1.56586	0.00988499	Down	Zfx
XM_017588825.1	0.337834	-1.56561	0.00815356	Down	Tle4
XM_008768291.2	0.337848	-1.56555	0.00751633	Down	Arhgap27
NM_001271081.1	0.338364	-1.56335	0.000639601	Down	Lrrc4b
XM_002729287.4	0.338556	-1.56254	0.00366688	Down	Cped1
NM_001271385.1	0.338868	-1.5612	0.00534641	Down	Prmt8
NM_001024234.1	0.338926	-1.56096	0.00188171	Down	Wscd1
NM_001033672.1	0.339098	-1.56023	0.0257912	Down	Bcl2l1
NM_138506.1	0.339329	-1.55924	0.00777371	Down	Adra2c
XM_006251205.3	0.339591	-1.55813	0.0204129	Down	Rhbdd3
XM_003749494.4	0.339689	-1.55771	0.000972166	Down	Ccdc141
XM_232840.9	0.33974	-1.55749	0.00778977	Down	Klhl32
XM_006230842.3	0.340011	-1.55635	0.00490031	Down	Ankrd13d
NM_001271199.1	0.340179	-1.55564	0.00143113	Down	Fhl1
NM_001109492.1	0.340404	-1.55468	0.00248279	Down	B3galt2
XM_008764917.1	0.340499	-1.55428	0.0300816	Down	Dlk1
XM_006242658.3	0.340797	-1.55302	0.00508968	Down	Dock6
NM_001106015.1	0.34086	-1.55275	0.00633993	Down	Pla2g3
NM_001109896.1	0.340988	-1.55221	0.000638497	Down	Fgfr2
XM_008770792.2	0.340999	-1.55216	0.00292087	Down	Sacs
NM_001100172.1	0.341075	-1.55184	0.00343947	Down	Kctd8
NM_001109174.1	0.341233	-1.55117	0.0220906	Down	Ankrd34b
XM_006239660.3	0.341254	-1.55108	0.00090937	Down	Slc8a1
XM_017593151.1	0.341301	-1.55089	0.00142701	Down	Cnr1
NM_001107262.1	0.341646	-1.54943	0.0265093	Down	Sall2
XM_017595622.1	0.341925	-1.54825	0.0498707	Down	C1qtnf5
XM_017596715.1	0.341945	-1.54816	0.00307322	Down	LOC108351885
NM_031663.2	0.342253	-1.54687	0.000939249	Down	Slc18a3
XM_341223.8	0.34233	-1.54654	0.00762346	Down	Sel1l3
XM_017593949.1	0.342774	-1.54467	0.000835439	Down	Ptprd
NM_001108226.1	0.34282	-1.54448	0.0489214	Down	Wnt6
XM_006240701.3	0.342847	-1.54436	0.0021225	Down	Tmem196
XM_017600494.1	0.343033	-1.54358	0.00582194	Down	Nmt2
XM_003749451.4	0.343076	-1.5434	0.00889227	Down	Pip5kl1
XM_017596515.1	0.343163	-1.54304	0.0018281	Down	Tmeff2
XM_017592504.1	0.343236	-1.54273	0.00132069	Down	Dpp6
XM_006242666.1	0.343332	-1.54232	0.0457534	Down	Zfp426
XM_017592134.1	0.344072	-1.53922	0.042288	Down	Cntrl
NM_001271109.1	0.344166	-1.53882	0.0036438	Down	Maged2
XM_017596115.1	0.344371	-1.53797	0.00845348	Down	LOC501033
XM_006247238.3	0.344535	-1.53728	0.00108889	Down	Nfe2l1
NM_001127299.1	0.345019	-1.53525	0.0265725	Down	Fam84a
NM_053462.2	0.345107	-1.53488	0.00539913	Down	Nfs1
XM_017596998.1	0.345171	-1.53462	0.0213307	Down	Myh11
XM_006235994.3	0.345592	-1.53286	0.00110103	Down	Abcb1a
NM_033352.1	0.346086	-1.5308	0.00103246	Down	Abcd2
NM_001111366.1	0.346702	-1.52823	0.0251406	Down	Afmid
NM_001271091.1	0.346815	-1.52776	0.00493056	Down	Ndrg4
XM_017595131.1	0.347199	-1.52617	0.0152704	Down	Cirbp
XM_017602345.1	0.347464	-1.52506	0.0178849	Down	Zfp711
NM_022499.2	0.348216	-1.52194	0.0016498	Down	Pvalb
XM_017591404.1	0.348244	-1.52183	0.00145922	Down	NEWGENE_1310139
XM_017591575.1	0.349069	-1.51841	0.0477146	Down	Pak6
NM_182842.1	0.349091	-1.51832	0.00865634	Down	Camk1g
NM_134455.1	0.349095	-1.51831	0.00133468	Down	Cx3cl1
XM_008759440.2	0.349321	-1.51738	0.0288873	Down	LOC102546648
XM_008770790.2	0.349689	-1.51586	0.0220937	Down	Atp8a2
XM_017599428.1	0.350377	-1.51302	0.0231006	Down	Rasgef1b
XM_006246222.3	0.350691	-1.51173	0.00122704	Down	Acsl6
NM_001105874.2	0.350882	-1.51094	0.00465343	Down	Mylk
XM_006250571.3	0.350935	-1.51072	0.000795549	Down	Cplx1
XM_343571.8	0.351043	-1.51028	0.00178862	Down	Rftn2
NM_001107451.1	0.351117	-1.50998	0.0148912	Down	Slc2a12
XM_008765601.2	0.351125	-1.50994	0.033125	Down	Fam135b
NM_012832.3	0.351252	-1.50942	0.0249968	Down	Chrna7
XM_006249709.3	0.351483	-1.50847	0.00981363	Down	Pfkfb2
NM_001106930.1	0.351511	-1.50836	0.0300064	Down	Efcab1
XM_008762288.2	0.351893	-1.50679	0.0263385	Down	Ralgapa2
XM_006247107.3	0.352155	-1.50572	0.00319089	Down	Cltc
NM_001047108.1	0.352156	-1.50571	0.0425638	Down	Lbx1
XM_006236882.3	0.352228	-1.50542	0.0116896	Down	Klf15
XM_008770200.2	0.352323	-1.50503	0.0098061	Down	Ldb2
XM_008759170.2	0.35249	-1.50435	0.000355169	Down	Lgi4
XM_006241983.3	0.35257	-1.50402	0.00165104	Down	Kctd17
NM_001191879.3	0.353084	-1.50191	0.00349192	Down	Scrib
XM_006241671.2	0.353338	-1.50088	0.0246977	Down	Nsmce2
XM_008770195.1	0.353488	-1.50027	0.00604567	Down	Rab28
NM_001106539.1	0.353579	-1.49989	0.0139002	Down	Matn4
NM_001106947.1	0.353825	-1.49889	0.0021539	Down	Slitrk4
XM_017593428.1	0.353885	-1.49865	0.0466306	Down	Prdm2
XM_017600963.1	0.353989	-1.49822	0.0182659	Down	Jakmip2
NM_001108223.1	0.354214	-1.49731	0.00240832	Down	Shd
XM_006255035.3	0.354239	-1.49721	0.0179806	Down	Neto1
NM_013225.1	0.354242	-1.49719	0.0035346	Down	Cntn6
XM_017595999.1	0.354283	-1.49702	0.00639421	Down	Arhgap32
XM_017596788.1	0.354561	-1.49589	0.00317218	Down	Arhgef4
NM_001009665.1	0.35467	-1.49545	0.00227425	Down	Ebag9
NM_130403.1	0.354672	-1.49544	0.00159625	Down	Ppp1r14a
XM_222147.9	0.354714	-1.49527	0.00423152	Down	Glt1d1
XM_006236667.3	0.354866	-1.49466	0.0472962	Down	Elmod3
XM_003751998.4	0.354889	-1.49456	0.00591003	Down	LOC100909913
NM_023962.2	0.355062	-1.49386	0.0208176	Down	Pdgfd
XM_008768272.2	0.355222	-1.49321	0.00344514	Down	Mapt
NM_001302211.1	0.355235	-1.49315	0.0184914	Down	Adgrl2
XM_006252466.2	0.355413	-1.49243	0.00535653	Down	Dzip1
XM_008761020.2	0.355668	-1.4914	0.0132959	Down	LOC103691556
NM_001007658.1	0.355725	-1.49117	0.00167613	Down	Them6
NM_001301736.1	0.355784	-1.49093	0.0101775	Down	Tpm1
XM_008767931.1	0.355849	-1.49066	0.0163237	Down	Mpp3
XM_008762633.2	0.356038	-1.4899	0.0067803	Down	Chpf2
XM_006236490.1	0.356086	-1.4897	0.00154564	Down	Snx10
XM_017602425.1	0.356193	-1.48927	0.0105295	Down	Aff2
XM_006251768.3	0.35633	-1.48872	0.0277044	Down	Abhd6
NM_001142962.1	0.356397	-1.48844	0.027526	Down	Zfp458
XM_017595796.1	0.356592	-1.48765	0.00197701	Down	Map4
XM_017592647.1	0.35697	-1.48612	0.029417	Down	2018-03-08
XM_006237046.3	0.357127	-1.48549	0.0259941	Down	Rpusd3
NM_001100704.1	0.357335	-1.48465	0.0029787	Down	Extl2
XM_008773419.2	0.35753	-1.48386	0.00957071	Down	Rnf128
NM_133308.2	0.357545	-1.48381	0.0148251	Down	Grin3b
NM_012572.1	0.357576	-1.48368	0.0121405	Down	Grik4
NM_001108838.1	0.35767	-1.4833	0.00716314	Down	C1ql1
XM_006257016.3	0.357749	-1.48298	0.00229758	Down	Pcyt1b
XM_008772166.2	0.358182	-1.48123	0.00429849	Down	Mapk4
XM_017595946.1	0.358298	-1.48077	0.0385468	Down	Pik3cb
XM_008767507.2	0.358372	-1.48047	0.00654731	Down	Clec16a
XM_017590322.1	0.358994	-1.47797	0.000848085	Down	Prune2
XM_017592706.1	0.359016	-1.47788	0.0376903	Down	Gpr162
NM_001008555.1	0.359378	-1.47643	0.00441451	Down	Slc10a4
NM_001109294.1	0.359577	-1.47563	0.0345663	Down	Tmem266
NM_173105.1	0.359657	-1.47531	0.00790427	Down	Aqp11
NM_001037096.1	0.359779	-1.47482	0.00151593	Down	Rassf2
NM_001009716.1	0.359783	-1.4748	0.00843361	Down	Asphd2
XM_017592337.1	0.359943	-1.47416	0.00773094	Down	Ano3
XM_006234173.3	0.360169	-1.47325	0.0186449	Down	Cacnb4
NM_012665.1	0.360238	-1.47298	0.00128881	Down	Syt2
XM_017591642.1	0.360457	-1.4721	0.00566519	Down	Vav2
NM_022626.2	0.360515	-1.47187	0.00979753	Down	Phka1
XM_003750790.4	0.360851	-1.47052	0.0404247	Down	Haghl
XM_017598362.1	0.360924	-1.47023	0.044334	Down	Gtf2i
NM_001271227.1	0.3613	-1.46873	0.00554658	Down	Tfe3
NM_001105871.1	0.361332	-1.4686	0.0258063	Down	Hrasls
XM_017596877.1	0.36146	-1.46809	0.019412	Down	LOC102552880
NM_001025134.1	0.361462	-1.46808	0.0179144	Down	Uqcrq
NM_019266.2	0.361586	-1.46759	0.00121285	Down	Scn8a
XM_017601330.1	0.361745	-1.46696	0.047443	Down	Sipa1l2
NM_001191894.1	0.36181	-1.4667	0.00413382	Down	Stk32a
XM_017593666.1	0.362188	-1.46519	0.00149025	Down	Fbxo2
NM_001108107.2	0.362249	-1.46495	0.0227601	Down	Pdzrn4
NM_001106470.1	0.36225	-1.46494	0.0390106	Down	Mettl14
XM_017593099.1	0.362254	-1.46493	0.00855417	Down	LOC103692025
XM_008761170.2	0.362292	-1.46477	0.023782	Down	Trim46
XM_006236003.3	0.362437	-1.4642	0.0314938	Down	Rundc3b
XM_017601376.1	0.362446	-1.46416	0.00580027	Down	Cdh8
XM_006231141.3	0.36267	-1.46327	0.00486548	Down	Fam120b
XM_017602085.1	0.362697	-1.46316	0.0179568	Down	Nhs
XM_008761658.1	0.362901	-1.46235	0.0436549	Down	Kyat1
NM_001008380.1	0.362983	-1.46203	0.0114521	Down	Dis3l
XM_008761673.2	0.363029	-1.46184	0.00117701	Down	Sptan1
XM_006249099.3	0.363393	-1.4604	0.00474647	Down	Hip1
XM_017601171.1	0.363442	-1.4602	0.0436025	Down	Slc9a5
XM_006230335.3	0.36348	-1.46005	0.0367936	Down	Doc2a
NM_022710.1	0.363569	-1.4597	0.00454369	Down	Pde1b
XM_017594757.1	0.363906	-1.45836	0.0173037	Down	Tbc1d31
XM_008764961.2	0.364477	-1.4561	0.00209837	Down	Ppp2r5c
XM_006250980.2	0.364661	-1.45537	0.0228898	Down	Atp8a1
XM_017592255.1	0.364818	-1.45475	0.0213865	Down	Cep250
NM_012612.2	0.364819	-1.45475	0.0251741	Down	Nppa
NM_001024339.1	0.364981	-1.45411	0.0157119	Down	Tuba8
XM_017597736.1	0.36506	-1.4538	0.0381797	Down	Rab37
NM_001109900.1	0.36526	-1.453	0.0344953	Down	Akr1cl
NM_053392.1	0.365285	-1.45291	0.00240906	Down	Cdh11
XM_006234833.2	0.365311	-1.4528	0.00177201	Down	Ttbk2
XM_006238350.3	0.365383	-1.45252	0.0191028	Down	Ttc39b
NM_013090.2	0.365548	-1.45187	0.00121545	Down	Vamp1
XM_008762793.2	0.365731	-1.45114	0.00355216	Down	Impdh1
XM_008773576.2	0.36599	-1.45012	0.00943483	Down	Mcf2
NM_001127602.1	0.366043	-1.44991	0.024089	Down	Slc25a53
XM_008764775.1	0.366089	-1.44973	0.0288372	Down	Plekhh1
XM_017594521.1	0.366157	-1.44946	0.000860756	Down	Ahnak2
NM_022624.1	0.366265	-1.44904	0.00238038	Down	Slc22a23
XM_017595374.1	0.366357	-1.44868	0.00653138	Down	LOC100911848
NM_013131.1	0.366603	-1.44771	0.00303092	Down	Nr3c2
NM_019304.1	0.366958	-1.44631	0.00550057	Down	Dgkb
XM_017593571.1	0.36702	-1.44607	0.00321431	Down	Ankrd6
NM_001134632.1	0.367032	-1.44602	0.00408288	Down	Ppp4r4
NM_019176.2	0.367074	-1.44586	0.00649709	Down	Stmn4
NM_001106453.1	0.367098	-1.44576	0.0242246	Down	Trim45
XM_008764134.2	0.3671	-1.44576	0.0195546	Down	Wdtc1
XM_006256338.3	0.367135	-1.44562	0.00169002	Down	Susd2
XM_017595617.1	0.367282	-1.44504	0.0462852	Down	Kirrel3
NM_001106494.1	0.367345	-1.44479	0.00300243	Down	Lpcat4
XM_006251382.3	0.367353	-1.44476	0.00207481	Down	Gal3st1
XM_017600441.1	0.367514	-1.44413	0.010074	Down	Cplx2
XM_017595562.1	0.367558	-1.44396	0.00550951	Down	Lrrc49
NM_001191921.1	0.36781	-1.44297	0.0275207	Down	Zfp286a
NM_001108727.1	0.368012	-1.44218	0.00726612	Down	Coq10a
NM_001014149.1	0.368096	-1.44184	0.00191667	Down	Rell2
NM_001136151.1	0.368103	-1.44182	0.0477104	Down	Nrg2
NM_001191631.1	0.36818	-1.44152	0.0180645	Down	Plpp4
XM_017596964.1	0.368466	-1.4404	0.0224672	Down	Kcnj12
XM_017596286.1	0.368526	-1.44016	0.0177138	Down	Pam
NM_001191681.1	0.368539	-1.44011	0.00135463	Down	Nat8l
XM_008763014.2	0.368607	-1.43985	0.00833971	Down	Ndnf
XM_017595136.1	0.36866	-1.43964	0.0027507	Down	Kcnk9
XM_006253655.3	0.368951	-1.4385	0.00555992	Down	Dbn1
XM_006234097.3	0.369064	-1.43806	0.0416158	Down	Golga1
XM_008765797.2	0.369094	-1.43794	0.00249801	Down	Nell2
XM_006248581.3	0.369479	-1.43644	0.00502317	Down	Eif4g1
XM_017599390.1	0.36954	-1.4362	0.0107338	Down	Ppargc1a
NM_001012347.1	0.369999	-1.43441	0.00633459	Down	Rgs7bp
XM_574179.7	0.370035	-1.43427	0.0266262	Down	Fam69c
NM_017357.1	0.370081	-1.43409	0.0334991	Down	Hpcal4
NM_001025122.2	0.370091	-1.43405	0.00803628	Down	Cyhr1
XM_006246904.3	0.370133	-1.43389	0.00209868	Down	Rab11fip4
XM_008772405.2	0.370158	-1.43379	0.00293113	Down	Gpt2
NM_001108215.1	0.370194	-1.43365	0.019986	Down	Mfsd9
XM_006228185.3	0.370449	-1.43265	0.0112375	Down	Usp29
XM_006233140.2	0.370453	-1.43264	0.0131541	Down	Amigo1
XM_006235798.2	0.370749	-1.43149	0.0458216	Down	Samd10
XM_234923.9	0.370924	-1.4308	0.00450129	Down	Zfr2
XM_017599906.1	0.371046	-1.43033	0.0410687	Down	LOC108348161
NM_001191794.1	0.371314	-1.42929	0.0167759	Down	Cln6
NM_001007004.1	0.371406	-1.42893	0.00110841	Down	Tuba4a
NM_133534.1	0.371503	-1.42855	0.00608255	Down	Cx3cr1
XM_006249686.3	0.372037	-1.42648	0.00679167	Down	Ccnt2
XM_006249383.3	0.372179	-1.42593	0.0124303	Down	Rita1
NM_012673.2	0.372191	-1.42589	0.00161813	Down	Thy1
XM_017595062.1	0.37221	-1.42581	0.0035207	Down	Ccdc184
XM_006244570.3	0.37229	-1.4255	0.0289638	Down	Ppp2r5d
XM_006228843.3	0.372459	-1.42485	0.0260928	Down	Fxyd7
NM_031610.3	0.372616	-1.42424	0.00735269	Down	Kcnj3
NM_001106331.1	0.372789	-1.42357	0.0163546	Down	Trpt1
NM_021655.2	0.373028	-1.42265	0.00179964	Down	Chga
XM_008766975.2	0.373108	-1.42233	0.027406	Down	Fam168b
NM_001126085.1	0.373201	-1.42198	0.026155	Down	Lsm6
NM_012543.3	0.373358	-1.42137	0.00402955	Down	Dbp
XM_017595490.1	0.373418	-1.42114	0.0114125	Down	Elavl3
XM_008763575.2	0.373471	-1.42093	0.00604118	Down	Asph
XM_008770005.2	0.373493	-1.42085	0.00540064	Down	Klhl8
XM_002727914.5	0.373679	-1.42013	0.0471521	Down	Ypel1
XM_574979.6	0.373854	-1.41945	0.0127901	Down	Efna3
NM_184051.1	0.373989	-1.41893	0.00556161	Down	Prkag2
XM_006238188.2	0.374254	-1.41791	0.01609	Down	Tmem245
XM_006250387.1	0.374585	-1.41664	0.00423263	Down	Adck3
XM_008764198.2	0.374695	-1.41621	0.0422967	Down	Rere
NM_001107283.1	0.374739	-1.41604	0.00305179	Down	Slitrk1
XM_006235441.3	0.374755	-1.41598	0.00261815	Down	Slc32a1
NM_001013181.1	0.374914	-1.41537	0.0253257	Down	Zbtb16
NM_173307.1	0.374982	-1.41511	0.010238	Down	Abca5
XM_006232640.3	0.37504	-1.41488	0.0229054	Down	Sema4a
XM_006252636.3	0.375638	-1.41258	0.00903481	Down	Il17rd
NM_001008296.1	0.375719	-1.41228	0.013607	Down	Emc9
XM_006256312.3	0.37584	-1.41181	0.0450464	Down	Pcnt
XM_017600104.1	0.37593	-1.41146	0.0388604	Down	Spock3
NM_022265.2	0.376323	-1.40996	0.000628702	Down	Pdcd4
NM_001329156.1	0.376397	-1.40967	0.0189008	Down	Tceal5
NM_001107395.1	0.376576	-1.40899	0.00233945	Down	Psd2
NM_001108237.2	0.376665	-1.40865	0.00805861	Down	Lama1
XM_008771359.2	0.376743	-1.40835	0.00780544	Down	Ank1
NM_001109127.1	0.376755	-1.4083	0.00630017	Down	Cbln1
XM_006245871.3	0.376998	-1.40737	0.0205488	Down	Paqr4
XM_006255023.3	0.377214	-1.40655	0.00679324	Down	Cbln2
NM_022862.1	0.377847	-1.40413	0.0315294	Down	Unc13b
XM_017599707.1	0.37808	-1.40324	0.0048814	Down	Lcp1
XM_008759531.2	0.378264	-1.40254	0.0366708	Down	Hddc3
NM_001107515.1	0.378269	-1.40251	0.00393447	Down	Hebp2
NM_001173557.1	0.378444	-1.40185	0.018339	Down	RGD1311756
XM_006255453.3	0.378601	-1.40125	0.015856	Down	Hsf4
NM_001025734.1	0.378703	-1.40086	0.0102601	Down	Tada3
NM_001034926.1	0.378817	-1.40043	0.0239162	Down	Lrrc40
XM_008764855.2	0.378915	-1.40005	0.00660434	Down	Evl
NM_001012738.1	0.379102	-1.39934	0.00224213	Down	Ckmt1b
XM_017598433.1	0.37917	-1.39908	0.0144448	Down	Mtus2
NM_001014183.1	0.379435	-1.39807	0.00261559	Down	Lamp5
XM_017589793.1	0.379473	-1.39793	0.00494751	Down	Slc17a6
NM_172085.2	0.379642	-1.39729	0.00801527	Down	Pou3f2
NM_001277069.1	0.379683	-1.39713	0.00625797	Down	Ric3
XM_006243503.3	0.379815	-1.39663	0.00190826	Down	Dopey1
XM_017591360.1	0.379968	-1.39605	0.00360538	Down	Erich3
XM_008768603.1	0.37999	-1.39597	0.0385833	Down	Atp5j
XM_006232506.2	0.379994	-1.39595	0.00216454	Down	Glrb
NM_012952.1	0.379997	-1.39594	0.0111058	Down	Fgf9
XM_006245234.3	0.380001	-1.39593	0.00497822	Down	Sphkap
XM_008769640.2	0.380132	-1.39543	0.0220818	Down	Astn1
NM_053835.1	0.380173	-1.39527	0.00358861	Down	Cltb
XM_017593399.1	0.380651	-1.39346	0.00767876	Down	Nt5c1a
XM_006247153.3	0.380788	-1.39294	0.0328309	Down	Spag9
XM_006246127.2	0.380823	-1.39281	0.00414434	Down	Gabrb2
NM_001190372.1	0.380939	-1.39237	0.00422088	Down	Ankrd29
XM_003749301.4	0.380982	-1.3922	0.0456788	Down	RGD1563962
NM_013219.1	0.381079	-1.39184	0.00235798	Down	Cadps
NM_001108775.1	0.381234	-1.39125	0.0167213	Down	Rab6b
XM_006236072.2	0.381257	-1.39117	0.0258503	Down	Mterf1
NM_031743.2	0.381454	-1.39042	0.00222924	Down	Slc24a2
XM_006239349.3	0.381478	-1.39033	0.0166173	Down	Vps13d
NM_001007730.2	0.381817	-1.38905	0.00226994	Down	Cabp7
XM_006231068.3	0.381931	-1.38862	0.00541889	Down	Syt7
NM_001039325.1	0.381982	-1.38842	0.0155007	Down	Zdhhc22
XM_006236160.2	0.382097	-1.38799	0.0150167	Down	Pot1
XM_008769634.2	0.382201	-1.3876	0.0465374	Down	Fam20b
XM_017599700.1	0.382484	-1.38653	0.0051009	Down	Rhobtb2
XM_017601920.1	0.382647	-1.38592	0.00280882	Down	Htr2c
XM_017589576.1	0.38279	-1.38538	0.00616306	Down	Flrt1
NM_001029923.1	0.382936	-1.38483	0.0244205	Down	Oscp1
XM_008773625.2	0.383222	-1.38375	0.0176462	Down	Atp2b3
XM_008770048.2	0.383251	-1.38364	0.0213455	Down	Rufy3
XM_017588821.1	0.383257	-1.38362	0.00362192	Down	Kcnc1
XM_008768612.2	0.383323	-1.38337	0.0283928	Down	Hlcs
XM_017595413.1	0.38348	-1.38278	0.0231435	Down	Opcml
XM_017600025.1	0.383821	-1.38149	0.00418401	Down	Chat
XM_006243737.3	0.383858	-1.38135	0.00841132	Down	Cacna2d2
NM_032083.1	0.383954	-1.38099	0.00355025	Down	Chn1
NM_001271046.2	0.384036	-1.38069	0.00263828	Down	Scn1b
NM_134401.2	0.384103	-1.38043	0.00531011	Down	Crtac1
XM_017601301.1	0.384195	-1.38009	0.00216311	Down	RGD1304884
XM_017592227.1	0.384319	-1.37962	0.00750509	Down	Dzank1
XM_340760.7	0.38434	-1.37955	0.00220091	Down	Flywch1
XM_006232777.3	0.38454	-1.37879	0.0191311	Down	Adar
XM_017589080.1	0.38499	-1.37711	0.00218388	Down	Hspa12a
NM_001108969.1	0.385294	-1.37597	0.0130804	Down	Clvs1
XM_006253127.1	0.385296	-1.37596	0.00388755	Down	Acsl1
NM_001191110.1	0.385369	-1.37569	0.00369484	Down	Celsr2
XM_017593503.1	0.385441	-1.37542	0.00422176	Down	Macf1
NM_001004256.1	0.385624	-1.37473	0.00670848	Down	Sirt5
NM_001271055.1	0.38571	-1.37441	0.00254896	Down	Tmem59l
NM_012573.3	0.38572	-1.37437	0.0136032	Down	Grin2a
NM_001108987.1	0.385892	-1.37373	0.00637022	Down	Diras1
NM_024346.1	0.386021	-1.37325	0.00252404	Down	Stmn3
NM_030993.1	0.386026	-1.37323	0.0437795	Down	Ddn
NM_021746.1	0.386057	-1.37311	0.0152597	Down	Mapk12
XM_017592124.1	0.386178	-1.37266	0.0428261	Down	Ralgps1
XM_006240353.3	0.386574	-1.37118	0.0160325	Down	Syndig1l
NM_001130569.1	0.386694	-1.37073	0.00508427	Down	Mpped1
NM_001025755.1	0.386711	-1.37067	0.0422263	Down	MGC116197
NM_022847.1	0.386852	-1.37014	0.0280174	Down	Pgr
XM_017597692.1	0.387002	-1.36959	0.0070721	Down	Car10
NM_019160.2	0.387091	-1.36926	0.00659603	Down	Uts2
NM_032078.2	0.387097	-1.36923	0.00359786	Down	Ryr2
NM_030856.1	0.387173	-1.36895	0.00494415	Down	Lrrn3
XM_003750087.4	0.387243	-1.36869	0.0277767	Down	Disp3
NM_001106918.1	0.38726	-1.36863	0.0237691	Down	Fsd1
XM_001080220.6	0.387504	-1.36772	0.031013	Down	Fam124a
XM_017588729.1	0.387602	-1.36735	0.00264901	Down	Slc6a5
NM_021758.1	0.387743	-1.36683	0.0118436	Down	Lin7b
XM_017599795.1	0.387924	-1.36615	0.00466444	Down	Fgf14
NM_001107064.1	0.387993	-1.3659	0.00751224	Down	Fads6
XM_017598776.1	0.388155	-1.3653	0.0174776	Down	Cntnap5c
NM_001113185.1	0.38824	-1.36498	0.00360602	Down	Gria4
NM_001109058.1	0.388284	-1.36482	0.0146415	Down	LOC498122
NM_001130508.1	0.388313	-1.36471	0.0482182	Down	Scx
XM_017602023.1	0.388694	-1.36329	0.0170924	Down	Plxna3
NM_031016.1	0.388875	-1.36262	0.00505407	Down	Chrm2
XM_017599639.1	0.389007	-1.36213	0.00925616	Down	Klhl1
XM_006255957.2	0.389302	-1.36104	0.0193719	Down	Ehmt2
XM_006238842.3	0.389916	-1.35877	0.0411439	Down	LOC100294508
NM_001100822.2	0.389928	-1.35872	0.00668392	Down	Flt3
XM_008764186.2	0.389935	-1.35869	0.00566179	Down	Trnp1
XM_006247071.3	0.389996	-1.35847	0.0433949	Down	Dgke
XM_006242791.3	0.390208	-1.35768	0.0202077	Down	Cdon
XM_006242104.2	0.390396	-1.35699	0.0216031	Down	Ttll1
XM_006241327.3	0.390444	-1.35681	0.00589356	Down	Kcnc2
NM_001107252.2	0.390467	-1.35673	0.00464144	Down	Nkiras1
NM_001109454.1	0.39053	-1.35649	0.00613091	Down	Pgm2l1
XM_008767069.1	0.390639	-1.35609	0.029826	Down	Creg2
XM_006242434.3	0.390803	-1.35549	0.0324423	Down	Hoxc9
XM_006254704.3	0.390985	-1.35482	0.0149289	Down	Sema6a
NM_031573.1	0.391028	-1.35466	0.0362098	Down	Phkg1
NM_021750.2	0.391034	-1.35463	0.0227394	Down	Csad
XM_008772676.2	0.391065	-1.35452	0.0447037	Down	Tldc1
XM_006237224.2	0.391125	-1.3543	0.0218699	Down	Erc1
NM_001135016.1	0.39138	-1.35336	0.00854419	Down	Tmem86a
XM_006242329.3	0.391454	-1.35309	0.0154757	Down	Asb8
XM_008767623.2	0.39151	-1.35288	0.0167658	Down	Fam196b
NM_001008342.1	0.392085	-1.35076	0.0156554	Down	Akr1e2
XM_017596913.1	0.392286	-1.35002	0.0180392	Down	Kif1a
NM_013055.1	0.392314	-1.34992	0.00624991	Down	Map3k12
XM_017598104.1	0.392575	-1.34896	0.0119574	Down	Epha6
NM_001107897.1	0.392618	-1.3488	0.00354189	Down	Gdap1
XM_017589654.1	0.392754	-1.3483	0.00913805	Down	Dlg2
NM_001025042.2	0.392774	-1.34823	0.00949089	Down	Fibin
XM_006256088.1	0.392787	-1.34818	0.0420222	Down	Bag6
NM_198752.3	0.392793	-1.34816	0.00415431	Down	Kifc2
NM_133652.1	0.39333	-1.34619	0.00942776	Down	Cspg5
XM_008771083.2	0.393393	-1.34596	0.0112821	Down	Fcho1
NM_001134845.1	0.393514	-1.34551	0.0124999	Down	LOC688613
NM_001033687.1	0.393518	-1.3455	0.0341492	Down	Ushbp1
XM_006241741.3	0.393705	-1.34481	0.00344499	Down	Slc45a4
NM_053508.2	0.393723	-1.34475	0.0419263	Down	Tekt1
XM_008759721.2	0.393814	-1.34442	0.0197843	Down	Fchsd2
XM_017597493.1	0.393891	-1.34413	0.0462462	Down	Kcnab3
NM_080882.1	0.393971	-1.34384	0.00245356	Down	Tubb4a
NM_001100575.1	0.39413	-1.34326	0.0344888	Down	Mpp7
NM_001108697.1	0.394142	-1.34321	0.00854575	Down	Fam213b
XM_017593124.1	0.39446	-1.34205	0.0108267	Down	Sh3gl2
NM_001107219.2	0.394471	-1.34201	0.00453888	Down	Lgi2
XM_006245440.1	0.394573	-1.34163	0.0130065	Down	Hdac4
NM_017303.2	0.394924	-1.34035	0.00292708	Down	Kcnab1
NM_001012205.1	0.395021	-1.34	0.0104842	Down	Dpp10
NM_001100557.1	0.395119	-1.33964	0.00416263	Down	Olig2
XM_017600070.1	0.395174	-1.33944	0.0392548	Down	Cacna1d
XM_006250108.2	0.395204	-1.33933	0.00585632	Down	Rabgap1l
XM_017597855.1	0.39571	-1.33748	0.00408096	Down	Fgf12
NM_001040190.1	0.396136	-1.33593	0.00396	Down	Atcay
NM_022301.1	0.396278	-1.33542	0.00738219	Down	Pi4ka
XM_006238916.2	0.396672	-1.33398	0.00487703	Down	LOC100912566
NM_001270627.1	0.396901	-1.33315	0.00558561	Down	Nsmf
NM_001024982.1	0.397395	-1.33135	0.0220722	Down	Cpne9
NM_001145163.1	0.397516	-1.33092	0.00443544	Down	Ube2ql1
NM_013113.2	0.397611	-1.33057	0.00320002	Down	Atp1b1
XM_006257400.3	0.397611	-1.33057	0.0453837	Down	Racgap1
XM_006254204.3	0.397703	-1.33024	0.025167	Down	Fbxo18
NM_001037789.1	0.397779	-1.32996	0.00745519	Down	Ccdc28a
XM_008770441.2	0.397853	-1.32969	0.00460537	Down	Vstm2a
XM_006256860.3	0.397869	-1.32963	0.00523932	Down	Ap1s2
NM_012508.5	0.397957	-1.32932	0.00327288	Down	Atp2b2
XM_017591990.1	0.398	-1.32916	0.00364244	Down	Napb
XM_006251748.3	0.398016	-1.3291	0.0169493	Down	Bmp4
NM_001015010.1	0.398136	-1.32867	0.00867811	Down	Cib2
NM_001109449.2	0.398252	-1.32825	0.0343293	Down	Glyctk
NM_001271438.1	0.398294	-1.32809	0.00645953	Down	Slc9a9
NM_053465.1	0.398356	-1.32787	0.00719267	Down	Fut9
XM_017599230.1	0.398391	-1.32774	0.0259799	Down	Tmed4
NM_001007628.2	0.398536	-1.32722	0.00741823	Down	Cxxc5
NM_001007020.2	0.39855	-1.32717	0.019581	Down	Hmgn3
NM_001107303.1	0.398618	-1.32692	0.00581629	Down	Arrdc2
XM_017596080.1	0.398657	-1.32678	0.00552596	Down	Tln2
NM_001106989.1	0.398781	-1.32633	0.00458218	Down	Sox8
XM_017591067.1	0.398811	-1.32622	0.0411859	Down	Hapln2
XM_017594350.1	0.399178	-1.3249	0.0280536	Down	Dpysl5
NM_214459.2	0.39929	-1.32449	0.00559225	Down	Phactr3
NM_138835.1	0.399428	-1.32399	0.00879535	Down	Syt12
XM_006233653.3	0.399581	-1.32344	0.0137982	Down	RGD1560470
XM_006252584.3	0.399763	-1.32278	0.00495087	Down	Ogdhl
NM_001128193.2	0.399795	-1.32267	0.0196434	Down	Vps37d
XM_017597744.1	0.399887	-1.32234	0.00364647	Down	Rnf157
XM_006257322.3	0.399966	-1.32205	0.00300041	Down	Prph
NM_001014156.1	0.400266	-1.32097	0.0137015	Down	Dbndd1
XM_006251992.3	0.400287	-1.32089	0.0161796	Down	Sdr39u1
NM_001130546.1	0.400439	-1.32035	0.00370849	Down	Lynx1
XM_008760078.2	0.400447	-1.32032	0.0158611	Down	Cdkn1c
XM_006252664.2	0.400486	-1.32018	0.0493931	Down	Wnt5a
NM_001107046.1	0.400634	-1.31964	0.0212937	Down	Plxdc1
XM_017594530.1	0.400661	-1.31955	0.0247161	Down	Cdkl4
NM_145776.1	0.400735	-1.31928	0.00480719	Down	Slc38a3
XM_017594101.1	0.401041	-1.31818	0.0493125	Down	Esrrb
NM_001047865.1	0.401345	-1.31708	0.0440731	Down	Cntnap5a
XM_017592168.1	0.401517	-1.31647	0.0120316	Down	Fam171b
NM_012994.2	0.401686	-1.31586	0.00720907	Down	Nxph1
NM_001109480.1	0.401717	-1.31575	0.00292806	Down	Tmem229a
XM_006227844.3	0.401876	-1.31518	0.00979794	Down	Plekhg1
XM_006254821.3	0.401991	-1.31477	0.0450607	Down	Fbxo38
XM_006246378.3	0.401999	-1.31474	0.00409977	Down	Glra1
XM_003749475.4	0.402028	-1.31463	0.00353162	Down	Pkp4
NM_175595.2	0.402067	-1.31449	0.00676898	Down	Cacna2d3
NM_001013163.2	0.402218	-1.31395	0.0158954	Down	Bmyc
XM_006257421.1	0.40232	-1.31359	0.0212712	Down	Amot
NM_080696.2	0.402351	-1.31347	0.0413809	Down	Cacng8
XM_017588798.1	0.402355	-1.31346	0.0379946	Down	Stx1b
NM_030991.3	0.402644	-1.31242	0.00380589	Down	Snap25
XM_008772171.2	0.402763	-1.312	0.0046452	Down	Wdr7
NM_001100784.1	0.402924	-1.31142	0.0102026	Down	Gjc2
XM_017589123.1	0.402965	-1.31127	0.00465641	Down	Sptbn4
XM_006228283.2	0.403058	-1.31094	0.00567103	Down	Brsk1
XM_017601227.1	0.403132	-1.31067	0.0161269	Down	Zdhhc1
XM_017597990.1	0.403138	-1.31065	0.0165266	Down	Tnk2
NM_022609.2	0.403312	-1.31003	0.0275069	Down	B3gat2
NM_213610.3	0.403618	-1.30894	0.0281905	Down	RGD1302996
XM_006229163.1	0.403711	-1.30861	0.0111883	Down	Nucb1
NM_001191553.1	0.403739	-1.3085	0.022616	Down	Ccdc85a
XM_006254380.3	0.403749	-1.30847	0.0304034	Down	Mtmr1
XM_008760094.2	0.403818	-1.30822	0.00534185	Down	Sptbn2
XM_006244219.2	0.403881	-1.308	0.0471003	Down	Satb1
NM_012686.2	0.403917	-1.30787	0.00396381	Down	Vsnl1
NM_001034948.1	0.40399	-1.30761	0.0127716	Down	Zfyve19
NM_001271229.1	0.404339	-1.30636	0.0315137	Down	Pstk
XM_006250818.3	0.404565	-1.30555	0.0225436	Down	Epha5
XM_006233452.3	0.404572	-1.30553	0.00663136	Down	Prkacb
NM_001191991.1	0.40459	-1.30547	0.00953582	Down	Fam19a5
NM_001106657.1	0.404639	-1.30529	0.0335247	Down	Zbtb5
NM_001135013.1	0.404745	-1.30491	0.0480508	Down	Ankrd42
XM_006256419.3	0.404973	-1.3041	0.00405866	Down	Spock2
XM_008763370.2	0.405132	-1.30354	0.00472645	Down	Bcat1
NM_001108991.1	0.405234	-1.30317	0.0199196	Down	Trhde
XM_006247568.2	0.405285	-1.30299	0.00601903	Down	Kcnj16
NM_001107094.1	0.405299	-1.30294	0.0124945	Down	Hoxd10
NM_001012075.1	0.405365	-1.30271	0.00418157	Down	Tspyl4
NM_001108792.2	0.405756	-1.30131	0.00709359	Down	Bend6
NM_001007008.1	0.405832	-1.30104	0.00451096	Down	Chchd10
XM_006256637.3	0.405838	-1.30102	0.00614461	Down	Slc9a7
NM_001134615.1	0.405885	-1.30086	0.00651002	Down	Slc7a14
NM_001107985.1	0.405891	-1.30084	0.00716343	Down	Extl1
XM_006247101.3	0.405979	-1.30052	0.0249313	Down	Trim37
XM_017591596.1	0.405985	-1.3005	0.00921293	Down	Snph
NM_001198583.2	0.406031	-1.30034	0.0154085	Down	Grin3a
NM_001009831.2	0.406136	-1.29996	0.00620102	Down	Atl1
NM_013018.2	0.406291	-1.29941	0.00451845	Down	Rab3a
NM_144747.3	0.406311	-1.29934	0.00735808	Down	Slc45a1
XM_001062555.5	0.406608	-1.29829	0.00416921	Down	LOC685152
NM_172321.1	0.406672	-1.29806	0.00523802	Down	Slc6a15
XM_006236818.2	0.406687	-1.29801	0.0495695	Down	Nat8f4
XM_008761779.2	0.406725	-1.29787	0.038441	Down	Slc2a8
XM_008764457.2	0.406812	-1.29757	0.00510959	Down	Prepl
XM_006247687.3	0.406946	-1.29709	0.0349607	Down	Cog1
XM_017601176.1	0.407057	-1.2967	0.033149	Down	Mlnr
NM_024162.1	0.407144	-1.29639	0.0239523	Down	Fabp3
XM_006242068.3	0.40738	-1.29555	0.00732746	Down	Tef
NM_001106296.2	0.4074	-1.29548	0.0081435	Down	Fam57b
NM_001130570.1	0.407513	-1.29508	0.0105535	Down	Scrt1
XM_017590796.1	0.407546	-1.29497	0.00431778	Down	Sv2c
XM_006231768.2	0.407582	-1.29484	0.0312851	Down	Msh3
XM_006257083.3	0.407659	-1.29457	0.011304	Down	Dlg3
XM_017592894.1	0.407676	-1.2945	0.0128317	Down	Dgki
NM_001108024.1	0.407739	-1.29428	0.0110492	Down	Lrfn5
XM_006232140.2	0.407745	-1.29426	0.0169283	Down	Tpd52
NM_001108479.1	0.407813	-1.29402	0.0119499	Down	Vstm2b
XM_006247318.3	0.407882	-1.29378	0.0264348	Down	Ezh1
NM_001025046.1	0.408122	-1.29293	0.0057897	Down	Fam131b
XM_006231215.3	0.408207	-1.29263	0.00582039	Down	Kank1
XM_017602355.1	0.408229	-1.29255	0.00581078	Down	LOC108348137
NM_053938.2	0.408332	-1.29219	0.047446	Down	Cdh3
XM_017602412.1	0.40837	-1.29205	0.0341258	Down	RGD1561327
NM_001012068.1	0.408408	-1.29192	0.048164	Down	Uros
XM_006229753.2	0.408416	-1.29189	0.00931694	Down	Pak1
XM_578417.6	0.408561	-1.29137	0.0380099	Down	Rerg
NM_001009617.1	0.408601	-1.29123	0.00468106	Down	Mest
NM_031242.2	0.408636	-1.29111	0.00590538	Down	Cds1
NM_001134702.1	0.40884	-1.29039	0.0272751	Down	Meis1
NM_001105917.1	0.40886	-1.29032	0.0141189	Down	Actl6b
XM_006245071.2	0.40887	-1.29029	0.0354295	Down	Pikfyve
XM_003750272.4	0.40908	-1.28955	0.0272478	Down	LOC100910577
XM_017597928.1	0.409112	-1.28943	0.00538877	Down	B3galt5
XM_017591356.1	0.409125	-1.28939	0.0041093	Down	Ttll7
XM_017592908.1	0.409215	-1.28907	0.0132023	Down	Grm7
NM_001109260.1	0.409217	-1.28906	0.00648767	Down	RGD1561849
XM_006249545.3	0.409267	-1.28889	0.0413361	Down	Hps4
XM_006239024.3	0.409414	-1.28837	0.0353457	Down	Eya3
XM_006245534.3	0.409457	-1.28822	0.0224738	Down	Atg4b
XM_008766232.2	0.409492	-1.28809	0.0305005	Down	Parp6
NM_133567.2	0.409522	-1.28799	0.00496717	Down	Adap1
NM_001105817.1	0.409549	-1.28789	0.0111839	Down	Sarm1
XM_006251201.3	0.409681	-1.28743	0.0263819	Down	Ewsr1
NM_001100821.1	0.410035	-1.28618	0.0342382	Down	Ccne1
XM_006255548.3	0.410051	-1.28613	0.0236109	Down	Carmil2
XM_017591499.1	0.410089	-1.28599	0.004707	Down	Pygb
XM_017598731.1	0.410133	-1.28584	0.00828633	Down	Susd4
NM_053379.3	0.410291	-1.28528	0.0433858	Down	Dcx
NM_001017480.1	0.410407	-1.28487	0.0169585	Down	Hoxb7
XM_006249380.3	0.410498	-1.28455	0.00581769	Down	Rph3a
XM_006245123.3	0.410571	-1.2843	0.0213361	Down	Vwc2l
XM_006254285.3	0.410816	-1.28344	0.00971811	Down	Slc39a12
NM_053346.1	0.410842	-1.28334	0.00610787	Down	Nrn1
NM_080777.2	0.410896	-1.28316	0.00542778	Down	Sncb
XM_006253462.3	0.410909	-1.28311	0.0376705	Down	Cars2
NM_201562.3	0.411058	-1.28259	0.00692176	Down	Rtn2
XM_006236589.3	0.411168	-1.2822	0.0417402	Down	Gprin3
XM_230487.8	0.411432	-1.28127	0.0380929	Down	Pla2g4e
NM_031730.2	0.411437	-1.28126	0.00650094	Down	Kcnd2
NM_001190998.1	0.41156	-1.28082	0.0433942	Down	Smtnl2
XM_226891.9	0.41157	-1.28079	0.0152038	Down	Dnah5
NM_001107365.1	0.411605	-1.28067	0.0057546	Down	Camk1d
XM_017601558.1	0.411839	-1.27985	0.0237251	Down	Ddr1
XM_006255260.3	0.411934	-1.27951	0.0322218	Down	Sall1
NM_001134750.1	0.411984	-1.27934	0.00635909	Down	Pnkd
NM_053626.1	0.411994	-1.2793	0.0206507	Down	Dao
NM_031529.1	0.412205	-1.27856	0.025942	Down	Rarb
NM_001191113.1	0.412349	-1.27806	0.00717465	Down	Cpne6
XM_017596624.1	0.412444	-1.27773	0.00878019	Down	Hdlbp
NM_001107759.2	0.41249	-1.27757	0.00496539	Down	Disp2
NM_001079891.1	0.412645	-1.27703	0.00599067	Down	Magee1
NM_001109393.1	0.412842	-1.27634	0.00804216	Down	Timp4
XM_006256535.3	0.412922	-1.27606	0.0407912	Down	Mfsd4b
NM_001007727.1	0.412983	-1.27585	0.00953596	Down	Lypd1
XM_006235094.3	0.413065	-1.27556	0.0146715	Down	Plcb4
NM_001005886.1	0.413082	-1.2755	0.0175285	Down	Dagla
NM_021770.3	0.41317	-1.27519	0.00463941	Down	Olig1
NM_001107550.2	0.413257	-1.27489	0.00698692	Down	Sez6l2
XM_006243184.3	0.413309	-1.27471	0.0407498	Down	Stoml1
NM_001191666.1	0.413337	-1.27461	0.0357536	Down	Tchp
XM_006229330.3	0.413548	-1.27387	0.0379207	Down	Tjp1
NM_001102383.2	0.413769	-1.2731	0.00852824	Down	Pds5b
XM_345258.8	0.413874	-1.27274	0.0389362	Down	Ankrd35
XM_008764726.2	0.413907	-1.27262	0.00669995	Down	Pcnx4
NM_013002.4	0.413978	-1.27237	0.00684729	Down	Pcp4
XM_006254353.2	0.413993	-1.27232	0.0319499	Down	Abi1
XM_017589126.1	0.41408	-1.27202	0.024874	Down	Clip3
XM_017594616.1	0.414188	-1.27164	0.00429213	Down	Cntn1
NM_001106898.1	0.414244	-1.27145	0.010236	Down	Adgrb3
XM_008761234.2	0.414268	-1.27136	0.00786663	Down	Rusc1
NM_001271454.1	0.414339	-1.27112	0.0246557	Down	Igsf21
XM_017594060.1	0.414772	-1.26961	0.0135221	Down	Ptprn2
NM_001105748.1	0.415055	-1.26862	0.0372228	Down	Kcnd1
NM_001013060.1	0.415227	-1.26803	0.00652824	Down	Rit2
NM_001191822.1	0.415409	-1.26739	0.0127628	Down	Rhbdl1
NM_001113754.1	0.415588	-1.26677	0.0131583	Down	Grhpr
XM_006249754.3	0.415613	-1.26669	0.0084911	Down	Pik3c2b
NM_001005898.3	0.415708	-1.26636	0.00594026	Down	Omg
XM_017592446.1	0.415747	-1.26622	0.0293513	Down	Akap9
XM_006249816.3	0.416321	-1.26423	0.0192342	Down	Plekha6
NM_031676.2	0.416854	-1.26239	0.00646565	Down	Tagln3
NM_001024789.1	0.416999	-1.26189	0.00637426	Down	Nap1l2
NM_031091.2	0.41726	-1.26098	0.0127818	Down	Rab3b
XM_017593413.1	0.41727	-1.26095	0.0175973	Down	Rap1gap
XM_238899.8	0.417325	-1.26076	0.0119756	Down	Usp35
XM_017590990.1	0.41763	-1.2597	0.0179774	Down	Tbl1xr1
NM_001191981.1	0.417689	-1.2595	0.0406688	Down	Sntg1
NM_017237.3	0.417696	-1.25947	0.00548944	Down	Uchl1
NM_001106607.1	0.417963	-1.25855	0.00676966	Down	Podxl2
XM_006252166.3	0.418003	-1.25841	0.0491764	Down	Amer2
NM_001126280.1	0.418067	-1.25819	0.00644082	Down	Tmem179
XM_006254716.3	0.418071	-1.25818	0.0124392	Down	Snx2
NM_144756.2	0.41823	-1.25763	0.00645803	Down	Faim2
NM_020088.1	0.418316	-1.25734	0.00941282	Down	Tenm2
XM_017596765.1	0.418385	-1.2571	0.021817	Down	Col19a1
XM_003748887.4	0.418388	-1.25709	0.0214682	Down	LOC100911225
NM_001107312.1	0.418394	-1.25707	0.0482424	Down	Mtmr7
NM_022217.1	0.418398	-1.25705	0.00683903	Down	Amph
XM_008768582.1	0.418726	-1.25592	0.0499457	Down	Ttc3
XM_017599992.1	0.418962	-1.25511	0.0179542	Down	Glud1
NM_001014137.2	0.419024	-1.25489	0.0127055	Down	LOC361016
NM_001106598.1	0.419127	-1.25454	0.00740366	Down	Ctnna2
XM_017601940.1	0.419174	-1.25438	0.00607631	Down	Pak3
NM_001144840.1	0.419328	-1.25385	0.0379238	Down	Camsap3
XM_006244582.3	0.419409	-1.25357	0.00848485	Down	Tmem63b
XM_008773532.2	0.419416	-1.25355	0.0109291	Down	Tenm1
XM_006246294.3	0.419613	-1.25287	0.0326496	Down	Tbc1d9b
NM_172009.1	0.419719	-1.25251	0.00630992	Down	Ache
NM_001108617.1	0.41981	-1.25219	0.0168029	Down	Cdk14
NM_001109018.1	0.419904	-1.25187	0.00782933	Down	Rab9b
NM_001109195.1	0.419915	-1.25183	0.0095641	Down	Rnf208
XM_017590277.1	0.420182	-1.25091	0.025291	Down	LOC108349682
NM_001107593.1	0.420188	-1.25089	0.0262443	Down	Cnnm1
NM_019128.5	0.420313	-1.25046	0.00711334	Down	Ina
NM_001134729.1	0.420569	-1.24959	0.0319811	Down	Lyrm7
XM_006235099.3	0.420667	-1.24925	0.00553047	Down	Btbd3
NM_001177368.1	0.420713	-1.24909	0.00977143	Down	Lrrn2
NM_001013936.2	0.42075	-1.24896	0.0228472	Down	Slc25a34
NM_001013906.1	0.420751	-1.24896	0.0271206	Down	Lhfpl5
XM_006247637.2	0.420793	-1.24882	0.0218141	Down	RGD1565033
NM_001109391.1	0.420995	-1.24812	0.0278318	Down	Mab21l2
NM_134363.1	0.421184	-1.24748	0.00614941	Down	Slc12a5
NM_001107277.1	0.421241	-1.24728	0.0059056	Down	Lgi3
XM_017596713.1	0.421354	-1.2469	0.00740545	Down	LOC685668
XM_008765430.2	0.421362	-1.24687	0.0137723	Down	Fam19a2
NM_001107524.1	0.421521	-1.24632	0.0135621	Down	Rgma
NM_001034010.1	0.421592	-1.24608	0.00459657	Down	Tril
XM_006231723.3	0.421609	-1.24602	0.0287808	Down	RGD1560883
XM_215083.8	0.421619	-1.24599	0.0207999	Down	Asphd1
NM_001170542.1	0.421662	-1.24584	0.00687133	Down	Csdc2
NM_019161.2	0.42167	-1.24581	0.0152213	Down	Cdh22
NM_012502.1	0.421923	-1.24495	0.0283161	Down	Ar
XM_006257298.3	0.421927	-1.24493	0.00662191	Down	Zcchc18
XM_001074923.6	0.422764	-1.24208	0.0190108	Down	Mxra7
NM_053726.2	0.422822	-1.24188	0.00890205	Down	Slc7a10
XM_006239203.3	0.423131	-1.24082	0.00409107	Down	Ubr4
XM_002728176.5	0.423194	-1.24061	0.0436413	Down	Lrrc3b
NM_053865.1	0.423263	-1.24037	0.00659847	Down	Rtn1
NM_198773.1	0.423414	-1.23986	0.00868022	Down	Ppm1e
NM_053703.3	0.423459	-1.23971	0.0285121	Down	Map2k6
XM_008766359.2	0.423552	-1.23939	0.00709581	Down	Dmxl2
XM_017595135.1	0.423758	-1.23869	0.0215027	Down	Cacng2
XM_017591357.1	0.423869	-1.23831	0.00879778	Down	LOC108350133
XM_006229850.3	0.423904	-1.23819	0.0257808	Down	Stard10
XM_573950.7	0.423908	-1.23818	0.00909107	Down	Fam155a
XM_006241519.3	0.424149	-1.23736	0.00909343	Down	Tspyl5
XM_006230491.3	0.424169	-1.23729	0.0302792	Down	Mapk1ip1
XM_017599056.1	0.424202	-1.23718	0.040082	Down	Gabra4
NM_001191749.1	0.424295	-1.23686	0.0272052	Down	Dfna5
XM_017599546.1	0.4243	-1.23684	0.0146409	Down	Cc2d2a
NM_001025762.1	0.424464	-1.23629	0.0227669	Down	Smyd3
XM_017600772.1	0.424486	-1.23621	0.00930552	Down	LOC100910792
XM_006229692.3	0.424543	-1.23602	0.00729736	Down	Rab30
NM_001108105.1	0.424586	-1.23587	0.0317438	Down	Mlc1
XM_006254351.3	0.424658	-1.23563	0.0362779	Down	Acbd5
XM_017590812.1	0.424686	-1.23553	0.0472456	Down	Syde2
XM_008772735.2	0.424727	-1.23539	0.0119932	Down	Atp6v1g2
XM_017590429.1	0.424927	-1.23471	0.0239687	Down	LOC108349745
XM_017598663.1	0.424935	-1.23468	0.00958039	Down	Dnm3
XM_006229936.3	0.425049	-1.2343	0.0146639	Down	Apbb1
NM_001017457.2	0.425103	-1.23412	0.0408848	Down	Degs2
XM_006234826.3	0.42517	-1.23389	0.00629188	Down	Map1a
XM_017600506.1	0.425202	-1.23378	0.0361106	Down	Celf2
XM_017593927.1	0.425587	-1.23247	0.0149464	Down	Maneal
XM_006246125.3	0.425593	-1.23245	0.00816424	Down	Gabrg2
NM_017109.1	0.425644	-1.23228	0.0376128	Down	Syn3
NM_078620.2	0.425744	-1.23194	0.0099517	Down	Slc8a3
XM_006232512.3	0.42584	-1.23162	0.0138373	Down	Rapgef2
NM_139112.2	0.425843	-1.23161	0.0317722	Down	Lmo1
XM_006247427.3	0.426057	-1.23088	0.0383159	Down	Tubg2
XM_235565.9	0.426137	-1.23061	0.00734272	Down	Mapk8ip2
XM_006257054.3	0.426331	-1.22995	0.0119338	Down	Nlgn3
XM_006239535.3	0.426607	-1.22902	0.0372286	Down	Prkcz
NM_139337.1	0.426799	-1.22837	0.0260652	Down	Macrod1
NM_001108244.1	0.426801	-1.22836	0.0408581	Down	Klhl4
XM_008760719.2	0.426949	-1.22786	0.0129454	Down	Rab3c
XM_008766293.2	0.427005	-1.22768	0.011265	Down	Elovl4
XM_008759222.2	0.427079	-1.22742	0.0411569	Down	LOC103689986
NM_080689.4	0.427231	-1.22691	0.00703766	Down	Dnm1
XM_006242726.3	0.427257	-1.22683	0.0257754	Down	Eepd1
XM_017602201.1	0.427485	-1.22605	0.0140121	Down	Frmpd3
XM_342788.7	0.42773	-1.22523	0.00737792	Down	Tmtc1
NM_001271228.1	0.428028	-1.22422	0.020364	Down	Pcdh11x
XM_006235314.2	0.428031	-1.22421	0.0212614	Down	Ergic3
XM_017590471.1	0.428084	-1.22403	0.0067752	Down	Kndc1
XM_017595845.1	0.428207	-1.22362	0.0187752	Down	LOC501038
XM_008772820.2	0.428394	-1.22299	0.0459501	Down	Zfp523
NM_001195277.1	0.42848	-1.2227	0.00808476	Down	Tmem178b
XM_006238625.3	0.428633	-1.22218	0.0203067	Down	Slc6a9
NM_001134643.2	0.428754	-1.22178	0.0281489	Down	Kcnq5
XM_006237305.1	0.42881	-1.22159	0.0465513	Down	Necap1
NM_001107833.1	0.428904	-1.22127	0.0103812	Down	Lrsam1
XM_008766330.2	0.429085	-1.22066	0.0076189	Down	Nptn
XM_017590639.1	0.429199	-1.22028	0.0116583	Down	Olfm3
NM_012877.1	0.429268	-1.22005	0.0178931	Down	Scn2b
XM_006251609.3	0.429302	-1.21993	0.00741335	Down	Rtn4
NM_021678.1	0.429518	-1.21921	0.0128333	Down	Camk2n2
NM_001107121.1	0.429556	-1.21908	0.0214222	Down	Zfp316
XM_017595489.1	0.429926	-1.21784	0.00805576	Down	Tmprss5
XM_017593566.1	0.429971	-1.21769	0.0170414	Down	RGD1564053
NM_001270582.1	0.429989	-1.21763	0.0370996	Down	Adcyap1r1
XM_017595383.1	0.430087	-1.2173	0.0340284	Down	LOC108351600
NM_001017500.1	0.430271	-1.21668	0.0366492	Down	LOC498368
XM_017601838.1	0.430311	-1.21655	0.0248977	Down	LOC108353239
XM_006250015.3	0.43045	-1.21608	0.0399941	Down	Rgs8
XM_006242663.3	0.430597	-1.21559	0.00944792	Down	S1pr5
XM_017591838.1	0.430704	-1.21523	0.011494	Down	Zer1
XM_006250931.3	0.430779	-1.21498	0.00976907	Down	Gabra2
XM_006244757.3	0.431101	-1.2139	0.0195969	Down	Cnnm3
NM_001107834.1	0.431233	-1.21346	0.0254123	Down	Pbx3
XM_017599187.1	0.431488	-1.21261	0.0101224	Down	Limch1
XM_006238866.3	0.431533	-1.21246	0.00254266	Down	Thrap3
NM_001011942.1	0.431548	-1.21241	0.0166514	Down	Cnnm2
XM_006242041.3	0.431548	-1.21241	0.0095194	Down	Elfn2
NM_001191836.2	0.431664	-1.21202	0.0110262	Down	Gnal
XM_006240873.3	0.431779	-1.21163	0.0125032	Down	Abca7
XM_006240069.3	0.432302	-1.20989	0.0150055	Down	Nova1
NM_019253.3	0.432459	-1.20936	0.025455	Down	Ptpn5
XM_006256420.3	0.432645	-1.20874	0.0200993	Down	Micu1
NM_024128.3	0.432759	-1.20836	0.00869075	Down	Nsg1
NM_001105919.1	0.432923	-1.20782	0.0367169	Down	Fis1
XM_017594702.1	0.432946	-1.20774	0.0133525	Down	Erbb3
XM_017602275.1	0.433018	-1.2075	0.00883	Down	LOC108348096
XM_008764730.1	0.43318	-1.20696	0.0468723	Down	Syt16
XM_017602159.1	0.433275	-1.20665	0.0159374	Down	2018-09-06
XM_001079243.6	0.433293	-1.20659	0.0257365	Down	Tmem121
XM_017599320.1	0.433306	-1.20654	0.0477303	Down	Tmem17
NM_022238.1	0.433571	-1.20566	0.0120489	Down	Abcb9
NM_001008770.3	0.433752	-1.20506	0.0225525	Down	Cmbl
NM_182672.2	0.434101	-1.2039	0.0470676	Down	Cbr4
XM_006230573.3	0.434117	-1.20384	0.0299757	Down	Sprn
NM_001170398.1	0.434194	-1.20359	0.00733852	Down	Fry
XM_006245049.3	0.434247	-1.20341	0.0161498	Down	Idh1
NM_012719.2	0.4347	-1.20191	0.0262793	Down	Sstr1
XM_006242948.3	0.434709	-1.20188	0.0190098	Down	Cadm1
NM_001270796.1	0.434753	-1.20173	0.0229393	Down	Pla2g6
NM_024378.1	0.434794	-1.2016	0.0150421	Down	Grid1
NM_001001799.1	0.434932	-1.20114	0.0103917	Down	Tmem35
XM_006240802.3	0.43523	-1.20015	0.0415602	Down	Suox
XM_006238908.1	0.43583	-1.19816	0.00871283	Down	Ncdn
XM_006236037.3	0.435927	-1.19784	0.0198264	Down	Vps50
XM_006240636.3	0.436054	-1.19742	0.0342199	Down	Kif26a
NM_001048047.1	0.436138	-1.19714	0.0094043	Down	Reep2
NM_053996.2	0.436171	-1.19703	0.0365461	Down	Slc6a7
XM_008773635.2	0.436231	-1.19683	0.0104427	Down	L1cam
XM_017594571.1	0.436259	-1.19674	0.0395584	Down	Pou6f1
NM_001037355.1	0.436369	-1.19638	0.0257104	Down	Mettl7a
NM_012506.1	0.436609	-1.19559	0.00816797	Down	Atp1a3
XM_002730284.5	0.436613	-1.19557	0.0216756	Down	Zmat1
XM_017593691.1	0.436641	-1.19548	0.0322444	Down	RGD1559441
NM_134466.2	0.437086	-1.19401	0.00962887	Down	Stau2
NM_022666.1	0.437445	-1.19283	0.0174325	Down	Grm4
NM_001107671.1	0.437528	-1.19255	0.0200449	Down	Plcxd3
NM_001261389.1	0.437619	-1.19225	0.0486772	Down	Kcnip1
NM_134376.1	0.437669	-1.19209	0.00901918	Down	Clstn3
XM_006233875.3	0.437726	-1.1919	0.0162169	Down	Olfm1
XM_006249750.3	0.437972	-1.19109	0.0141424	Down	Cdk18
NM_001107432.1	0.438028	-1.19091	0.0141917	Down	Cntnap4
NM_001107519.1	0.438103	-1.19066	0.0192204	Down	Nipa1
XM_006250414.2	0.438381	-1.18974	0.0194182	Down	Cnst
NM_001108633.1	0.438457	-1.18949	0.00893062	Down	Reep1
XM_006250112.3	0.438623	-1.18895	0.0168885	Down	Klhl20
XM_017591383.1	0.438686	-1.18874	0.0116102	Down	Pcdh10
NM_001014114.1	0.438805	-1.18835	0.0115187	Down	RGD1305733
XM_006251888.2	0.438852	-1.1882	0.0221545	Down	Tmem55b
XM_008767525.2	0.438895	-1.18805	0.0252519	Down	Adcy9
NM_001100722.1	0.43891	-1.188	0.0473993	Down	Lingo1
NM_001107025.1	0.439045	-1.18756	0.0373341	Down	Abhd15
XM_017600238.1	0.439069	-1.18748	0.0120988	Down	Gas6
NM_001270544.1	0.439217	-1.187	0.0105683	Down	Mapk9
XM_017596831.1	0.439432	-1.18629	0.03516	Down	Dock10
XM_006251396.3	0.439631	-1.18564	0.0106536	Down	Fgfr3
XM_008759270.2	0.439964	-1.18454	0.0316022	Down	Zfp536
XM_008770690.2	0.440052	-1.18425	0.0140756	Down	Jph4
XM_017593168.1	0.440117	-1.18404	0.0297616	Down	Agrn
NM_019123.1	0.440245	-1.18362	0.0131847	Down	St6galnac3
NM_032084.1	0.440247	-1.18361	0.014737	Down	Chn2
XM_017594957.1	0.44027	-1.18354	0.0145411	Down	Mtss1
NM_001106857.1	0.440301	-1.18344	0.0202669	Down	Nckipsd
NM_001113422.1	0.440352	-1.18327	0.034274	Down	Nr1d1
NM_053440.2	0.440454	-1.18294	0.00958115	Down	Stmn2
XM_008768700.2	0.440593	-1.18248	0.0212736	Down	Golgb1
XM_008759472.2	0.440634	-1.18235	0.00903872	Down	Luzp2
NM_001190237.1	0.440719	-1.18207	0.0101796	Down	Psap
XM_006236522.3	0.440896	-1.18149	0.0251979	Down	LOC100912608
XM_008762950.2	0.440896	-1.18149	0.0251979	Down	Hoxa10
NM_001191707.1	0.44097	-1.18125	0.0412327	Down	Plch1
XM_006240284.3	0.441241	-1.18036	0.0414745	Down	Smoc1
XM_218634.8	0.441352	-1.18	0.0436703	Down	Iglon5
XM_008763992.2	0.441477	-1.17959	0.0184728	Down	Ipp
NM_181089.1	0.441479	-1.17958	0.0137161	Down	MAST1
NM_053779.1	0.441488	-1.17955	0.0112542	Down	Serpini1
NM_001017376.1	0.441802	-1.17853	0.0141509	Down	Phyhip
XM_017590475.1	0.441932	-1.1781	0.0137538	Down	Ifitm10
XM_017592339.1	0.441982	-1.17794	0.0268946	Down	Fmn1
XM_008769816.2	0.442137	-1.17743	0.0157771	Down	Mark1
NM_001044238.1	0.442153	-1.17738	0.0202517	Down	Gdpd1
XM_006247647.2	0.442154	-1.17738	0.0122448	Down	Tex2
NM_017203.1	0.442212	-1.17719	0.0107198	Down	Gdf11
NM_053566.1	0.44236	-1.17671	0.00822739	Down	Ptch1
NM_170718.1	0.442409	-1.17655	0.0113179	Down	Kcnj14
NM_172035.1	0.442489	-1.17629	0.029353	Down	Fzd2
NM_001106995.1	0.442709	-1.17557	0.0245424	Down	Nipal4
XM_006230464.3	0.442895	-1.17496	0.0284875	Down	Ebf3
XM_008768202.2	0.442945	-1.1748	0.0159307	Down	Rapgefl1
XM_008771644.2	0.443044	-1.17448	0.0188448	Down	Carmil1
NM_138544.1	0.443154	-1.17412	0.0103463	Down	Fat3
XM_342561.8	0.44348	-1.17306	0.0189884	Down	Vstm2l
NM_031630.2	0.443694	-1.17236	0.0250054	Down	Ddx25
XM_006233136.2	0.443813	-1.17198	0.0128053	Down	Sars
XM_017602122.1	0.443971	-1.17146	0.0380655	Down	Armcx2
XM_017593646.1	0.444366	-1.17018	0.047282	Down	Chd5
NM_199409.2	0.444375	-1.17015	0.0131718	Down	Panx2
NM_001107922.2	0.444468	-1.16985	0.0249828	Down	Pm20d2
XM_006241201.3	0.444499	-1.16975	0.030132	Down	Appl2
XM_008771689.2	0.444612	-1.16938	0.0221958	Down	Adarb2
NM_001024980.1	0.444651	-1.16926	0.0436787	Down	Ankrd34a
NM_001107144.1	0.444865	-1.16856	0.0132962	Down	Rnft2
NM_001014178.2	0.445005	-1.16811	0.0111608	Down	Fam69b
NM_001107301.1	0.445109	-1.16777	0.0112765	Down	Abhd8
XM_006256561.3	0.445208	-1.16745	0.0164749	Down	Sesn1
NM_001037769.2	0.445208	-1.16745	0.0443321	Down	Apopt1
XM_017597825.1	0.445247	-1.16732	0.0215433	Down	Rac3
XM_017597797.1	0.445421	-1.16676	0.0288526	Down	RGD1562276
NM_001195559.1	0.445589	-1.16622	0.0106632	Down	Camta1
NM_001134481.1	0.44561	-1.16615	0.0139298	Down	Plcxd2
XM_017593126.1	0.445629	-1.16608	0.0377188	Down	Lpar1
NM_001107941.1	0.445678	-1.16593	0.0184693	Down	Dcaf12
NM_001110797.1	0.445754	-1.16568	0.0179097	Down	Pclo
NM_031069.1	0.445779	-1.1656	0.0287636	Down	Nell1
XM_008770136.2	0.445911	-1.16517	0.0127064	Down	Gabrb1
NM_001170531.1	0.445939	-1.16508	0.0111175	Down	Rasgrf1
NM_001106527.2	0.445976	-1.16496	0.0266128	Down	Tspy26
NM_001108359.1	0.446079	-1.16463	0.0108452	Down	Dcun1d4
NM_001271250.1	0.446108	-1.16454	0.0147143	Down	Stxbp5l
XM_006233675.3	0.44612	-1.1645	0.0172998	Down	Camsap1
NM_012526.2	0.446385	-1.16364	0.0110679	Down	Chgb
XM_008758675.2	0.446388	-1.16363	0.0111789	Down	Ncoa7
NM_017294.1	0.446544	-1.16313	0.0132298	Down	Pacsin1
XM_006233939.3	0.446756	-1.16244	0.0105236	Down	Stxbp1
XM_006252097.3	0.446795	-1.16232	0.0131743	Down	Dpysl2
NM_001106619.1	0.446818	-1.16224	0.0100815	Down	Usp5
NM_019159.1	0.446834	-1.16219	0.0152976	Down	Syn2
XM_008765828.2	0.446841	-1.16217	0.0108805	Down	Kif21a
NM_001106387.1	0.447097	-1.16134	0.0217619	Down	Lrrtm3
NM_001134414.2	0.447126	-1.16125	0.0291533	Down	Tmtc4
NM_021748.1	0.447297	-1.1607	0.0105902	Down	Nsf
NM_001108478.1	0.447382	-1.16042	0.0323443	Down	Ttc9b
XM_006230649.3	0.447385	-1.16041	0.0128042	Down	Rtn3
NM_001107437.1	0.447582	-1.15978	0.011841	Down	Jph3
XM_006233157.3	0.447605	-1.1597	0.013062	Down	Wdr47
NM_001107890.1	0.447814	-1.15903	0.0225646	Down	Tspan9
XM_017602256.1	0.447904	-1.15874	0.01578	Down	LOC108348172
XM_017589086.1	0.448112	-1.15807	0.0436313	Down	Fam45a
NM_133296.1	0.448241	-1.15765	0.0172926	Down	Slc6a20
XM_008772295.2	0.448245	-1.15764	0.0307419	Down	Kifc3
NM_001007672.1	0.44828	-1.15753	0.0223194	Down	Tmem98
NM_012660.2	0.448308	-1.15744	0.0109118	Down	Eef1a2
XM_006246508.3	0.448457	-1.15696	0.0133726	Down	Tom1l2
NM_001107871.1	0.448814	-1.15581	0.0241799	Down	Fbxo41
NM_012746.1	0.448958	-1.15535	0.0163436	Down	Pcsk2
XM_006228579.3	0.449102	-1.15488	0.0149947	Down	Pld3
XM_002727761.5	0.449358	-1.15406	0.0222147	Down	Wwc1
XM_006242013.3	0.449458	-1.15374	0.0320854	Down	Tmem184b
NM_001270981.1	0.449701	-1.15296	0.013893	Down	Fndc5
XM_008758919.1	0.449771	-1.15274	0.0134037	Down	Arhgap35
XM_017600009.1	0.449894	-1.15234	0.039631	Down	Lzts1
XM_017598068.1	0.44996	-1.15213	0.0158131	Down	Adcy5
NM_001126093.2	0.450582	-1.15014	0.0178698	Down	Pcp4l1
NM_133422.1	0.450616	-1.15003	0.0185464	Down	Zfp483
XM_006231748.3	0.450666	-1.14987	0.00796432	Down	Hapln1
XM_017590473.1	0.450734	-1.14965	0.0127746	Down	LOC103691267
XM_008766400.2	0.450757	-1.14958	0.00814057	Down	Herc1
NM_053498.1	0.450762	-1.14956	0.0182434	Down	Entpd6
NM_001277394.1	0.451317	-1.14779	0.027508	Down	Srrm3
NM_019211.2	0.451436	-1.14741	0.0344006	Down	Rasgrp1
NM_053684.1	0.451647	-1.14673	0.0121131	Down	Hcn2
NM_001127607.1	0.451837	-1.14613	0.0197774	Down	Ttc30b
XM_006235741.2	0.451841	-1.14611	0.0163689	Down	Tcea2
NM_023954.1	0.451908	-1.1459	0.0130887	Down	Kcna6
NM_214457.2	0.451935	-1.14581	0.0234803	Down	Phactr1
XM_008769982.2	0.451955	-1.14575	0.0359577	Down	Adgrl3
XM_006245522.3	0.45206	-1.14541	0.0437412	Down	D2hgdh
NM_001100533.1	0.452066	-1.1454	0.0247998	Down	Nacc2
NM_170668.1	0.452101	-1.14528	0.0470392	Down	Slc13a5
NM_021682.1	0.452315	-1.1446	0.0152287	Down	Negr1
XM_017601658.1	0.452474	-1.14409	0.0465078	Down	Fig4
NM_001008558.1	0.452477	-1.14408	0.012498	Down	Ndn
XM_006248339.3	0.452499	-1.14401	0.0123091	Down	Lsamp
NM_001106722.1	0.453194	-1.1418	0.0200859	Down	Gpr22
XM_006257592.1	0.453204	-1.14177	0.023257	Down	Fgf13
XM_017601166.1	0.453261	-1.14159	0.0263371	Down	Necab2
XM_006250123.3	0.453331	-1.14136	0.0431228	Down	Ankrd45
XM_017601078.1	0.453452	-1.14098	0.0130779	Down	Dtna
XM_008763724.2	0.453911	-1.13952	0.019131	Down	Fsd1l
XM_008767349.2	0.454046	-1.13909	0.0127218	Down	Unc80
XM_017599212.1	0.454046	-1.13909	0.0391584	Down	Depdc5
NM_012643.2	0.454106	-1.1389	0.0186276	Down	Ret
XM_017598910.1	0.454223	-1.13853	0.0173532	Down	Cacna1e
NM_031778.2	0.454296	-1.13829	0.0221207	Down	Kcns3
NM_001083898.1	0.45449	-1.13768	0.018386	Down	Ccdc92
NM_023956.1	0.454703	-1.137	0.0195009	Down	Gucy1a2
XM_345535.8	0.454992	-1.13609	0.0177776	Down	Frrs1l
NM_053583.2	0.455092	-1.13577	0.0170893	Down	Zfp423
NM_031597.4	0.455132	-1.13564	0.0206142	Down	Kcnq3
NM_138515.2	0.455225	-1.13535	0.0203141	Down	Cyp2d4
XM_001073964.4	0.455233	-1.13532	0.024306	Down	Hlf
NM_133402.2	0.455241	-1.1353	0.0159531	Down	Nap1l3
XM_006232390.3	0.45532	-1.13505	0.0110016	Down	Pfn2
XM_006234701.3	0.455343	-1.13497	0.0230423	Down	Scg5
XM_006244349.3	0.455457	-1.13461	0.0173135	Down	Sema6b
XM_006234710.3	0.455461	-1.1346	0.0118289	Down	Slc12a6
XM_008761250.2	0.455479	-1.13454	0.024674	Down	Dennd4b
NM_012664.3	0.45554	-1.13435	0.0134511	Down	Syp
XM_017597976.1	0.45555	-1.13432	0.0438754	Down	Map3k13
XM_003750501.4	0.455597	-1.13417	0.0251194	Down	Rnf214
NM_078619.1	0.456027	-1.13281	0.0426254	Down	Slc8a2
XM_008766222.2	0.456046	-1.13275	0.013971	Down	Atm
NM_001109320.1	0.456063	-1.1327	0.0393005	Down	Amer1
NM_001104528.1	0.456209	-1.13223	0.0233018	Down	Ephb1
NM_001108844.1	0.456337	-1.13183	0.0462286	Down	Map6d1
NM_001127538.1	0.45645	-1.13147	0.0223926	Down	Spire2
XM_017596848.1	0.456575	-1.13108	0.0148217	Down	Dner
NM_001109150.2	0.456654	-1.13083	0.0260932	Down	Fam181b
XM_006232952.3	0.456828	-1.13028	0.0134486	Down	Sv2a
XM_017600398.1	0.456992	-1.12976	0.0342987	Down	Nrg3
NM_001271332.2	0.457169	-1.1292	0.0195645	Down	Fhod3
XM_017590242.1	0.457225	-1.12903	0.0240072	Down	Adgra1
NM_019166.2	0.457276	-1.12886	0.0173682	Down	Syngr1
NM_183326.2	0.457305	-1.12877	0.0233512	Down	Gabra1
XM_006229064.3	0.457312	-1.12875	0.0151114	Down	Ap2a1
XM_006247799.3	0.457375	-1.12855	0.0386945	Down	Mgat5b
XM_003749275.3	0.45759	-1.12787	0.0313947	Down	Ndufc1
XM_017596266.1	0.457637	-1.12772	0.0186162	Down	Pja2
XM_008770348.2	0.458086	-1.12631	0.0498136	Down	Grb10
XM_579793.6	0.458105	-1.12625	0.0158397	Down	RGD1560398
XM_008771505.1	0.45847	-1.1251	0.0455797	Down	Unc5a
XM_003748891.3	0.458476	-1.12508	0.0154907	Down	Ap3b2
NM_001289778.1	0.458495	-1.12502	0.0147288	Down	Map7d2
NM_001106100.1	0.458657	-1.12451	0.0114341	Down	Agtpbp1
NM_001270863.1	0.458706	-1.12436	0.0150522	Down	Ndrg2
XM_006235833.3	0.459027	-1.12335	0.0483176	Down	Fam217b
NM_001024883.1	0.459335	-1.12238	0.0152938	Down	Pomk
NM_001100863.1	0.459511	-1.12183	0.0176451	Down	Galnt16
NM_024483.1	0.459554	-1.12169	0.0445484	Down	Adra1d
NM_017092.1	0.459737	-1.12112	0.0142031	Down	Tyro3
XM_008761559.2	0.459834	-1.12081	0.0163177	Down	Miga1
XM_006239632.3	0.459925	-1.12053	0.0493211	Down	Qpct
NM_001105953.2	0.460009	-1.12027	0.0183007	Down	Tmem9
XM_221188.9	0.460067	-1.12008	0.0386664	Down	Tbc1d16
NM_001142366.2	0.460337	-1.11924	0.0121344	Down	Aqp4
XM_006253200.3	0.460659	-1.11823	0.0187092	Down	Micu3
NM_001304816.1	0.460864	-1.11759	0.013568	Down	Peg3
XM_006232652.3	0.460871	-1.11756	0.0434816	Down	Arhgef2
XM_017601916.1	0.460873	-1.11756	0.0231466	Down	Gabra3
XM_006239937.3	0.461051	-1.117	0.0166585	Down	Kidins220
XM_017597866.1	0.461076	-1.11692	0.0496035	Down	Opa1
NM_019133.2	0.461212	-1.1165	0.0301666	Down	Syn1
XM_008770884.2	0.461645	-1.11514	0.0419233	Down	Serp2
XM_213790.10	0.461678	-1.11504	0.0302873	Down	Tesc
XM_006248349.3	0.461703	-1.11496	0.0219179	Down	Atp6v1a
XM_008759566.2	0.461739	-1.11485	0.0329436	Down	Otud7a
NM_001109118.1	0.461819	-1.1146	0.0205975	Down	Elovl2
NM_001109912.1	0.462002	-1.11403	0.0150334	Down	Tsc22d1
XM_017592970.1	0.46219	-1.11344	0.0170954	Down	Plxna4
XM_017592952.1	0.462363	-1.1129	0.0436484	Down	LOC108350662
XM_006255218.3	0.46246	-1.1126	0.0132388	Down	Tecr
XM_006251193.3	0.462563	-1.11228	0.0400992	Down	RGD1560394
NM_053342.3	0.462837	-1.11142	0.0293674	Down	Cxxc4
NM_001134862.1	0.462851	-1.11138	0.0302602	Down	Pbx1
XM_006244898.3	0.463005	-1.1109	0.0290941	Down	Mfsd6
XM_008764390.2	0.463192	-1.11032	0.0265739	Down	Dvl1
NM_001107280.1	0.46332	-1.10992	0.0433614	Down	Pcdh20
NM_080885.1	0.463591	-1.10908	0.0192938	Down	Cdk5
XM_008762930.2	0.463662	-1.10885	0.0160654	Down	Cntnap2
XM_017598044.1	0.463813	-1.10839	0.0386932	Down	Slc35a5
NM_001105732.2	0.464192	-1.10721	0.0240927	Down	Sec23a
XM_001056014.6	0.464398	-1.10657	0.0156712	Down	Chic1
NM_001037217.1	0.464469	-1.10635	0.0148482	Down	Mmd2
NM_001100730.1	0.464588	-1.10598	0.0201489	Down	Nipsnap1
NM_031727.2	0.464697	-1.10564	0.0128823	Down	Limk1
NM_138837.1	0.464824	-1.10524	0.0287607	Down	Pou3f3
NM_057201.1	0.464835	-1.10521	0.0174977	Down	Gpr37
XM_017595362.1	0.464946	-1.10486	0.0217512	Down	Csmd3
NM_017041.1	0.465027	-1.10461	0.0169246	Down	Ppp3ca
XM_008772512.2	0.465113	-1.10435	0.0169022	Down	Mtss1l
NM_199407.1	0.465191	-1.10411	0.0211332	Down	Unc5c
NM_130738.2	0.465228	-1.10399	0.0157236	Down	Snurf
XM_006253671.3	0.465322	-1.1037	0.0233257	Down	Diras2
XM_008764971.2	0.465414	-1.10341	0.0395693	Down	Tecpr2
XM_017597091.1	0.46544	-1.10333	0.0127928	Down	Zbtb4
XM_006254965.3	0.465836	-1.1021	0.0217796	Down	Hdhd2
XM_003749739.4	0.466285	-1.10072	0.0259213	Down	Tcaf1
XM_006241994.3	0.466296	-1.10068	0.0139909	Down	Cbx6
XM_006244607.3	0.466328	-1.10058	0.0177513	Down	Enpp5
XM_017589248.1	0.466366	-1.10046	0.0255806	Down	Peli3
XM_006237804.2	0.466847	-1.09898	0.0181718	Down	Atp6v1h
NM_001107959.1	0.466907	-1.09879	0.0220762	Down	Atpaf1
XM_006231307.2	0.467231	-1.09779	0.0398341	Down	Htr7
XM_006257447.3	0.467437	-1.09716	0.0357413	Down	Lonrf3
NM_001135799.1	0.467715	-1.0963	0.0440332	Down	Bmper
NM_012800.1	0.467823	-1.09596	0.028192	Down	P2ry1
XM_006254523.3	0.467857	-1.09586	0.0380024	Down	Camk4
NM_001079889.2	0.467871	-1.09582	0.0123007	Down	Sephs2
XM_006239294.3	0.467963	-1.09553	0.0321133	Down	Fam43b
NM_001025145.1	0.468074	-1.09519	0.0242078	Down	Zfp365
NM_001107981.1	0.468254	-1.09464	0.0337333	Down	RGD1563072
NM_001034152.1	0.468262	-1.09461	0.0174458	Down	Nsg2
NM_173337.1	0.468291	-1.09452	0.0193271	Down	Camk2n1
XM_006245947.3	0.468379	-1.09425	0.020069	Down	Syngr3
NM_001271502.1	0.468701	-1.09326	0.0260593	Down	Ctnnd2
NM_001105801.2	0.469073	-1.09212	0.0212979	Down	Camta2
NM_001106367.3	0.469163	-1.09184	0.0301747	Down	Sorcs3
NM_001107863.1	0.469175	-1.0918	0.0305297	Down	Ppm1k
NM_133610.2	0.469191	-1.09175	0.0344965	Down	Kcnh5
XM_017590730.1	0.469691	-1.09022	0.0316288	Down	Tnik
NM_001106582.1	0.469841	-1.08976	0.0389489	Down	Gpr165
XM_003749245.4	0.470082	-1.08901	0.0283709	Down	Tceal6
XM_006238139.3	0.470357	-1.08817	0.0285434	Down	Tmem8b
XM_006231421.2	0.470397	-1.08805	0.0342577	Down	Golga7b
XM_008764009.1	0.470449	-1.08789	0.0247457	Down	Zswim5
XM_008768942.2	0.470601	-1.08742	0.0342255	Down	Prkar1b
XM_002728703.4	0.470892	-1.08653	0.0411816	Down	Tmem145
NM_001106214.1	0.471037	-1.08609	0.0344265	Down	Lix1
XM_008768129.2	0.471071	-1.08598	0.0263581	Down	Mpp2
NM_030839.3	0.471312	-1.08524	0.0407118	Down	Syt13
XM_006253423.3	0.471462	-1.08479	0.0434254	Down	Mcf2l
NM_001012349.2	0.471593	-1.08439	0.0344848	Down	Plpp7
NM_001108790.1	0.471642	-1.08424	0.0316376	Down	Tmem14a
XM_008762983.2	0.471648	-1.08422	0.0172123	Down	Immt
NM_133587.1	0.471953	-1.08328	0.0265171	Down	Dscam
XM_017591417.1	0.472039	-1.08302	0.0146776	Down	Ank2
NM_001013101.1	0.472046	-1.083	0.0217787	Down	Moap1
NM_001008369.1	0.472077	-1.08291	0.0173703	Down	Pitpnm1
NM_001316877.1	0.472152	-1.08268	0.0153873	Down	Mdh1
XM_006249854.3	0.472189	-1.08256	0.0468169	Down	Kif21b
NM_019278.1	0.472258	-1.08235	0.0229464	Down	Resp18
XM_017595933.1	0.47243	-1.08183	0.0236098	Down	Gnb5
NM_001126374.1	0.472707	-1.08098	0.0342884	Down	Zc4h2
NM_001034014.1	0.473055	-1.07992	0.0477385	Down	Asic2
NM_001110763.2	0.473248	-1.07933	0.0308166	Down	Tmem163
NM_001271192.1	0.473372	-1.07895	0.0242726	Down	Fzd10
XM_003749282.3	0.473826	-1.07757	0.0239616	Down	LOC100909840
NM_001105974.1	0.473902	-1.07734	0.0342783	Down	Grem2
NM_001108824.1	0.474055	-1.07687	0.043082	Down	Fbll1
XM_008761972.2	0.474134	-1.07663	0.0179055	Down	Slc25a12
NM_001044293.1	0.474157	-1.07656	0.019982	Down	Nap1l5
NM_001108951.1	0.474322	-1.07606	0.0347656	Down	LOC365985
XM_577026.7	0.474641	-1.07509	0.0282631	Down	Tceal3
NM_001191800.1	0.474831	-1.07451	0.0385941	Down	Dclk3
XM_008769391.1	0.475024	-1.07393	0.0351788	Down	LOC100909512
NM_012721.2	0.475238	-1.07328	0.0252362	Down	P2rx6
NM_001191947.1	0.475421	-1.07272	0.0226758	Down	Dact3
NM_031802.1	0.475546	-1.07234	0.024184	Down	Gabbr2
NM_001276470.1	0.475639	-1.07206	0.0271549	Down	Prrt2
NM_001039008.1	0.475818	-1.07152	0.0347131	Down	Tmem176a
NM_001108749.1	0.476166	-1.07046	0.0433359	Down	Dennd6b
XM_017599711.1	0.476285	-1.0701	0.021555	Down	Pcdh9
NM_031780.1	0.476349	-1.06991	0.0222	Down	Apba2
XM_017593069.1	0.476471	-1.06954	0.030449	Down	Caprin2
XM_017590738.1	0.476476	-1.06953	0.0461857	Down	Mccc1
XM_017592778.1	0.476535	-1.06935	0.018389	Down	Thsd7a
XM_017594532.1	0.476599	-1.06915	0.0229281	Down	Mta3
NM_001106109.2	0.476652	-1.06899	0.0328421	Down	Nrsn1
XM_017596073.1	0.476906	-1.06822	0.0340848	Down	Igdcc4
XM_006256588.3	0.476943	-1.06811	0.04711	Down	Qrsl1
NM_053502.1	0.47708	-1.0677	0.0223766	Down	Abcg1
XM_006251656.3	0.477208	-1.06731	0.0400305	Down	Sec24c
NM_024000.1	0.477313	-1.06699	0.0247956	Down	Camkv
XM_006241302.3	0.477378	-1.0668	0.0481438	Down	Acss3
NM_001134561.3	0.477433	-1.06663	0.0432662	Down	Zfp563
NM_001013923.1	0.477817	-1.06547	0.0191183	Down	Ndrg3
XM_006246341.3	0.477961	-1.06503	0.0317362	Down	Anxa6
NM_031701.2	0.478005	-1.0649	0.0142957	Down	Cldn5
NM_147138.2	0.478408	-1.06369	0.0188267	Down	Zwint
XM_006228013.3	0.478458	-1.06354	0.0360734	Down	Cacng7
[truncated: 180 more rows]
